# Supplementary material for: Socioeconomic patterning of excess alcohol consumption and binge drinking: a cross-sectional study of multilevel associations with neighbourhood deprivation
Source: PubMed Central journal article supplement — BMJ Open. 2013 Apr 15;3(4):e002337. doi: 10.1136/bmjopen-2012-002337 (PMC3641461; doi:10.1136/bmjopen-2012-002337), 2013-04-15
Supplement: bmjopen-2012-002337.draft_revisions.pdf [file bmjopen-2012-002337.draft_revisions.pdf]

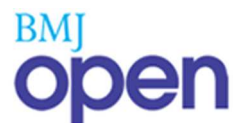

**Socioeconomic patterning of excess alcohol consumption and binge drinking: a cross-sectional study of multilevel associations with neighbourhood deprivation**

|                                 |                                                                                                                                                                                                                                                                                                                                                                                                                                               |
|---------------------------------|-----------------------------------------------------------------------------------------------------------------------------------------------------------------------------------------------------------------------------------------------------------------------------------------------------------------------------------------------------------------------------------------------------------------------------------------------|
| Journal:                        | <i>BMJ Open</i>                                                                                                                                                                                                                                                                                                                                                                                                                               |
| Manuscript ID:                  | bmjopen-2012-002337                                                                                                                                                                                                                                                                                                                                                                                                                           |
| Article Type:                   | Research                                                                                                                                                                                                                                                                                                                                                                                                                                      |
| Date Submitted by the Author:   | 12-Nov-2012                                                                                                                                                                                                                                                                                                                                                                                                                                   |
| Complete List of Authors:       | Fone, David; Cardiff University, Institute of Primary Care & Public Health<br>Farewell, Daniel; Cardiff University, Institute of Primary Care & Public Health<br>White, James; Cardiff University, Centre for the Development and Evaluation of Complex Interventions for Public Health Improvement<br>Lyons, Ronan; Swansea University, College of Medicine<br>Dunstan, Frank; Cardiff University, Institute of Primary Care & Public Health |
| <b>Primary Subject Heading</b>: | Epidemiology                                                                                                                                                                                                                                                                                                                                                                                                                                  |
| Secondary Subject Heading:      | Public health                                                                                                                                                                                                                                                                                                                                                                                                                                 |
| Keywords:                       | EPIDEMIOLOGY, PUBLIC HEALTH, PREVENTIVE MEDICINE                                                                                                                                                                                                                                                                                                                                                                                              |
|                                 |                                                                                                                                                                                                                                                                                                                                                                                                                                               |

SCHOLARONE™  
Manuscripts

only

1  
2  
3 **Socioeconomic patterning of excess alcohol consumption and**  
4  
5  
6 **binge drinking: a cross-sectional study of multilevel associations**  
7  
8  
9 **with neighbourhood deprivation**  
10

11  
12  
13  
14 David L Fone<sup>1</sup> MD

15  
16 Daniel M Farewell<sup>1</sup> PhD

17  
18 James White<sup>2</sup> PhD

19  
20 Ronan A Lyons<sup>3</sup> MD

21  
22 Frank D Dunstan<sup>1</sup> DPhil  
23  
24  
25

26  
27 1. Institute of Primary Care & Public Health, School of Medicine, Heath Park, Cardiff  
28  
29 University, Cardiff, CF14 4YS, UK

30  
31 2. Centre for the Development and Evaluation of Complex Public Health Interventions,  
32  
33 School of Medicine, Cardiff University, Heath Park, Cardiff, CF14 4YS, UK

34  
35 3. College of Medicine, Swansea University, Swansea SA2 8PP, UK  
36  
37  
38

39  
40 Corresponding author:

41  
42 Professor David L Fone

43  
44 Institute of Primary Care & Public Health, School of Medicine, 4th Floor Neuadd

45  
46 Merionnydd, Heath Park, Cardiff University, Cardiff, CF14 4YS, UK

47  
48 Telephone 02920 687241, Fax 02920 687236, e-mail foned@cf.ac.uk  
49  
50  
51

52 **Keywords**

53  
54 Alcohol, Social epidemiology, multilevel modelling, Public Health  
55  
56  
57  
58  
59  
60

## ABSTRACT

### Objectives

The influence of neighbourhood deprivation on the risk of harmful alcohol consumption, measured by the separate categories of excess consumption and binge drinking, has not been studied. The objectives of the study was to investigate the joint effects of neighbourhood deprivation with age, gender and socio-economic status (SES) on (1) excess alcohol consumption above guideline limits, and (2) binge drinking, in a representative sample of the adult population of Wales, UK.

### Design

Cross-sectional study: a multi-level analysis of a population-based dataset.

### Setting

Wales, UK, adult population ~ 2.4 million.

### Participants

58 282 respondents aged 18 years and over to four successive annual Welsh Health Surveys (2003/04-2007), nested within 32 692 households, 1839 census lower super output areas and the 22 unitary authority areas in Wales.

### Primary outcome measure

Maximal daily alcohol consumption during the past week was categorised using the UK Department of Health definition of 'none/never drinks', 'within guidelines', 'excess

1  
2  
3 consumption but less than binge' and 'binge'. The data were analysed using continuation ratio  
4  
5 ordinal multilevel models with multiple imputation for missing covariates.  
6  
7

## 8 9 **Results**

10 Respondents in the most deprived neighbourhoods were more likely to binge drink than in the  
11  
12 least deprived (adjusted estimates: 17.5% vs. 10.6%; difference = 6.9%, 95% CI: 6.0 to 7.8),  
13  
14 but were less likely to report excess consumption (17.6% vs. 21.3%; difference = 3.7%, 95%  
15  
16 CI: 2.6 to 4.8). The effect of deprivation varied significantly with age and gender, but not with  
17  
18 SES. Younger males in deprived neighbourhoods were most likely to binge drink but the  
19  
20 largest interaction effect of deprivation on binge drinking was found for middle-aged males  
21  
22 living in the most deprived areas.  
23  
24  
25  
26  
27

## 28 29 **Conclusion**

30 Neighbourhood deprivation is an important factor in the understanding of socio-economic  
31  
32 patterns of categories of harmful alcohol consumption and for public health policy  
33  
34 development.  
35  
36  
37  
38  
39  
40  
41  
42  
43  
44  
45  
46  
47  
48  
49  
50  
51  
52  
53  
54  
55  
56  
57  
58  
59  
60

## ARTICLE SUMMARY

### Article Focus

- A recent systematic review found little evidence that living in neighbourhoods of high socio-economic deprivation is associated with a higher risk of harmful alcohol consumption
- The important distinction between excess alcohol consumption and binge drinking has not previously been investigated

### Key Messages

- A higher risk of binge drinking was found in residents living in deprived neighbourhoods, particularly in young and middle-aged men
- A higher risk of excess consumption, but less than binge, was found in residents of less deprived neighbourhoods
- Neighbourhood socio-economic deprivation is an important factor to consider in public health alcohol policy development

### Strengths and Limitations

- The main strength is the large representative dataset of over 58 000 respondents, or around one in fifty of the socially diverse Welsh adult population. The ordinal alcohol consumption outcome measure was based on a widely used definition published by the UK Department of Health

1  
2  
3  
4  
5  
6  
7  
8  
9  
10  
11  
12  
13  
14  
15  
16  
17  
18  
19  
20  
21  
22  
23  
24  
25  
26  
27  
28  
29  
30  
31  
32  
33  
34  
35  
36  
37  
38  
39  
40  
41  
42  
43  
44  
45  
46  
47  
48  
49  
50  
51  
52  
53  
54  
55  
56  
57  
58  
59  
60

- The cross-sectional analysis used the administratively defined census LSOA as a proxy for ‘neighbourhood’ and cannot investigate the possibility of causal relationships. Social desirability bias may result in under-reported alcohol consumption, although it is not known whether this varies between neighbourhoods.

For peer review only

## INTRODUCTION

Excess alcohol consumption causes a major global burden of disease, injury and social and economic cost.[1] Binge drinking, typically defined as consuming at least double the guideline limits in a single day during the previous week,[2] is an increasing problem which is rising particularly in young women.[3] It is associated with anti-social behaviour,[4] and around half of all violent crimes in the UK.[5] Binge drinking causes an extra burden on health services; between 20-40 % of people presenting to accident and emergency departments are intoxicated, increasing to 80% after midnight.[4] Recent data show that around 37% of men and 29% of women exceeded the current UK guidelines for safe levels of alcohol consumption of  $\leq 3$  units per day for women and  $\leq 4$  units per day for men in the past week; and 20% of men and 13% of women engaged in binge drinking, defined as  $> 6$  units per day for women and  $> 8$  units per day for men.[6] Given the wide range of harm resulting from this substantial level of consumption, the potential impact on health at the population level from a reduction in consumption is considerable.

Research investigating the socio-economic patterning of harmful alcohol consumption has generally found that lower socio-economic status (SES) groups drink more heavily and higher SES groups drink more frequently,[7] consistent with binge drinking being found to be more prevalent in the economically disadvantaged.[8] However, subtle variations in cut-points based on units have led to prevalence estimates for binge drinking in young men to differ by 22%,[2] and these summary SES relationships have been found to vary substantially with age, gender, educational level, employment status and the measure of consumption.[2,7-12]

In addition to socio-economic effects found at the individual level, it is theorised that small-area, or neighbourhood, socio-economic deprivation might exert an independent effect on

1  
2  
3 harmful alcohol consumption. However, a recent systematic review which included multilevel  
4  
5 studies of neighbourhood deprivation and alcohol consumption found little evidence to  
6  
7 support this hypothesis.[13] Of the four multilevel studies which were classified as rigorous in  
8  
9 a quality assessment, one study set in the West of Scotland, UK, found no significant  
10  
11 association between neighbourhood deprivation and drinking above guideline limits or the  
12  
13 number of units consumed in the past week.[14] A second study set in California, USA, found  
14  
15 that the odds of heavy alcohol consumption (>7 drinks/week for females and >14 for males)  
16  
17 was significantly higher for people living in the least deprived neighbourhoods with no  
18  
19 significant variation with individual SES.[15]  
20  
21  
22  
23  
24

25 The two other studies described an association between high neighbourhood deprivation and  
26  
27 high consumption.[16,17] Data from the nationally representative Third National Health and  
28  
29 Nutrition Examination Survey (NHANES III, USA) found that a composite neighbourhood  
30  
31 deprivation measure at the level of the census tract was associated with heavy alcohol use,  
32  
33 defined as consuming five or more drinks almost every day (odds ratio 1.18; 95% CI: 1.01,  
34  
35 1.38), but it was not reported whether this association varied with age, gender or SES.[16] A  
36  
37 second US study found that higher mean income and income inequality at the larger  
38  
39 community district level was significantly associated with a higher number of drinks per  
40  
41 month among drinkers.[17] Four subsequent papers reporting small studies found no  
42  
43 significant association between alcohol consumption and neighbourhood income,[18,19]  
44  
45 neighbourhood unemployment,[20] or a composite measure of relative socio-economic  
46  
47 disadvantage,[21] while a further large-scale study of over 90 000 subjects set in Canada  
48  
49 found a small effect of neighbourhood deprivation on the number of drinks consumed per  
50  
51 week in men, but not in women.[22]  
52  
53  
54  
55  
56  
57  
58  
59  
60



1  
2  
3 Possible explanations for these inconsistencies in neighbourhood associations found between  
4  
5 studies may result from different methods of defining excess, or harmful, consumption, with  
6  
7 some choosing definitions based on national guidelines for 'safe' consumption or units,[14]  
8  
9 number of drinks,[15-19,21,22] or frequency of consumption.[19,20] Additional explanations  
10  
11 for inconsistent neighbourhood associations may result from different measures of area  
12  
13 deprivation, sizes of neighbourhood, and adjustment for different individual-level risk factors  
14  
15 for excess alcohol consumption.[14-22]  
16  
17  
18  
19

20  
21 Despite the substantial public health consequences of alcohol consumption and the possible  
22  
23 importance of neighbourhood in explaining patterns of consumption, no previous study to our  
24  
25 knowledge has investigated multilevel associations with neighbourhood deprivation which  
26  
27 distinguish between excess consumption and binge drinking as distinct categories. Little is  
28  
29 known on whether any associations vary within population groups. The aim of the present  
30  
31 study was to investigate the joint effects of neighbourhood deprivation with age, gender and  
32  
33 SES on (1) excess alcohol consumption above guideline limits, and (2) binge drinking, in a  
34  
35 representative sample of the adult population of Wales, UK.  
36  
37  
38  
39  
40  
41  
42  
43  
44  
45  
46  
47  
48  
49  
50  
51  
52  
53  
54  
55  
56  
57  
58  
59  
60

## METHODS

### Participants

Data were drawn from four successive cross-sectional waves of the Welsh Health Survey 2003/04 to 2007, an interviewer-led household and individual survey of the adult population resident in Wales, UK.[23,24] The population of Wales is approximately 3 million (2001 Census) and the dataset available includes a total of 60 555 adults aged 18 years and over. The sampling methods and the survey process are described in detail elsewhere.[24]

### Alcohol outcome measure

Participants were asked to state the highest number of units they had drunk on any one day in the previous seven days, using a standard prompt to convert different types and quantities of alcoholic drinks into units. The dataset provided the classification of units into ordinal categories of maximal daily consumption based on the UK Department of Health definitions (Table 1), with categories for 'none/never drinks', 'within guidelines', 'excess consumption but less than binge, and 'binge'. [25]

**Table 1 Categorisation of the alcohol consumption outcome variable**

| Category                               | Maximum units drunk on any day in the last week                                                             |
|----------------------------------------|-------------------------------------------------------------------------------------------------------------|
| None/never drinks                      | Did not drink in the last seven days                                                                        |
| Within guidelines                      | Men drinking no more than 4 units, women no more than 3 units                                               |
| Excess consumption but less than binge | Men drinking more than 4 and up to and including 8 units, women more than 3 and up to and including 6 units |
| Binge                                  | Men drinking more than 8 units, women more than 6 units                                                     |

Source: reference 25

### **Neighbourhood deprivation measure**

The Welsh Index of Multiple Deprivation 2005 (WIMD2005) was used as the measure of neighbourhood deprivation.[26] WIMD2005 scores are available for lower super output areas (LSOA), a unit of statistical geography defined by the 2001 UK Census. We used the LSOA as the closest available proxy for neighbourhood. There are 1896 LSOAs in Wales which have a mean population size of around 1500 and are constrained to a minimum of 1000.

Respondents were linked to their LSOA of residence by the data owners and the dataset included 1839 LSOAs, nested within the 22 unitary authority (UA) local government areas in Wales. Each LSOA was assigned to one of five ordinal categories of WIMD2005 scores with equal counts of LSOAs in each quintile.

### **Measure of SES and potential confounding variables**

The principal measure of SES defined for the analysis was the National Statistics Socio-economic Classification (NS-SEC3) variable for the head of household, defined as the person with the highest income. The categories were: professional/managerial, intermediate, routine and manual occupations, and never worked/long-term unemployed. Age was analysed in 10-year bands by gender. We considered other measures of SES as confounding variables: individual employment status (employed, seeking work, training/student, retired, permanently sick or disabled, at home), highest educational qualification (degree, intermediate, none), and ethnicity (White, Black and minority ethnic) and housing tenure (owner occupier, social and private renting) (table 1).

1  
2  
3 Of the 60 555 respondents, 58 282 individuals living within 32 692 households completed the  
4  
5 questions on alcohol consumption, and 50 641 had complete covariate information recorded  
6  
7 in the dataset.  
8  
9

### 10 11 **Statistical Analysis**

12  
13 Since the outcome measure is an ordered categorical variable, the data were analysed using a  
14  
15 continuation ratio model,[27] which allowed estimation of the association between  
16  
17 neighbourhood deprivation and the likelihood of moving up one category of alcohol  
18  
19 consumption,  $y$ , (e.g. from excess consumption but less than binge, to binge drinking). This  
20  
21 continuation ratio approach used a linear predictor,  $\eta_k$ , to explain the probability of continuing  
22  
23 to a higher category, conditional on reaching a certain ordinal level. The linear predictor was  
24  
25 modelled by covariates  $x_k$  and fixed effects  $\beta$  :  
26  
27  
28

$$29 \text{logit } p(y > k \mid y \geq k) = \eta_k = x_k \beta$$

30  
31  
32 This extends naturally to the multilevel framework, where we adopted the random effects  
33  
34 model:  
35  
36

$$37 \text{logit } p(y > k \mid y \geq k, b) = x_k \beta + z_k b$$

38  
39  
40 where the linear predictor now has two components:  $x_k \beta$  are the fixed effects, and  $z_k b$   
41  
42 described the multilevel structure in the data. Again, in principle the influence of both fixed  
43  
44 and random effects may vary according to the level  $k$ .  
45  
46  
47  
48  
49  
50  
51  
52  
53  
54  
55  
56  
57  
58  
59  
60

1  
2  
3 We estimated the regression coefficients  $\beta$  and the covariance matrix  $\text{Var}(\beta)$  and we  
4  
5 derived  $p(y=k | \beta=0)$ , the predicted probabilities of membership of ordinal category  $k$  for the  
6  
7 median geographical context  $\beta=0$  for each quintile of deprivation and category of SES.  
8  
9

10  
11 The sequential modelling strategy started with the “null” four-level variance components  
12  
13 model, with category-specific intercepts and random effects for households, LSOAs and UAs.  
14  
15 The WIMD2005 categorical variable was fitted to estimate the unadjusted neighbourhood  
16  
17 deprivation fixed effects in model 1. NS-SEC3, age group, gender, the interaction between  
18  
19 age group and gender, and the potential confounders were then added to form model 2. The  
20  
21 final model 3 was fitted with cross-level interactions in separate models for WIMD2005  
22  
23 interacting with age group and gender, and WIMD2005 with NS-SEC3. Multiple imputation  
24  
25 of five datasets using chained equations in R software was used to account for missing  
26  
27 covariates.[28,29]  
28  
29  
30  
31  
32  
33

34 The magnitude of the variation between LSOAs and between UAs was estimated using the  
35  
36 standard deviation (SD) of their random effects, since these are measured on the same scale as  
37  
38 the fixed effects for observed covariates. The quartiles of a standard normal variable lie at +/-  
39  
40 0.67, and the differences between LSOA and between UA quartiles were computed by  
41  
42  $1.34 \times \text{SD}$  to compare with the magnitude of the estimated fixed effects for SES.  
43  
44  
45  
46  
47  
48  
49  
50  
51  
52  
53  
54  
55  
56  
57  
58  
59  
60

## RESULTS

### Descriptive analysis

Overall, 22 218 (38.1%) of the total 58 282 respondents reported their levels of alcohol consumption as 'none or never drinks', 16 059 (27.6%) reported 'within guidelines', 9664 (16.6%) reported 'excess consumption but less than binge' and 10 341 (17.7%) reported 'binge' drinking. Both excess consumption and particularly binge drinking were higher in males than females. Excess consumption was highest in the 35-64 year age groups and binge drinking was highest in 18-34 year olds, declining with increasing age (table 2). The 'never worked and long-term unemployed' group and respondents with no educational qualifications showed substantially lower levels of both excess consumption and binge drinking than the three higher NS-SEC3 socio-economic groups and those with some educational achievement. For employment status, the economically active who were employed or seeking work had higher levels of excess and binge consumption than economically inactive respondents. The proportion of respondents drinking to excess decreased with increasing neighbourhood deprivation but binge drinking showed the opposite pattern of increasing with higher deprivation (table 2).

**Table 2 Excess alcohol consumption and binge drinking by socio-economic status**

|                                         |                                         | <b>Excess<br/>consumption,<br/>less than binge</b> | <b>%</b> | <b>Binge</b> | <b>%</b> | <b>Total</b> |
|-----------------------------------------|-----------------------------------------|----------------------------------------------------|----------|--------------|----------|--------------|
| Gender                                  | Female                                  | 4702                                               | 15.0     | 3482         | 11.1     | 31261        |
|                                         | Male                                    | 4962                                               | 18.4     | 6859         | 25.4     | 27021        |
| Age group                               | 18-24                                   | 1001                                               | 14.5     | 2041         | 29.6     | 6888         |
|                                         | 25-34                                   | 1286                                               | 17.5     | 2105         | 28.7     | 7329         |
|                                         | 35-44                                   | 2007                                               | 19.6     | 2427         | 23.7     | 10225        |
|                                         | 45-54                                   | 2110                                               | 21.5     | 1931         | 19.7     | 9815         |
|                                         | 55-64                                   | 1961                                               | 19.2     | 1268         | 12.4     | 10216        |
|                                         | 65-74                                   | 951                                                | 12.4     | 444          | 5.8      | 7697         |
|                                         | 75-84                                   | 316                                                | 6.4      | 106          | 2.2      | 4923         |
|                                         | 85+                                     | 32                                                 | 2.7      | 19           | 1.6      | 1189         |
| NS-SEC3:<br>SES                         | Professional and managerial occupations | 3850                                               | 19.5     | 3354         | 17.0     | 19699        |
|                                         | Intermediate occupations                | 1742                                               | 16.1     | 1873         | 17.3     | 10802        |
|                                         | Routine and manual occupations          | 3566                                               | 14.7     | 4397         | 18.2     | 24197        |
|                                         | Never worked and long-term unemployed   | 131                                                | 8.9      | 173          | 11.8     | 1465         |
| Employment<br>status                    | Employed                                | 5766                                               | 20.9     | 6961         | 25.2     | 27571        |
|                                         | Seeking work                            | 138                                                | 14.9     | 274          | 29.6     | 925          |
|                                         | Training/student                        | 483                                                | 14.8     | 739          | 22.6     | 3273         |
|                                         | Permanently sick or disabled            | 599                                                | 13       | 547          | 11.8     | 4619         |
|                                         | Retired                                 | 1539                                               | 11.8     | 755          | 5.8      | 13091        |
|                                         | At home                                 | 696                                                | 13.2     | 507          | 9.6      | 5284         |
|                                         | Other                                   | 276                                                | 14.9     | 349          | 18.8     | 1856         |
| Highest<br>educational<br>qualification | No qualifications                       | 2140                                               | 12.6     | 2095         | 12.3     | 17026        |
|                                         | Intermediate qualifications             | 5405                                               | 18.3     | 6428         | 21.7     | 29601        |
|                                         | Degree/degree equivalent and above      | 1773                                               | 21.5     | 1445         | 17.5     | 8247         |
| Tenure                                  | Owner occupier                          | 8010                                               | 17.5     | 7883         | 17.2     | 45725        |
|                                         | Social renting                          | 956                                                | 11.8     | 1340         | 16.5     | 8123         |
|                                         | Private renting / Other                 | 663                                                | 15.6     | 1085         | 25.5     | 4262         |
| Ethnicity                               | White                                   | 9492                                               | 16.8     | 10165        | 18.0     | 56438        |
|                                         | Black and minority ethnic               | 108                                                | 8.8      | 100          | 8.2      | 1222         |
| WIMD2005:<br>Deprivation<br>quintile    | Least deprived                          | 2304                                               | 19.5     | 1967         | 16.7     | 11786        |
|                                         | Less deprived                           | 2111                                               | 17.2     | 1927         | 15.7     | 12267        |
|                                         | Mid deprived                            | 2063                                               | 16.0     | 2219         | 17.2     | 12875        |
|                                         | More deprived                           | 1726                                               | 15.0     | 2234         | 19.4     | 11544        |
|                                         | Most deprived                           | 1460                                               | 14.9     | 1994         | 20.3     | 9810         |

### Multilevel models

The unadjusted predicted probabilities for the five neighbourhood deprivation quintiles in model 1 are shown in table 3. As with the descriptive analysis, the probability of excess consumption was higher in less deprived neighbourhoods with decreasing probability across the quintiles of deprivation. Binge drinking showed the opposite pattern of increasing probability with higher deprivation. The differences in magnitude between the model predicted probabilities and the descriptive data shown in table 2 are explained by the addition of the random effects in model 1.

After including NS-SEC3, age group and gender, and the confounding variables in model 2, the adjusted difference between the deprivation quintiles for binge drinking increased, with less effect on the excess consumption category (table 3): respondents in the most deprived neighbourhoods were more likely to binge drink than in the least deprived (adjusted estimates: 17.5% vs. 10.6%; difference in proportions = 6.9%, 95% CI: 6.0 to 7.8), but were less likely to report excess consumption (17.6% vs. 21.3%; difference in proportions = 3.7%, 95% CI: 2.6 to 4.8).

Table 3 shows the predicted probabilities of consumption for the NS-SEC3 categories in the fully adjusted model 2. There was little difference in excess consumption with SES. The descriptive analysis finding of a higher probability of binge drinking in the three higher SES groups compared to the never worked/long-term unemployed category remained after adjustment.



**Table 3 Model parameter estimates and predicted probabilities (%) for excess alcohol consumption and binge drinking for neighbourhood deprivation and SES**

|                                            | Parameter estimate (SE) | Excess consumption, less than binge % | Binge % |
|--------------------------------------------|-------------------------|---------------------------------------|---------|
| <b>Model 1<sup>a</sup></b>                 |                         |                                       |         |
| <b>WIMD2005:</b>                           |                         |                                       |         |
| <b>Neighbourhood deprivation quintiles</b> |                         |                                       |         |
| Least deprived                             | Reference               | 22.2                                  | 9.7     |
| Less deprived                              | -0.2042* (0.0372)       | 20.1                                  | 9.9     |
| Mid deprived                               | -0.4105* (0.0370)       | 19.1                                  | 11.2    |
| More deprived                              | -0.6544* (0.0375)       | 17.6                                  | 12.6    |
| Most deprived                              | -0.8526* (0.0391)       | 17.2                                  | 12.6    |
| <b>Model 2<sup>b</sup></b>                 |                         |                                       |         |
| <b>WIMD2005:</b>                           |                         |                                       |         |
| <b>Neighbourhood deprivation quintiles</b> |                         |                                       |         |
| Least deprived                             | Reference               | 21.3                                  | 10.6    |
| Less deprived                              | -0.1973* (0.0387)       | 19.5                                  | 11.1    |
| Mid deprived                               | -0.3879* (0.0386)       | 18.8                                  | 13.0    |
| More deprived                              | -0.6073* (0.0395)       | 17.5                                  | 15.3    |
| Most deprived                              | -0.7142* (0.0421)       | 17.6                                  | 17.5    |
| <b>NS-SEC3: SES</b>                        |                         |                                       |         |
| Professional/managerial                    | Reference               | 19.8                                  | 14.6    |
| Intermediate                               | -0.0973* (0.0265)       | 19.0                                  | 13.0    |
| Routine occupations                        | -0.1519* (0.0226)       | 18.6                                  | 12.2    |
| Never worked/long-term unemployed          | -0.3339* (0.0614)       | 17.1                                  | 9.7     |

a Model 1 included fixed effects terms for WIMD2005 deprivation quintiles and random effects terms for household, LSOA and unitary authority

b Model 2 included NS-SEC3, age group, gender, age group\*gender, and adjusted for employment status, highest educational qualification, ethnicity, and housing tenure

\* p<0.001

1  
2  
3 The two-way cross-level interaction between WIMD2005, age group and gender showed the  
4 effect of neighbourhood deprivation on the probability of excess consumption and binge  
5 drinking varied significantly between age group and gender. The model outputs are shown on  
6 the probability scale for ease of interpretation in figures 1 and 2. Little evidence of a cross-  
7 level interaction in females or older age groups was found for either excess consumption or  
8 binge drinking. Males had a higher probability of excess consumption in low deprivation  
9 quintiles than females. Although the probability of binge drinking in females increased with  
10 increasing deprivation quintile, the gradients were significantly steeper in males. The  
11 probability of binge drinking was highest at all levels of neighbourhood deprivation in males  
12 aged 18 to 34, and the interaction effect was largest in the 35-64 year age groups. The cross-  
13 level interaction between WIMD2005 and NS-SEC3 was not significant suggesting that the  
14 association of excess consumption and binge drinking with neighbourhood deprivation did  
15 not vary with SES.  
16  
17  
18  
19  
20  
21  
22  
23  
24  
25  
26  
27  
28  
29  
30  
31  
32  
33

#### 34 Random effects variance

35  
36 The majority of the unexplained random variation occurred at the household level (table 4).  
37 For LSOAs, in model 2, the SD = 0.156 giving the inter-quartile range = 0.21. This compares  
38 to a parameter estimate of -0.33 for the 'never worked' category of NS-SEC3, of -0.15 for  
39 'routine' occupations and -0.10 for the 'intermediate' category, compared to the  
40 professional/managerial category (table 3). The size of this variation suggests there is  
41 important unexplained variation that can be attributed to LSOAs. Similarly, for UAs, the  
42 inter-quartile range = 0.16, suggesting that the magnitude of the UA random variation,  
43 although smaller than LSOA, remains of importance in explaining the spatial pattern of  
44 alcohol consumption.  
45  
46  
47  
48  
49  
50  
51  
52  
53  
54  
55  
56  
57  
58  
59  
60

**Table 4 Random effects variance in sequential multilevel models**

|                      | <b>Level</b> | <b>Variance</b> | <b>SD</b> |
|----------------------|--------------|-----------------|-----------|
| Null model           | HH           | 0.809           | 0.899     |
|                      | LSOA         | 0.032           | 0.179     |
|                      | UA           | 0.017           | 0.130     |
| Model 1 <sup>a</sup> | HH           | 0.824           | 0.908     |
|                      | LSOA         | 0.028           | 0.167     |
|                      | UA           | 0.019           | 0.139     |
| Model 2 <sup>b</sup> | HH           | 0.867           | 0.931     |
|                      | LSOA         | 0.024           | 0.156     |
|                      | UA           | 0.015           | 0.121     |
| Model 3 <sup>c</sup> | HH           | 0.866           | 0.931     |
|                      | LSOA         | 0.023           | 0.153     |
|                      | UA           | 0.014           | 0.120     |

a Model 1 included fixed effects terms for WIMD2005 deprivation quintiles and random effects terms for household, LSOA and unitary authority

b Model 2 included NS-SEC3, age group, gender, age group\*gender, and adjusted for employment status, highest educational qualification, ethnicity, and housing tenure

c Model 3 further included the two-way cross-level interaction between WIMD2005 deprivation quintile, age group and gender

## DISCUSSION

### Main results

The current study has investigated the difference in associations between neighbourhood deprivation and excess alcohol consumption and binge drinking as ordinal categories, based on the UK definition,[25] since it has been suggested that it is more appropriate to set benchmarks for daily than for weekly consumption of alcohol following greater concern about the health and social risks associated with single episodes of intoxication.[6] Excess consumption was more common in less deprived neighbourhoods. In contrast, binge drinking was more common in deprived neighbourhoods. These findings add to the previous US and Canadian studies which showed a significant neighbourhood effect,[16,17,22] by further assessing the complex interacting effects of neighbourhood deprivation with consumption category, age and gender, and SES. The joint effect of neighbourhood deprivation with age and gender was greatest for binge drinking in middle-aged males with no significant interaction with SES. We also found a substantial geographical effect of neighbourhood, since the magnitude of the unexplained variance in alcohol consumption was similar to the effect sizes of individual SES.

### Possible mechanisms linking neighbourhood deprivation to harmful alcohol consumption

Three mechanisms have been proposed to explain how neighbourhood deprivation might exert an independent effect on the risk of harmful alcohol consumption, and a differential effect on middle-aged males.[16] First, the contagion hypothesis suggests that health behaviours are spread by social exchange and particularly social networks of personal friends. Thus, binge drinking may be more acceptable in middle-aged men resident in deprived neighbourhoods than in the non-deprived. Second, the stress of living in areas of high

1  
2  
3 neighbourhood disadvantage may make men more vulnerable to psychological distress. This  
4  
5 then increases the risk that alcohol is used as a coping mechanism.  
6  
7

8  
9  
10 Third, the structural hypothesis argues that neighbourhood social norms and institutions  
11  
12 define the pattern of health behaviours. Greater availability of cheap alcohol measured as  
13  
14 higher alcohol outlet densities might influence harmful drinking rates, although the evidence  
15  
16 summarised in systematic reviews of both cross-sectional and longitudinal studies is  
17  
18 inconsistent.[30] There is some evidence that high deprivation neighbourhoods have a higher  
19  
20 density of alcohol outlets,[15,31,32] and this might provide a mechanism to explain higher  
21  
22 consumption in deprived neighbourhoods. However, two studies which found higher outlet  
23  
24 densities in more deprived areas found that levels of consumption were highest in less  
25  
26 deprived areas.[15,31] A third study found the spatial association between outlet density and  
27  
28 deprivation did not vary systematically, suggesting the relationship between deprivation and  
29  
30 outlet density may be different in different locations.[32] This deprivation-density hypothesis  
31  
32 could not explain the findings of higher rates of excess consumption in the least deprived  
33  
34 neighbourhoods in the current study. One possibility is the acceptance of social norms of  
35  
36 regular drinking to excess, but not episodic binge drinking, in less deprived areas compared to  
37  
38 a different set of social normative binge drinking behaviour in the most deprived areas.  
39  
40  
41  
42  
43  
44

#### 45 **Strengths and limitations**

46  
47 Since 2003/04, the Welsh Health Survey has been an annual source of robust population  
48  
49 survey data. It has the important strength of a large sampling fraction resulting in a  
50  
51 representative response dataset that includes around one in fifty of the socially diverse Welsh  
52  
53 adult population, with detailed exposure data linked to the small-area neighbourhood. The  
54  
55 study findings from such a comprehensive dataset should be more widely generalisable.  
56  
57  
58  
59  
60

1  
2  
3 Several limitations should be considered. The alcohol consumption outcome measure was  
4  
5 based on a widely used definition published by the UK Department of Health.[25] However,  
6  
7 the possibility of social desirability bias resulting in under-reported alcohol consumption  
8  
9 should be considered,[33,34] although it is not known whether under-reporting varies  
10  
11 between neighbourhoods. The questionnaire responses were consistent year-on-year from four  
12  
13 different successive samples, suggesting that responses were reliable. Non-response bias was  
14  
15 a possibility but the surveys had a consistently good overall response to the interviewer-led  
16  
17 method, from 74% of sampled households and 85% of individuals within responding  
18  
19 households in 2003/04,[24] to 74% and 82% respectively in 2010.[35]  
20  
21  
22  
23  
24

25 The administratively defined census LSOA was used as a proxy for 'neighbourhood'.  
26  
27 However, the direction of bias from using non-homogeneous administrative areas is towards  
28  
29 conservative estimates.[36,37] Therefore it is unlikely that the current study over-estimated  
30  
31 the associations between alcohol consumption and neighbourhood deprivation. Finally, no  
32  
33 inferences about causal processes can be made. Reverse cause, for example, could suggest  
34  
35 that binge drinking causes a decline in social position, but this explanation seems unlikely for  
36  
37 excess alcohol consumption in which the associations were in the opposite direction to binge  
38  
39 drinking.  
40  
41  
42  
43  
44

45 In conclusion, the socio-economic patterning of excess alcohol consumption and binge  
46  
47 drinking was complex. The study findings have implications for enhancing public health  
48  
49 alcohol policy development, emphasising the importance of neighbourhood. Further  
50  
51 longitudinal research on the spatial relationships between alcohol consumption, outlet density,  
52  
53 and socio-economic deprivation at individual and neighbourhood levels is necessary to further  
54  
55  
56  
57  
58  
59  
60

1  
2  
3 understand the underlying processes and provide further evidence for local and national  
4  
5 policies to reduce alcohol-related harm.[38]  
6  
7  
8  
9  
10  
11  
12  
13  
14  
15  
16  
17  
18  
19  
20  
21  
22  
23  
24  
25  
26  
27  
28  
29  
30  
31  
32  
33  
34  
35  
36  
37  
38  
39  
40  
41  
42  
43  
44  
45  
46  
47  
48  
49  
50  
51  
52  
53  
54  
55  
56  
57  
58  
59  
60

For peer review only

## COMPETING INTERESTS

None

## FUNDING

This work was supported by the Office of the Chief Social Research Officer (OCSRO), Welsh Government. [grant number 081218 SAP].

The work was undertaken at The Centre for the Development and Evaluation of Complex Interventions for Public Health Improvement, a UKCRC Public Health Research: Centre of Excellence. Funding from the British Heart Foundation, Cancer Research UK, Economic and Social Research Council (RES-590-28-0005), Medical Research Council, the Welsh Assembly Government and the Wellcome Trust (WT087640MA), under the auspices of the UK Clinical Research Collaboration, is gratefully acknowledged.

## Information Governance and data sharing

A formal data access agreement was signed with the Welsh Government in order to receive the dataset with the geographical variables for analysis. These data can only be accessed under such an agreement. There are no additional data available. Ethical approval was not required for this secondary analysis of an anonymised dataset.

## Contributorship

All authors contributed to the design of the study. DLF is principal investigator and wrote the first draft of the paper with JW. DMF carried out the statistical modelling, supported by FD. JW carried out the literature reviews. All authors contributed to the critical revision of the manuscript and read and approved the final version.



**REFERENCES**

- [1] Rehm J, Mathers C, Popova S, et al. Global burden of disease and injury and economic cost attributable to alcohol use and alcohol use disorders. *Lancet* 2009;**373**:2223-33.
- [2] McAlaney J, McMahon J. Establishing rates of binge drinking in the UK : Anomalies in the data. *Alcohol Alcohol* 2006;**41**:355-57.
- [3] Smith L, Foxcroft D. *Drinking in the UK. An exploration of trends*. York: Joseph Rowntree Foundation 2009. ISBN: 978-1-85935-698-2.
- [4] Hayward R, Sharp C. *Young people, crime and anti-social behaviour: findings from the 2003 Crime and Justice Survey. Home Office Research Findings 245*. London: Home Office 2005. ISSN 1473-8406.
- [5] Richardson A, Budd T. *Home Office Research Studies 263. Alcohol, crime and disorder: a study of young adults*. London: Home Office 2003. ISBN-1-84082-961-3.
- [6] Robinson S, Harris H. *Smoking and drinking among adults, 2009. A report on the 2009 General Lifestyle Survey*. London: Office for National Statistics 2011.
- [7] Huckle T, You RQ, Casswell S. Socio-economic status predicts drinking patterns but not alcohol-related consequences independently. *Addiction* 2010;**105**:1192-202.
- [8] Kuntsche E, Rehm J, Gmel G. Characteristics of binge drinkers in Europe. *Soc Sci Med* 2004;**59**:113-27.

1  
2  
3 [9] Jefferis BJ, Manor O, Power C. Social gradients in binge drinking and abstaining: trends  
4  
5 in a cohort of British adults. *J Epidemiol Community Health* 2007;**61**:150-3.  
6  
7

8  
9 [10] Marmot M. Inequality, deprivation and alcohol use. *Addiction* 1997;**92**:S13-S20.  
10  
11

12  
13 [11] Van Oers J. Alcohol consumption, alcohol-related problems, problem drinking, and  
14  
15 socioeconomic status. *Alcohol Alcoholism* 1999;**34**:78-88.  
16  
17

18  
19 [12] Hart C, Ecob R, Smith GD. People, places and coronary heart disease risk factors: a  
20  
21 multilevel analysis of the Scottish Heart Health Study archive. *Soc Sci Med* 1997;**45**:893-902.  
22  
23

24  
25 [13] Karriker-Jaffe KJ. Areas of disadvantage: a systematic review of effects of area-level  
26  
27 socioeconomic status on substance use outcomes. *Drug Alcohol Rev* 2011;**30**:84-95.  
28  
29

30  
31 [14] Ecob R, Macintyre S. Small area variations in health related behaviours; do these depend  
32  
33 on the behaviour itself, its measurement, or on personal characteristics? *Health Place*  
34  
35 2000;**6**:261-74.  
36  
37

38  
39 [15] Pollack CE, Cubbin C, Ahn D, et al. Neighbourhood deprivation and alcohol  
40  
41 consumption: does the availability of alcohol play a role? *Int J Epidemiol* 2005;**34**:772-80.  
42  
43

44  
45 [16] Stimpson JP, Ju H, Raji MA, et al. Neighborhood deprivation and health risk behaviors  
46  
47 in NHANES III. *Am J Health Behav* 2007;**31**:215-22.  
48  
49

1  
2  
3 [17] Galea S, Ahern J, Tracy M, et al. Neighborhood income and income distribution and the  
4 use of cigarettes, alcohol, and marijuana. *Am J Prev Med* 2007;**32**:S195-202.  
5  
6

7  
8  
9 [18] Cornaz S, Taffe P, Santos-Eggimann B. Life-course socioeconomic environment and  
10 health risk behaviours. A multilevel small-area analysis of young-old persons in an urban  
11 neighbourhood in Lausanne, Switzerland. *Health Place* 2009;**15**:273-83.  
12  
13

14  
15  
16 [19] Giskes K, Turrell G, Bentley R, et al. Individual and household-level socioeconomic  
17 position is associated with harmful alcohol consumption behaviours among adults. *Aust NZ J*  
18 *Publ Heal* 2011;**35**:270-7.  
19  
20  
21  
22  
23

24  
25  
26 [20] Dzurova D, Spilkova J, Pikhart H. Social inequalities in alcohol consumption in the  
27 Czech Republic: a multilevel analysis. *Health Place* 2010;**16**:590-7.  
28  
29  
30

31  
32  
33 [21] Adams RJ, Howard N, Tucker G, et al. Effects of area deprivation on health risks and  
34 outcomes: a multilevel cross-sectional, Australian population study. *Int J Public Health*  
35 2009;**54**:183-92.  
36  
37  
38  
39

40  
41  
42 [22] Matheson FI, White HL, Moineddin R, et al. Drinking in context: the influence of gender  
43 and neighbourhood deprivation on alcohol consumption. *J Epidemiol Community Health*  
44 2012;**66**:e4. Epub 2011 Feb 17.  
45  
46  
47  
48  
49  
50  
51  
52  
53  
54  
55  
56  
57  
58  
59  
60

1  
2  
3 [23] Doyle-Francis M, Sadler K, Kingdon A, et al. *Welsh Health Survey User Guide*. National  
4  
5 Centre for Social Research, Welsh Assembly Government 2011.

6  
7 <http://wales.gov.uk/docs/statistics/2011/110127surveyguideen.pdf> (accessed 22 October  
8  
9 2012).

10  
11  
12  
13  
14 [24] McGee A, Jotangia D, Prescott A, et al. *Welsh Health Survey - Year One Technical*  
15  
16 *Report*. National Centre for Social Research 2005.

17  
18 <http://wales.gov.uk/docs/statistics/2005/050701healthsurvey0304techen.pdf> (accessed 22  
19  
20 October 2012).

21  
22  
23  
24  
25 [25] Department of Health, Home Office, Department for Education and Skills and  
26  
27 Department for Culture, Media and Sport. *Safe. Sensible. Social. The next steps in the*  
28  
29 *National Alcohol Strategy*. London: DH Publications 2007:3.

30  
31 [http://www.dh.gov.uk/prod\\_consum\\_dh/groups/dh\\_digitalassets/@dh/@en/documents/digital](http://www.dh.gov.uk/prod_consum_dh/groups/dh_digitalassets/@dh/@en/documents/digital)  
32  
33 [asset/dh\\_075219.pdf](http://www.dh.gov.uk/prod_consum_dh/groups/dh_digitalassets/@dh/@en/documents/digital) (accessed 22 October 2012).

34  
35  
36  
37  
38 [26] Welsh Assembly Government. *Welsh Index of Multiple Deprivation 2005: Technical*  
39  
40 *report*

41  
42 <http://wales.gov.uk/cisd/publications/statspubs/wimd2005technical/en.pdf?lang=en> (accessed  
43  
44 22 October 2012).

45  
46  
47  
48  
49 [27] Agresti A. *An introduction to categorical data analysis*. 2<sup>nd</sup> ed. Hoboken, New Jersey:  
50  
51 John Wiley & Sons, Inc 2007.

1  
2  
3 [28] White IR, Royston P, Wood AM. Multiple imputation using chained equations: Issues  
4 and guidance for practice. *Stat Med* 2010;**30**:377-99.  
5  
6

7  
8  
9 [29] van Buuren S, Groothuis-Oudshoorn K. mice: Multivariate Imputation by Chained  
10 Equations in R. *Journal of Statistical Software* 2011;**45**:1-67.  
11  
12

13  
14  
15 [30] Popova S, Giesbrecht N, Bekmuradov D, et al. Hours and days of sale and density of  
16 alcohol outlets: Impacts on alcohol consumption and damage: A systematic review. *Alcohol*  
17 *Alcohol* 2009;**44**:500-16.  
18  
19  
20  
21

22  
23  
24 [31] Huckle T, Huakau J, Sweetsur P, et al. Density of alcohol outlets and teenage drinking:  
25 Living in an alcogenic environment is associated with higher consumption in a metropolitan  
26 setting. *Addiction* 2008;**103**:1614-21.  
27  
28  
29  
30

31  
32  
33 [32] Ellaway A, Macdonald L, Forsyth A, et al. The socio-spatial distribution of alcohol  
34 outlets in Glasgow city. *Health Place* 2010;**16**:167-72.  
35  
36  
37  
38

39  
40 [33] Embree BG, Whitehead PC. Validity and reliability of self-reported drinking behavior:  
41 dealing with the problem of response bias. *J Stud Alcohol* 1993;**54**:334-44.  
42  
43  
44  
45

46  
47 [34] Stockwell T, Donath S, Cooper-Stanbury M, et al.  
48 Under-reporting of alcohol consumption in household surveys: a comparison of quantity-  
49 frequency, graduated-frequency and recent recall. *Addiction* 2004;**99**:1024-33.  
50  
51  
52  
53  
54  
55  
56  
57  
58  
59  
60

1  
2  
3 [35] Fuller E, Heeks F. *Welsh Health Survey 2007 Technical Report*. National Centre for  
4  
5 Social Research 2005.

6  
7 <http://wales.gov.uk/topics/statistics/publications/publication->  
8  
9 [archive/healthsurvey2007tech/?lang=en](http://wales.gov.uk/topics/statistics/publications/publication-archive/healthsurvey2007tech/?lang=en) (accessed 22 October 2012).

10  
11  
12  
13  
14 [36] Blakely TA, Woodward AJ. Ecological effects in multi-level studies. *J Epidemiol*  
15  
16 *Community Health* 2000;**54**:367-74.

17  
18  
19  
20  
21 [37] Stafford M, Duke-Williams O, Shelton N. Small area inequalities in health: Are we  
22  
23 underestimating them? *Soc Sci Med* 2008;**67**:891-9.

24  
25  
26  
27 [38] Fone DL, Dunstan FD, Webster C, et al. Change in alcohol outlet density and alcohol-  
28  
29 related harm to population health (CHALICE). *BMC Public Health* 2012;**12**:428  
30  
31  
32  
33  
34  
35  
36  
37  
38  
39  
40  
41  
42  
43  
44  
45  
46  
47  
48  
49  
50  
51  
52  
53  
54  
55  
56  
57  
58  
59  
60

1  
2  
3 **LIST OF TITLES FOR FIGURES**  
4  
5  
6

7 Figure 1 Estimated probabilities of excess alcohol consumption by age group and gender  
8 within deprivation quintiles  
9  
10

11  
12  
13  
14 Figure 2 Estimated probabilities of binge drinking by age group and gender within  
15 deprivation quintiles  
16  
17  
18  
19  
20  
21  
22  
23  
24  
25  
26  
27  
28  
29  
30  
31  
32  
33  
34  
35  
36  
37  
38  
39  
40  
41  
42  
43  
44  
45  
46  
47  
48  
49  
50  
51  
52  
53  
54  
55  
56  
57  
58  
59  
60

Figure 1: Estimated probabilities of excess alcohol consumption by age group and gender within deprivation quintiles

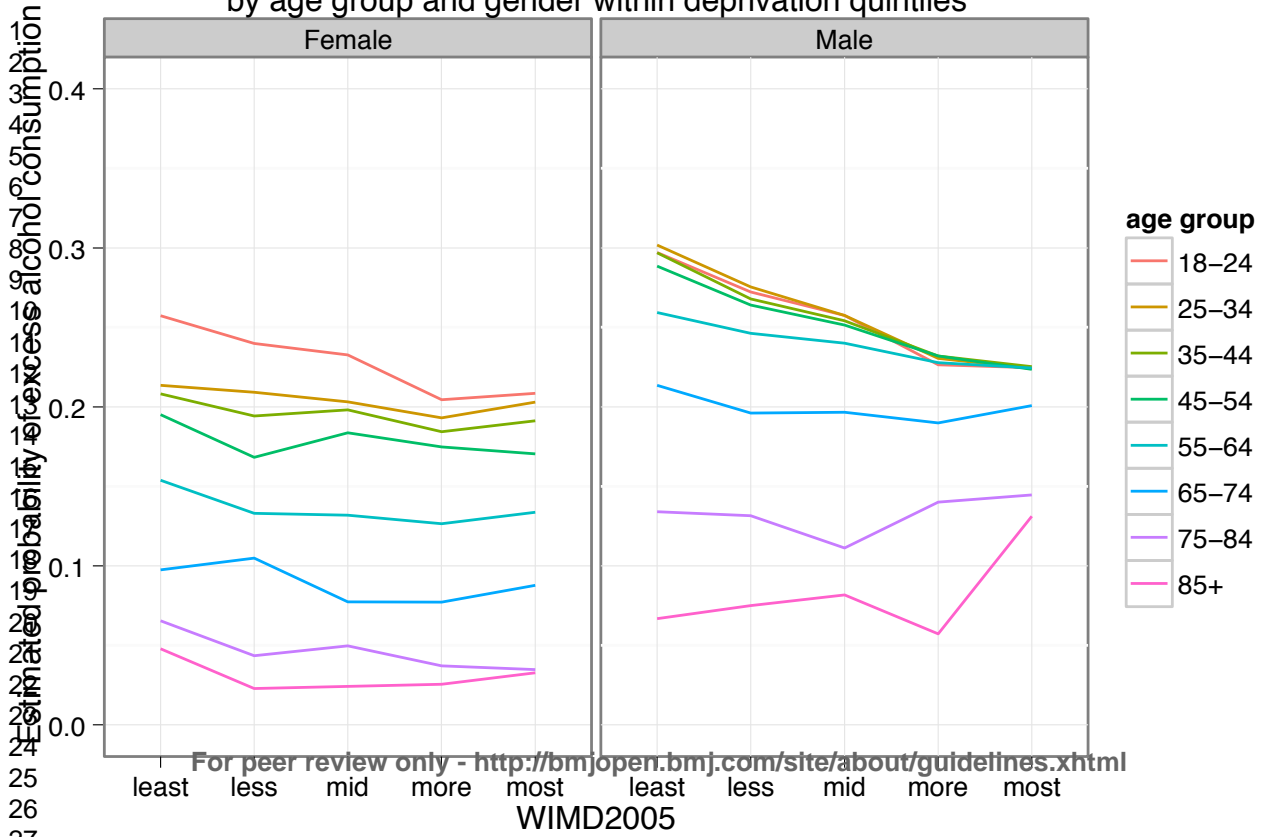



Figure 2: Estimated probabilities of binge drinking by age group and gender within deprivation quintiles

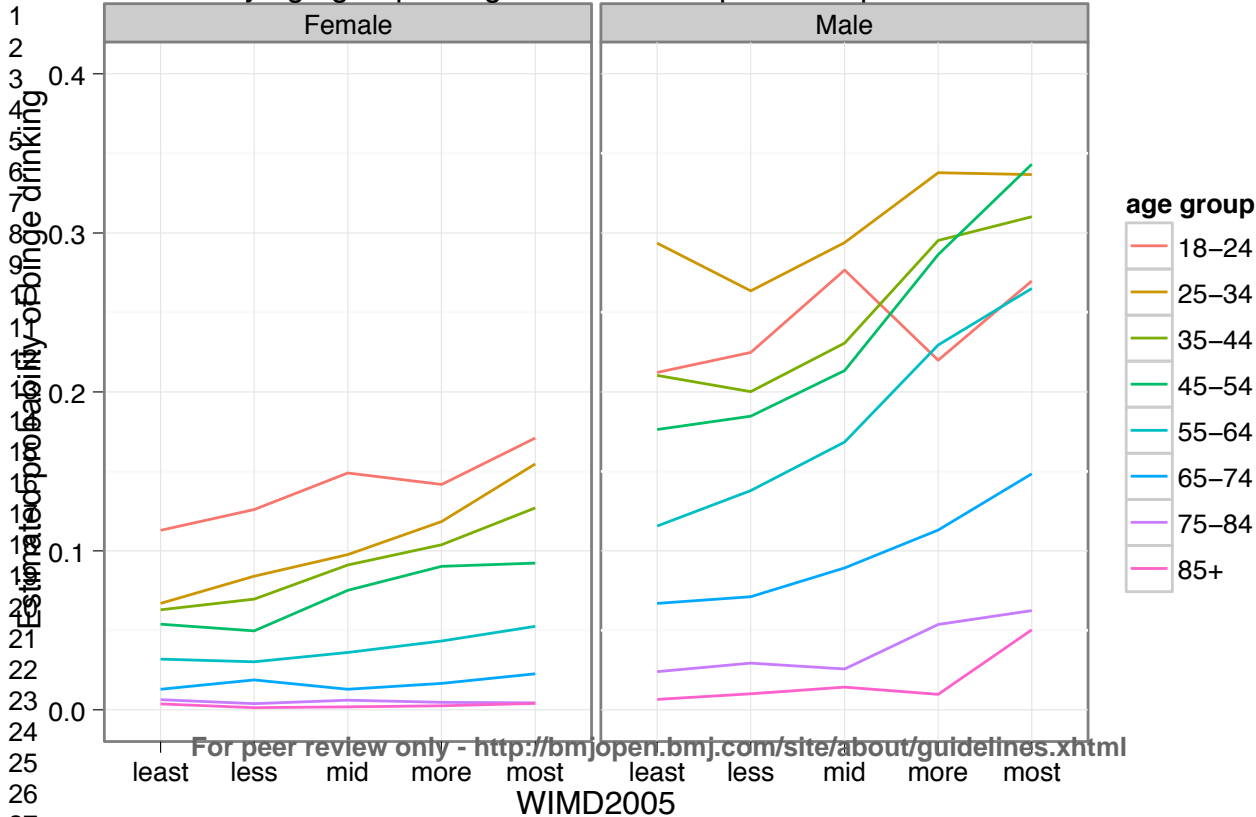

STROBE Statement—Checklist of items that should be included in reports of *cross-sectional studies*

|                              | DONE?            | Item No | Recommendation                                                                                                                                                                                    |
|------------------------------|------------------|---------|---------------------------------------------------------------------------------------------------------------------------------------------------------------------------------------------------|
| <b>Title and abstract</b>    | √                | 1       | (a) Indicate the study's design with a commonly used term in the title or the abstract                                                                                                            |
|                              | √                |         | (b) Provide in the abstract an informative and balanced summary of what was done and what was found                                                                                               |
| <b>Introduction</b>          |                  |         |                                                                                                                                                                                                   |
| Background/rationale         | √                | 2       | Explain the scientific background and rationale for the investigation being reported                                                                                                              |
| Objectives                   | √                | 3       | State specific objectives, including any prespecified hypotheses                                                                                                                                  |
| <b>Methods</b>               |                  |         |                                                                                                                                                                                                   |
| Study design                 | √                | 4       | Present key elements of study design early in the paper                                                                                                                                           |
| Setting                      | √                | 5       | Describe the setting, locations, and relevant dates, including periods of recruitment, exposure, follow-up, and data collection                                                                   |
| Participants                 | √                | 6       | (a) Give the eligibility criteria, and the sources and methods of selection of participants                                                                                                       |
| Variables                    | √                | 7       | Clearly define all outcomes, exposures, predictors, potential confounders, and effect modifiers. Give diagnostic criteria, if applicable                                                          |
| Data sources/<br>measurement | √                | 8*      | For each variable of interest, give sources of data and details of methods of assessment (measurement). Describe comparability of assessment methods if there is more than one group              |
| Bias                         | √                | 9       | Describe any efforts to address potential sources of bias                                                                                                                                         |
| Study size                   | √                | 10      | Explain how the study size was arrived at                                                                                                                                                         |
| Quantitative variables       | √                | 11      | Explain how quantitative variables were handled in the analyses. If applicable, describe which groupings were chosen and why                                                                      |
| Statistical methods          | √                | 12      | (a) Describe all statistical methods, including those used to control for confounding                                                                                                             |
|                              | √                |         | (b) Describe any methods used to examine subgroups and interactions                                                                                                                               |
|                              | √                |         | (c) Explain how missing data were addressed                                                                                                                                                       |
|                              | √                |         | (d) If applicable, describe analytical methods taking account of sampling strategy                                                                                                                |
|                              | √                |         | (e) Describe any sensitivity analyses                                                                                                                                                             |
| <b>Results</b>               |                  |         |                                                                                                                                                                                                   |
| Participants                 | √                | 13*     | (a) Report numbers of individuals at each stage of study—eg numbers potentially eligible, examined for eligibility, confirmed eligible, included in the study, completing follow-up, and analysed |
|                              | N/known          |         | (b) Give reasons for non-participation at each stage                                                                                                                                              |
|                              | Would add little |         | (c) Consider use of a flow diagram                                                                                                                                                                |
| Descriptive data             | √                | 14*     | (a) Give characteristics of study participants (eg demographic,                                                                                                                                   |

|                          |                                                  |     |                                                                                                                                                                                                              |
|--------------------------|--------------------------------------------------|-----|--------------------------------------------------------------------------------------------------------------------------------------------------------------------------------------------------------------|
|                          |                                                  |     | clinical, social) and information on exposures and potential confounders                                                                                                                                     |
|                          | √                                                |     | (b) Indicate number of participants with missing data for each variable of interest                                                                                                                          |
| Outcome data             | √                                                | 15* | Report numbers of outcome events or summary measures                                                                                                                                                         |
| Main results             | √                                                | 16  | (a) Give unadjusted estimates and, if applicable, confounder-adjusted estimates and their precision (eg, 95% confidence interval). Make clear which confounders were adjusted for and why they were included |
|                          | √ (equal count method for small-area boundaries) |     | (b) Report category boundaries when continuous variables were categorized                                                                                                                                    |
|                          | N/A                                              |     | (c) If relevant, consider translating estimates of relative risk into absolute risk for a meaningful time period                                                                                             |
| Other analyses           | √                                                | 17  | Report other analyses done—eg analyses of subgroups and interactions, and sensitivity analyses                                                                                                               |
| <b>Discussion</b>        |                                                  |     |                                                                                                                                                                                                              |
| Key results              | √                                                | 18  | Summarise key results with reference to study objectives                                                                                                                                                     |
| Limitations              | √                                                | 19  | Discuss limitations of the study, taking into account sources of potential bias or imprecision. Discuss both direction and magnitude of any potential bias                                                   |
| Interpretation           | √                                                | 20  | Give a cautious overall interpretation of results considering objectives, limitations, multiplicity of analyses, results from similar studies, and other relevant evidence                                   |
| Generalisability         | √                                                | 21  | Discuss the generalisability (external validity) of the study results                                                                                                                                        |
| <b>Other information</b> |                                                  |     |                                                                                                                                                                                                              |
| Funding                  | √                                                | 22  | Give the source of funding and the role of the funders for the present study and, if applicable, for the original study on which the present article is based                                                |

\*Give information separately for exposed and unexposed groups.

**Note:** An Explanation and Elaboration article discusses each checklist item and gives methodological background and published examples of transparent reporting. The STROBE checklist is best used in conjunction with this article (freely available on the Web sites of PLoS Medicine at <http://www.plosmedicine.org/>, Annals of Internal Medicine at <http://www.annals.org/>, and Epidemiology at <http://www.epidem.com/>). Information on the STROBE Initiative is available at [www.strobe-statement.org](http://www.strobe-statement.org).

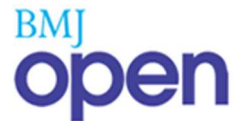

**Socioeconomic patterning of excess alcohol consumption and binge drinking: a cross-sectional study of multilevel associations with neighbourhood deprivation**

|                                 |                                                                                                                                                                                                                                                                                                                                                                                                                                               |
|---------------------------------|-----------------------------------------------------------------------------------------------------------------------------------------------------------------------------------------------------------------------------------------------------------------------------------------------------------------------------------------------------------------------------------------------------------------------------------------------|
| Journal:                        | <i>BMJ Open</i>                                                                                                                                                                                                                                                                                                                                                                                                                               |
| Manuscript ID:                  | bmjopen-2012-002337.R1                                                                                                                                                                                                                                                                                                                                                                                                                        |
| Article Type:                   | Research                                                                                                                                                                                                                                                                                                                                                                                                                                      |
| Date Submitted by the Author:   | 17-Jan-2013                                                                                                                                                                                                                                                                                                                                                                                                                                   |
| Complete List of Authors:       | Fone, David; Cardiff University, Institute of Primary Care & Public Health<br>Farewell, Daniel; Cardiff University, Institute of Primary Care & Public Health<br>White, James; Cardiff University, Centre for the Development and Evaluation of Complex Interventions for Public Health Improvement<br>Lyons, Ronan; Swansea University, College of Medicine<br>Dunstan, Frank; Cardiff University, Institute of Primary Care & Public Health |
| <b>Primary Subject Heading</b>: | Epidemiology                                                                                                                                                                                                                                                                                                                                                                                                                                  |
| Secondary Subject Heading:      | Public health                                                                                                                                                                                                                                                                                                                                                                                                                                 |
| Keywords:                       | EPIDEMIOLOGY, PUBLIC HEALTH, PREVENTIVE MEDICINE                                                                                                                                                                                                                                                                                                                                                                                              |
|                                 |                                                                                                                                                                                                                                                                                                                                                                                                                                               |

SCHOLARONE™  
Manuscripts

only

1  
2  
3 **Socioeconomic patterning of excess alcohol consumption and**  
4  
5  
6 **binge drinking: a cross-sectional study of multilevel associations**  
7  
8  
9 **with neighbourhood deprivation**  
10

11  
12  
13 David L Fone<sup>1</sup> MD

14 Daniel M Farewell<sup>1</sup> PhD

15  
16 James White<sup>2</sup> PhD

17  
18 Ronan A Lyons<sup>3</sup> MD

19  
20 Frank D Dunstan<sup>1</sup> DPhil  
21  
22  
23  
24  
25

26 1. Institute of Primary Care & Public Health, School of Medicine, Heath Park, Cardiff  
27 University, Cardiff, CF14 4YS, UK  
28

29 2. Centre for the Development and Evaluation of Complex Public Health Interventions,  
30 School of Medicine, Cardiff University, Heath Park, Cardiff, CF14 4YS, UK  
31  
32

33 3. College of Medicine, Swansea University, Swansea SA2 8PP, UK  
34  
35  
36  
37  
38

39 Corresponding author:

40 Professor David L Fone

41 Institute of Primary Care & Public Health, School of Medicine, 4th Floor Neuadd

42 Merionnydd, Heath Park, Cardiff University, Cardiff, CF14 4YS, UK  
43  
44

45 Telephone 02920 687241, Fax 02920 687236, e-mail foned@cf.ac.uk  
46  
47  
48  
49  
50  
51

52 **Keywords**

53 Alcohol, Social epidemiology, multilevel modelling, Public Health  
54  
55  
56  
57  
58  
59  
60

## ABSTRACT

### Objectives

The influence of neighbourhood deprivation on the risk of harmful alcohol consumption, measured by the separate categories of excess consumption and binge drinking, has not been studied. The objective of the study was to investigate the effect of neighbourhood deprivation with age, gender and socio-economic status (SES) on (1) excess alcohol consumption, and (2) binge drinking, in a representative population survey.

### Design

Cross-sectional study: multi-level analysis.

### Setting

Wales, UK, adult population ~ 2.2 million.

### Participants

58 282 respondents aged 18 years and over to four successive annual Welsh Health Surveys (2003/04-2007), nested within 32 692 households, 1839 census lower super output areas and the 22 unitary authority areas in Wales.

### Primary outcome measure

Maximal daily alcohol consumption during the past week was categorised using the UK Department of Health definition of 'none/never drinks', 'within guidelines', 'excess consumption but less than binge' and 'binge'. The data were analysed using continuation ratio ordinal multilevel models with multiple imputation for missing covariates.

## Results

Respondents in the most deprived neighbourhoods were more likely to binge drink than in the least deprived (adjusted estimates: 17.5% vs. 10.6%; difference = 6.9%, 95% CI: 6.0 to 7.8), but were less likely to report excess consumption (17.6% vs. 21.3%; difference = 3.7%, 95% CI: 2.6 to 4.8). The effect of deprivation varied significantly with age and gender, but not with SES. Younger males in deprived neighbourhoods were most likely to binge drink but the largest interaction effect of deprivation on binge drinking was found for middle-aged males living in the most deprived areas.

## Conclusion

This large-scale population study is the first to show that neighbourhood deprivation acts differentially on the risk of binge drinking between males and females at different age groups. Understanding the socio-economic patterns of harmful alcohol consumption is important for public health policy development.

## ARTICLE SUMMARY

### Article Focus

- A recent systematic review found little evidence that living in neighbourhoods of high socio-economic deprivation is associated with a higher risk of harmful alcohol consumption
- The important distinction between excess alcohol consumption and binge drinking has not previously been investigated

### Key Messages

- A higher risk of binge drinking was found in residents living in deprived neighbourhoods, particularly in young and middle-aged men
- A higher risk of excess consumption, but less than binge, was found in residents of less deprived neighbourhoods
- Neighbourhood socio-economic deprivation is an important factor to consider in public health alcohol policy development

### Strengths and Limitations

- The main strength is the large representative dataset of over 58 000 respondents, or around one in fifty of the socially diverse Welsh adult population. The ordinal alcohol consumption outcome measure was based on a widely used definition published by the UK Department of Health



- The cross-sectional analysis used the administratively defined census LSOA as a proxy for 'neighbourhood' and cannot investigate the possibility of causal relationships. Social desirability bias may result in under-reported alcohol consumption, although it is not known whether this varies between neighbourhoods.

For peer review only

## INTRODUCTION

Excess alcohol consumption causes a major global burden of disease, injury and social and economic cost.[1] Binge drinking, typically defined as consuming at least double the guideline limits in a single day during the previous week,[2] is an increasing problem which is rising particularly in young women.[3] It is associated with anti-social behaviour,[4] and around half of all violent crimes in the UK.[5] Binge drinking causes an extra burden on health services; between 20-40 % of people presenting to accident and emergency departments are intoxicated, increasing to 80% after midnight.[4] Recent data show that around 37% of men and 29% of women exceeded the current UK guidelines for safe levels of alcohol consumption of  $\leq 3$  units per day for women and  $\leq 4$  units per day for men in the past week; and 20% of men and 13% of women engaged in binge drinking, defined as  $> 6$  units per day for women and  $> 8$  units per day for men.[6] Given the wide range of harm resulting from this substantial level of consumption, the potential impact on health at the population level from a reduction in consumption is considerable.

Research investigating the socio-economic patterning of harmful alcohol consumption has generally found that lower socio-economic status (SES) groups drink more heavily and higher SES groups drink more frequently,[7] consistent with binge drinking being found to be more prevalent in the economically disadvantaged.[8] However, subtle variations in cut-points based on units have led to prevalence estimates for binge drinking in young men to differ by 22%,[2] and these summary SES relationships have been found to vary substantially with age, gender, educational level, employment status and the measure of consumption.[2,7-12]

In addition to socio-economic effects found at the individual level, it is theorised that small-area, or neighbourhood, socio-economic deprivation might exert an independent effect on

1  
2  
3 harmful alcohol consumption. However, a recent systematic review which included multilevel  
4  
5 studies of neighbourhood deprivation and alcohol consumption found little evidence to  
6  
7 support this hypothesis.[13] Of the four multilevel studies which were classified as rigorous in  
8  
9 a quality assessment, one study set in the West of Scotland, UK, found no significant  
10  
11 association between neighbourhood deprivation and drinking above guideline limits or the  
12  
13 number of units consumed in the past week.[14] A second study set in California, USA, found  
14  
15 that the odds of heavy alcohol consumption (>7 drinks/week for females and >14 for males)  
16  
17 was significantly higher for people living in the least deprived neighbourhoods with no  
18  
19 significant variation with individual SES.[15]  
20  
21  
22  
23  
24

25 The two other studies described an association between high neighbourhood deprivation and  
26  
27 high consumption.[16,17] Data from the nationally representative Third National Health and  
28  
29 Nutrition Examination Survey (NHANES III, USA) found that a composite neighbourhood  
30  
31 deprivation measure at the level of the census tract was associated with heavy alcohol use,  
32  
33 defined as consuming five or more drinks almost every day (odds ratio 1.18; 95% CI: 1.01,  
34  
35 1.38), but it was not reported whether this association varied with age, gender or SES.[16] A  
36  
37 second US study found that higher mean income and income inequality at the larger  
38  
39 community district level was significantly associated with a higher number of drinks per  
40  
41 month among drinkers.[17] Four subsequent papers reporting small studies found no  
42  
43 significant association between alcohol consumption and neighbourhood income,[18,19]  
44  
45 neighbourhood unemployment,[20] or a composite measure of relative socio-economic  
46  
47 disadvantage,[21] while a further large-scale study of over 90 000 subjects set in Canada  
48  
49 found a small effect of neighbourhood deprivation on the number of drinks consumed per  
50  
51 week in men, but not in women.[22]  
52  
53  
54  
55  
56  
57  
58  
59  
60

1  
2  
3 Possible explanations for these inconsistencies in neighbourhood associations found between  
4  
5 studies may result from different methods of defining excess, or harmful, consumption, with  
6  
7 some choosing definitions based on national guidelines for 'safe' consumption or units,[14]  
8  
9 number of drinks,[15-19,21,22] or frequency of consumption.[19,20] Additional explanations  
10  
11 for inconsistent neighbourhood associations may result from different measures of area  
12  
13 deprivation, sizes of neighbourhood, and adjustment for different individual-level risk factors  
14  
15 for excess alcohol consumption.[14-22]  
16  
17  
18  
19

20  
21 Despite the substantial public health consequences of alcohol consumption and the possible  
22  
23 importance of neighbourhood in explaining patterns of consumption, no previous study to our  
24  
25 knowledge has investigated multilevel associations with neighbourhood deprivation which  
26  
27 distinguish between excess consumption and binge drinking as distinct categories. Little is  
28  
29 known on whether any associations vary within population groups. The aim of the present  
30  
31 study was to investigate the effect of neighbourhood deprivation with age, gender and SES on  
32  
33 (1) excess alcohol consumption above guideline limits, and (2) binge drinking, in a  
34  
35 representative sample of the adult population of Wales, UK.  
36  
37  
38  
39  
40  
41  
42  
43  
44  
45  
46  
47  
48  
49  
50  
51  
52  
53  
54  
55  
56  
57  
58  
59  
60

## METHODS

### Participants

Data were drawn from four successive cross-sectional waves of the Welsh Health Survey 2003/04 to 2007, an interviewer-led household and individual survey of the adult population resident in Wales, UK.[23-25] The adult population of Wales is approximately 2.2 million (2001 Census) and the dataset available included a total of 60 555 adults aged 18 years and over. The sampling methods and the survey process are described in detail elsewhere.[24,25] Briefly, the sampling frame used was the Post Office's Postcode Address File. Private household addresses were randomly selected in a two stage design, sampling addresses within primary sampling units that were selected within the 22 unitary authority local government areas in Wales. Each adult member of the household was invited to complete a questionnaire. Response rates were high: in 2003/04 the adjusted household survey response was 74% with 85% of individuals responding within households,[24] with little change at 74% and 82% respectively in 2007.[25]

### Alcohol outcome measure

Participants were asked to state the highest number of units they had drunk on any one day in the previous seven days, using a standard prompt to convert different types and quantities of alcoholic drinks into units. The dataset provided the classification of units into ordinal categories of maximal daily consumption based on the UK Department of Health definitions (Table 1), with categories for 'none/never drinks', 'within guidelines', 'excess consumption but less than binge, and 'binge'. [26]

**Table 1** Categorisation of the alcohol consumption outcome variable

| Category                               | Maximum units drunk on any one day in the last week                                                         |
|----------------------------------------|-------------------------------------------------------------------------------------------------------------|
| None/never drinks                      | Did not drink in the last seven days                                                                        |
| Within guidelines                      | Men drinking no more than 4 units, women no more than 3 units                                               |
| Excess consumption but less than binge | Men drinking more than 4 and up to and including 8 units, women more than 3 and up to and including 6 units |
| Binge                                  | Men drinking more than 8 units, women more than 6 units                                                     |

Source: reference 26

### Neighbourhood deprivation measure

The Welsh Index of Multiple Deprivation 2005 (WIMD2005) was used as the measure of neighbourhood deprivation.[27] WIMD2005 includes seven weighted domains of deprivation: income (25%), employment (25%), education (15%), health (15%), geographical access to services (10%), housing (5%), and physical environment (5%). WIMD2005 scores are available for lower super output areas (LSOA), a unit of statistical geography defined by the 2001 UK Census.[28] There are 1896 LSOAs in Wales which have a mean population size of around 1500. Since the data included in each WIMD2005 domain are measured on different scales, each domain score is transformed to have a range of zero to 100 and the overall index is calculated using a weighted average, [27] taking a range of 1.4 to 78.9. WIMD2005 is highly correlated with the well-established Townsend index,[29] Spearman's  $r = 0.86$ ,  $n=1896$ ,  $p<0.001$ .

We used the LSOA as the closest available proxy for neighbourhood. Neighbourhood characteristics vary widely within Wales, from high to low levels of socioeconomic disadvantage, including deprived urban inner-city areas, less deprived city sub-urban

1  
2 residential areas, post-industrial valley towns, market towns and rural, farming areas.

3  
4 Respondents were linked to their neighbourhood of residence by the data owners (the Welsh  
5  
6 Government) and the dataset included individuals living in 1839 LSOAs, nested within the 22  
7  
8 unitary authorities (UA) in Wales. Each LSOA was assigned to one of five ordinal categories  
9  
10 of WIMD2005 scores with equal counts of LSOAs in each quintile.  
11  
12

### 13 14 15 16 17 18 **Measures of individual SES and potential confounding variables** 19

20 The principal measure of SES defined for the analysis was the National Statistics Socio-  
21  
22 economic Classification (NS-SEC3) variable for the head of household. This is a measure of  
23  
24 occupational social class with the following categories: professional/managerial, intermediate,  
25  
26 routine and manual occupations, and never worked/long-term unemployed. Age was analysed  
27  
28 in 10-year bands by gender. We considered other available measures of SES that were  
29  
30 associated with alcohol consumption in the dataset as confounding variables: individual  
31  
32 employment status (employed, seeking work, training/student, retired, permanently sick or  
33  
34 disabled, at home), highest educational qualification (degree, intermediate, none), ethnicity  
35  
36 (White, Black and minority ethnic) and housing tenure (owner occupier, social and private  
37  
38 renting) (table 2).  
39  
40  
41  
42  
43  
44

45 Of the 60 555 respondents, 58 282 individuals living within 32 692 households completed the  
46  
47 questions on alcohol consumption, and 50 641 had complete covariate information recorded  
48  
49 in the dataset.  
50  
51  
52  
53  
54  
55  
56  
57  
58  
59  
60

## Statistical Analysis

Since the outcome measure is an ordered categorical variable, the data were analysed using a continuation ratio model,[30] which allowed estimation of the association between neighbourhood deprivation and the likelihood of moving up one category of alcohol consumption,  $y$ , (e.g. from excess consumption but less than binge, to binge drinking). This continuation ratio approach used a linear predictor,  $\eta_k$ , to explain the probability of continuing to a higher category, conditional on reaching a certain ordinal level. The linear predictor was modelled by covariates  $x_k$  and fixed effects  $\beta$  :

$$\text{logit } p(y > k \mid y \geq k) = \eta_k = x_k \beta$$

This extends naturally to the multilevel framework, where we adopted the random effects model:

$$\text{logit } p(y > k \mid y \geq k, b) = x_k \beta + z_k b$$

where the linear predictor now has two components:  $x_k \beta$  are the fixed effects, and  $z_k b$  described the multilevel structure in the data. Again, in principle the influence of both fixed and random effects may vary according to the level  $k$ .

We estimated the regression coefficients  $\beta$  and the covariance matrix  $\text{Var}(b)$  and we derived  $p(y=k \mid b=0)$ , the predicted probabilities of membership of ordinal category  $k$  for the median geographical context  $b=0$  for each quintile of deprivation and category of SES.

The sequential modelling strategy started with the “null” four-level variance components



1  
2  
3 model, with category-specific intercepts and random effects for households, LSOAs and UAs.  
4  
5 The WIMD2005 categorical variable was fitted to estimate the unadjusted neighbourhood  
6  
7 deprivation fixed effects in model 1. To allow increased flexibility in understanding the  
8  
9 effects of deprivation on alcohol consumption, interactions between the change in alcohol  
10  
11 consumption category and deprivation quintile were included in the continuation ratio models.  
12  
13 The predicted probabilities of excess consumption and binge drinking are derived from the  
14  
15 sum of the additive main effect and interaction coefficients.  
16  
17  
18  
19

20  
21 Social class, age group, gender, the interaction between age group and gender, and the  
22  
23 potential confounders were then added to form model 2. The final model 3 was fitted with  
24  
25 cross-level interactions in separate models for WIMD2005 interacting with age group and  
26  
27 gender, and WIMD2005 with social class. Multiple imputation of five datasets using chained  
28  
29 equations in R software was used to account for missing covariates.[31,32]  
30  
31  
32  
33

34  
35 The magnitude of the variation between LSOAs and between UAs was estimated using the  
36  
37 standard deviation (SD) of their random effects, since these are measured on the same scale as  
38  
39 the fixed effects for observed covariates. The quartiles of a standard normal variable lie at +/-  
40  
41 0.67, and the differences between LSOA and between UA quartiles were computed by  
42  
43  $1.34*SD$  to compare with the magnitude of the estimated fixed effects for social class.  
44  
45  
46  
47  
48  
49  
50  
51  
52  
53  
54  
55  
56  
57  
58  
59  
60

## RESULTS

### Descriptive analysis

Overall, 22 218 (38.1%) of the total 58 282 respondents reported their levels of alcohol consumption as 'none or never drinks', 16 059 (27.6%) reported 'within guidelines', 9664 (16.6%) reported 'excess consumption but less than binge' and 10 341 (17.7%) reported 'binge' drinking. Both excess consumption and particularly binge drinking were higher in males than females. Excess consumption was highest in the 35-64 year age groups and binge drinking was highest in 18-34 year olds, declining with increasing age (table 2). The 'never worked and long-term unemployed' group and respondents with no educational qualifications showed substantially lower levels of both excess consumption and binge drinking than the three higher social class groups and those with some educational achievement. For employment status, the economically active who were employed or seeking work had higher levels of excess and binge consumption than economically inactive respondents. The proportion of respondents drinking to excess decreased with increasing neighbourhood deprivation but binge drinking showed the opposite pattern of increasing with higher deprivation (table 2).

**Table 2 Excess alcohol consumption and binge drinking by socio-economic status**

|                                   |                                         | <b>Excess<br/>consumption,<br/>less than binge</b> | <b>%</b> | <b>Binge</b> | <b>%</b> | <b>Total</b> |
|-----------------------------------|-----------------------------------------|----------------------------------------------------|----------|--------------|----------|--------------|
| Gender                            | Female                                  | 4702                                               | 15.0     | 3482         | 11.1     | 31261        |
|                                   | Male                                    | 4962                                               | 18.4     | 6859         | 25.4     | 27021        |
| Age group                         | 18-24                                   | 1001                                               | 14.5     | 2041         | 29.6     | 6888         |
|                                   | 25-34                                   | 1286                                               | 17.5     | 2105         | 28.7     | 7329         |
|                                   | 35-44                                   | 2007                                               | 19.6     | 2427         | 23.7     | 10225        |
|                                   | 45-54                                   | 2110                                               | 21.5     | 1931         | 19.7     | 9815         |
|                                   | 55-64                                   | 1961                                               | 19.2     | 1268         | 12.4     | 10216        |
|                                   | 65-74                                   | 951                                                | 12.4     | 444          | 5.8      | 7697         |
|                                   | 75-84                                   | 316                                                | 6.4      | 106          | 2.2      | 4923         |
|                                   | 85+                                     | 32                                                 | 2.7      | 19           | 1.6      | 1189         |
| Social class:                     | Professional and managerial occupations | 3850                                               | 19.5     | 3354         | 17.0     | 19699        |
|                                   | Intermediate occupations                | 1742                                               | 16.1     | 1873         | 17.3     | 10802        |
|                                   | Routine and manual occupations          | 3566                                               | 14.7     | 4397         | 18.2     | 24197        |
|                                   | Never worked and long-term unemployed   | 131                                                | 8.9      | 173          | 11.8     | 1465         |
| Employment status                 | Employed                                | 5766                                               | 20.9     | 6961         | 25.2     | 27571        |
|                                   | Seeking work                            | 138                                                | 14.9     | 274          | 29.6     | 925          |
|                                   | Training/student                        | 483                                                | 14.8     | 739          | 22.6     | 3273         |
|                                   | Permanently sick or disabled            | 599                                                | 13       | 547          | 11.8     | 4619         |
|                                   | Retired                                 | 1539                                               | 11.8     | 755          | 5.8      | 13091        |
|                                   | At home                                 | 696                                                | 13.2     | 507          | 9.6      | 5284         |
|                                   | Other                                   | 276                                                | 14.9     | 349          | 18.8     | 1856         |
| Highest educational qualification | No qualifications                       | 2140                                               | 12.6     | 2095         | 12.3     | 17026        |
|                                   | Intermediate qualifications             | 5405                                               | 18.3     | 6428         | 21.7     | 29601        |
|                                   | Degree/degree equivalent and above      | 1773                                               | 21.5     | 1445         | 17.5     | 8247         |
| Tenure                            | Owner occupier                          | 8010                                               | 17.5     | 7883         | 17.2     | 45725        |
|                                   | Social renting                          | 956                                                | 11.8     | 1340         | 16.5     | 8123         |
|                                   | Private renting / Other                 | 663                                                | 15.6     | 1085         | 25.5     | 4262         |
| Ethnicity                         | White                                   | 9492                                               | 16.8     | 10165        | 18.0     | 56438        |
|                                   | Black and minority ethnic               | 108                                                | 8.8      | 100          | 8.2      | 1222         |
| WIMD2005: Deprivation quintile    | Least deprived                          | 2304                                               | 19.5     | 1967         | 16.7     | 11786        |
|                                   | Less deprived                           | 2111                                               | 17.2     | 1927         | 15.7     | 12267        |
|                                   | Mid deprived                            | 2063                                               | 16.0     | 2219         | 17.2     | 12875        |
|                                   | More deprived                           | 1726                                               | 15.0     | 2234         | 19.4     | 11544        |
|                                   | Most deprived                           | 1460                                               | 14.9     | 1994         | 20.3     | 9810         |

## Multilevel models

The unadjusted predicted probabilities for the five neighbourhood deprivation quintiles in model 1 are shown in table 3. As with the descriptive analysis, the probability of excess consumption was higher in less deprived neighbourhoods with decreasing probability across the quintiles of deprivation. Binge drinking showed the opposite pattern of increasing probability with higher deprivation. The differences in magnitude between the model predicted probabilities and the descriptive data shown in table 2 are explained by the addition of the random effects in model 1.

After including social class, age group and gender, and the confounding variables in model 2, the adjusted difference between the deprivation quintiles for binge drinking increased, with less effect on the excess consumption category (table 3): respondents in the most deprived neighbourhoods were more likely to binge drink than in the least deprived (adjusted estimates: 17.5% vs. 10.6%; difference in proportions = 6.9%, 95% CI: 6.0 to 7.8), but were less likely to report excess consumption (17.6% vs. 21.3%; difference in proportions = 3.7%, 95% CI: 2.6 to 4.8).

Table 3 also shows the predicted probabilities of consumption for the social class categories in the fully adjusted model 2. There was little variation in excess consumption with social class. The descriptive analysis finding of a higher probability of binge drinking in the three higher social class groups compared to the never worked/long-term unemployed category remained after adjustment.

**Table 3 Model parameter estimates and predicted probabilities (%) for excess alcohol consumption and binge drinking for neighbourhood deprivation and SES**

|                                                               | Parameter estimate (SE) | Excess consumption, less than binge % | Binge % |
|---------------------------------------------------------------|-------------------------|---------------------------------------|---------|
| <b>Model 1<sup>a</sup></b>                                    |                         |                                       |         |
| <b>WIMD2005:</b>                                              |                         |                                       |         |
| Neighbourhood deprivation quintiles:                          |                         |                                       |         |
| Least deprived                                                | Reference               | 22.2                                  | 9.7     |
| Less deprived                                                 | -0.2042* (0.0372)       | 20.1                                  | 9.9     |
| Mid deprived                                                  | -0.4105* (0.0370)       | 19.1                                  | 11.2    |
| More deprived                                                 | -0.6544* (0.0375)       | 17.6                                  | 12.6    |
| Most deprived                                                 | -0.8526* (0.0391)       | 17.2                                  | 12.6    |
| Interaction: WIMD2005*change in alcohol consumption category: |                         |                                       |         |
| Within to excess: Less deprived                               | 0.2033* (0.0446)        |                                       |         |
| Excess to binge: Less deprived                                | 0.3254* (0.0565)        |                                       |         |
| Within to excess: Mid deprived                                | 0.5656* (0.0443)        |                                       |         |
| Excess to binge: Mid deprived                                 | 0.7054* (0.0554)        |                                       |         |
| Within to excess: More deprived                               | 0.9931* (0.0459)        |                                       |         |
| Excess to binge: More deprived                                | 1.1510* (0.0563)        |                                       |         |
| Within to excess: Most deprived                               | 1.3587* (0.0489)        |                                       |         |
| Excess to binge: Most deprived                                | 1.3692* (0.0584)        |                                       |         |
| <b>Model 2<sup>b</sup></b>                                    |                         |                                       |         |
| <b>WIMD2005:</b>                                              |                         |                                       |         |
| Neighbourhood deprivation quintiles:                          |                         |                                       |         |
| Least deprived                                                | Reference               | 21.3                                  | 10.6    |
| Less deprived                                                 | -0.1973* (0.0387)       | 19.5                                  | 11.1    |
| Mid deprived                                                  | -0.3879* (0.0386)       | 18.8                                  | 13.0    |
| More deprived                                                 | -0.6073* (0.0395)       | 17.5                                  | 15.3    |
| Most deprived                                                 | -0.7142* (0.0421)       | 17.6                                  | 17.5    |
| Interaction: WIMD2005*change in alcohol consumption category: |                         |                                       |         |
| Within to excess: Less deprived                               | 0.1954* (0.0470)        |                                       |         |
| Excess to binge: Less deprived                                | 0.3282* (0.0588)        |                                       |         |
| Within to excess: Mid deprived                                | 0.5720* (0.0467)        |                                       |         |
| Excess to binge: Mid deprived                                 | 0.7296* (0.0577)        |                                       |         |
| Within to excess: More deprived                               | 1.0157* (0.0483)        |                                       |         |
| Excess to binge: More deprived                                | 1.2033* (0.0586)        |                                       |         |
| Within to excess: Most deprived                               | 1.3996* (0.0514)        |                                       |         |
| Excess to binge: Most deprived                                | 1.4615* (0.0608)        |                                       |         |
| <b>NS-SEC3: SES</b>                                           |                         |                                       |         |
| Professional/managerial                                       | Reference               | 19.8                                  | 14.6    |
| Intermediate                                                  | -0.0973* (0.0265)       | 19.0                                  | 13.0    |

|                                   |                   |      |      |
|-----------------------------------|-------------------|------|------|
| Routine occupations               | -0.1519* (0.0226) | 18.6 | 12.2 |
| Never worked/long-term unemployed | -0.3339* (0.0614) | 17.1 | 9.7  |

a Model 1 included fixed effects terms for WIMD2005 deprivation quintiles and the interaction with change in category of consumption, and random effects terms for household, LSOA and unitary authority

b Model 2 added social class, age group, gender, age group\*gender, and adjusted for employment status, highest educational qualification, ethnicity, and housing tenure

\* p<0.001

1  
2  
3 The two-way cross-level interaction between WIMD2005, age group and gender showed the  
4 effect of neighbourhood deprivation on the probability of excess consumption and binge  
5 drinking varied significantly between age group and gender. The model outputs are shown on  
6 the probability scale for ease of interpretation in figures 1 and 2. Little evidence of a cross-  
7 level interaction in females or older age groups was found for either excess consumption or  
8 binge drinking. Males had a higher probability of excess consumption in low deprivation  
9 quintiles than females. Although the probability of binge drinking in females increased with  
10 increasing deprivation quintile, the gradients were significantly steeper in males. The  
11 probability of binge drinking was highest at all levels of neighbourhood deprivation in males  
12 aged 18 to 34, and the interaction effect was largest in the 35-64 year age groups. The cross-  
13 level interaction between WIMD2005 and social class was not significant suggesting that the  
14 association of excess consumption and binge drinking with neighbourhood deprivation did  
15 not vary with SES.  
16  
17  
18  
19  
20  
21  
22  
23  
24  
25  
26  
27  
28  
29  
30  
31  
32  
33

#### 34 Random effects variance

35  
36 The majority of the unexplained random variation occurred at the household level (table 4).  
37 For LSOAs, in model 2, the SD = 0.156 giving the inter-quartile range of the distribution of  
38 the LSOA variance = 0.21. This compares to a parameter estimate of -0.33 for the 'never  
39 worked' category of social class, of -0.15 for 'routine' occupations and -0.10 for the  
40 'intermediate' category, compared to the professional/managerial category (table 3). The size  
41 of this variation is of similar magnitude to the social class estimates, which suggests there is  
42 important unexplained variation that can be attributed to LSOAs. Similarly, for UAs, the  
43 inter-quartile range = 0.16, suggesting that the magnitude of the UA random variation,  
44 although smaller than LSOA, remains of importance in explaining the spatial pattern of  
45 alcohol consumption.  
46  
47  
48  
49  
50  
51  
52  
53  
54  
55  
56  
57  
58  
59  
60

**Table 4 Random effects variance in sequential multilevel models**

|                      | <b>Level</b> | <b>Variance</b> | <b>SD</b> | <b>Intra-class correlation (%)</b> |
|----------------------|--------------|-----------------|-----------|------------------------------------|
| Null model           | HH           | 0.809           | 0.899     | 74.4                               |
|                      | LSOA         | 0.032           | 0.179     | 14.8                               |
|                      | UA           | 0.017           | 0.130     | 10.8                               |
| Model 1 <sup>a</sup> | HH           | 0.824           | 0.908     | 74.8                               |
|                      | LSOA         | 0.028           | 0.167     | 13.8                               |
|                      | UA           | 0.019           | 0.139     | 11.4                               |
| Model 2 <sup>b</sup> | HH           | 0.867           | 0.931     | 77.1                               |
|                      | LSOA         | 0.024           | 0.156     | 12.9                               |
|                      | UA           | 0.015           | 0.121     | 10.0                               |
| Model 3 <sup>c</sup> | HH           | 0.866           | 0.931     | 77.3                               |
|                      | LSOA         | 0.023           | 0.153     | 12.7                               |
|                      | UA           | 0.014           | 0.120     | 10.0                               |

a Model 1 included fixed effects terms for WIMD2005 deprivation quintiles and the interaction with change in category of consumption, and random effects terms for household, LSOA and unitary authority

b Model 2 added social class, age group, gender, age group\*gender, and adjusted for employment status, highest educational qualification, ethnicity, and housing tenure

c Model 3 further included the two-way cross-level interaction between WIMD2005 deprivation quintile, age group and gender



## DISCUSSION

### Main results

The current study has investigated the difference in associations between neighbourhood deprivation and excess alcohol consumption and binge drinking as ordinal categories, based on the UK definition,[26] since it has been suggested that it is more appropriate to set benchmarks for daily than for weekly consumption of alcohol following greater concern about the health and social risks associated with single episodes of intoxication.[6] Excess consumption was more common in less deprived neighbourhoods. In contrast, binge drinking was more common in deprived neighbourhoods. These findings add to the previous US and Canadian studies which showed a significant neighbourhood effect,[16,17,22] by further assessing the complex interacting effects of neighbourhood deprivation with consumption category, age and gender, and social class. The interaction effect of neighbourhood deprivation with age and gender was greatest for binge drinking in middle-aged males with no significant interaction with social class. We also found a substantial variation between neighbourhoods, since the magnitude of the unexplained variance in alcohol consumption was similar to the effect sizes of individual SES.

### Possible mechanisms linking neighbourhood deprivation to harmful alcohol consumption

Three mechanisms have been proposed to explain how neighbourhood deprivation might exert an independent effect on the risk of harmful alcohol consumption, and a differential effect on middle-aged males.[16] First, the contagion hypothesis suggests that health behaviours are spread by social exchange and particularly social networks of personal friends. Thus, binge drinking may be more acceptable in middle-aged men resident in deprived neighbourhoods than in the non-deprived. Second, the stress of living in areas of high

1  
2  
3 neighbourhood disadvantage may make men more vulnerable to psychological distress. This  
4  
5 then increases the risk that alcohol is used as a coping mechanism.  
6  
7

8  
9  
10 Third, the structural hypothesis argues that neighbourhood social norms and institutions  
11  
12 define the pattern of health behaviours. Greater availability of cheap alcohol measured as  
13  
14 higher alcohol outlet densities might influence harmful drinking rates, although the evidence  
15  
16 summarised in systematic reviews of both cross-sectional and longitudinal studies is  
17  
18 inconsistent.[33] There is some evidence that high deprivation neighbourhoods have a higher  
19  
20 density of alcohol outlets,[15,34,35] and this might provide a mechanism to explain higher  
21  
22 consumption in deprived neighbourhoods. However, two studies which found higher outlet  
23  
24 densities in more deprived areas found that levels of consumption were highest in less  
25  
26 deprived areas.[15,34] A third study found the spatial association between outlet density and  
27  
28 deprivation did not vary systematically, suggesting the relationship between deprivation and  
29  
30 outlet density may be different in different locations.[35] This deprivation-density hypothesis  
31  
32 could not explain the findings of higher rates of excess consumption in the least deprived  
33  
34 neighbourhoods in the current study. One possibility is the acceptance of social norms of  
35  
36 regular drinking to excess, but not episodic binge drinking, in less deprived areas compared to  
37  
38 a different set of social normative binge drinking behaviour in the most deprived areas.  
39  
40  
41  
42  
43  
44

#### 45 **Strengths and limitations**

46  
47 Since 2003/04, the Welsh Health Survey has been an annual source of robust population  
48  
49 survey data. It has the important strength of a large sampling fraction resulting in a  
50  
51 representative response dataset that includes around one in fifty of the socially diverse Welsh  
52  
53 adult population, with detailed exposure data linked to the small-area neighbourhood. The  
54  
55 study findings from such a comprehensive dataset should be widely generalisable. Several  
56  
57  
58  
59  
60

1  
2  
3 limitations should be considered. The alcohol consumption outcome measure was based on a  
4  
5 widely used definition published by the UK Department of Health.[26] However, the  
6  
7 possibility of social desirability bias resulting in under-reported alcohol consumption should  
8  
9 be considered,[36,37] although it is not known whether under-reporting varies between  
10  
11 neighbourhoods. The questionnaire responses were consistent year-on-year from four  
12  
13 different successive samples, suggesting that responses were reliable. Non-response bias was  
14  
15 a possibility but the surveys had a consistently good overall response to the interviewer-led  
16  
17 method,[24,25]  
18  
19

20  
21  
22 The administratively defined census LSOA was used as a proxy for 'neighbourhood'.  
23  
24 However, the direction of bias from using non-homogeneous administrative areas is towards  
25  
26 conservative estimates.[38,39] Therefore it is unlikely that the current study over-estimated  
27  
28 the associations between alcohol consumption and neighbourhood deprivation. Finally, no  
29  
30 inferences about causal processes can be made. Reverse cause, for example, could suggest  
31  
32 that binge drinking causes a decline in social position, but this explanation seems unlikely for  
33  
34 excess alcohol consumption in which the associations were in the opposite direction to binge  
35  
36 drinking. A further limitation was that the dataset did not permit investigation of the possible  
37  
38 mechanisms for our study findings.  
39  
40  
41  
42  
43  
44

45 In conclusion, the socio-economic patterning of excess alcohol consumption and binge  
46  
47 drinking was complex. The study findings have implications for enhancing public health  
48  
49 alcohol policy development, emphasising the importance of neighbourhood. Further  
50  
51 longitudinal research on the spatial relationships between alcohol consumption, outlet density,  
52  
53 and socio-economic deprivation at individual and neighbourhood levels is necessary to further  
54  
55  
56  
57  
58  
59  
60

1  
2  
3 understand the underlying processes and provide further evidence for local and national  
4  
5 policies to reduce alcohol-related harm.[40]  
6  
7  
8  
9  
10  
11  
12  
13  
14  
15  
16  
17  
18  
19  
20  
21  
22  
23  
24  
25  
26  
27  
28  
29  
30  
31  
32  
33  
34  
35  
36  
37  
38  
39  
40  
41  
42  
43  
44  
45  
46  
47  
48  
49  
50  
51  
52  
53  
54  
55  
56  
57  
58  
59  
60

For peer review only

## COMPETING INTERESTS

None

## FUNDING

This work was supported by the Office of the Chief Social Research Officer (OCSRO), Welsh Government. [grant number 081218 SAP].

The work was undertaken at The Centre for the Development and Evaluation of Complex Interventions for Public Health Improvement, a UKCRC Public Health Research: Centre of Excellence. Funding from the British Heart Foundation, Cancer Research UK, Economic and Social Research Council (RES-590-28-0005), Medical Research Council, the Welsh Assembly Government and the Wellcome Trust (WT087640MA), under the auspices of the UK Clinical Research Collaboration, is gratefully acknowledged.

## Information Governance and data sharing

A formal data access agreement was signed with the Welsh Government in order to receive the dataset with the geographical variables for analysis. These data can only be accessed under such an agreement. There are no additional data available. Ethical approval was not required for this secondary analysis of an anonymised dataset.

**REFERENCES**

- [1] Rehm J, Mathers C, Popova S, et al. Global burden of disease and injury and economic cost attributable to alcohol use and alcohol use disorders. *Lancet* 2009;**373**:2223-33.
- [2] McAlaney J, McMahon J. Establishing rates of binge drinking in the UK : Anomalies in the data. *Alcohol Alcohol* 2006;**41**:355-57.
- [3] Smith L, Foxcroft D. *Drinking in the UK. An exploration of trends*. York: Joseph Rowntree Foundation 2009. ISBN: 978-1-85935-698-2.
- [4] Hayward R, Sharp C. *Young people, crime and anti-social behaviour: findings from the 2003 Crime and Justice Survey. Home Office Research Findings 245*. London: Home Office 2005. ISSN 1473-8406.
- [5] Richardson A, Budd T. *Home Office Research Studies 263. Alcohol, crime and disorder: a study of young adults*. London: Home Office 2003. ISBN-1-84082-961-3.
- [6] Robinson S, Harris H. *Smoking and drinking among adults, 2009. A report on the 2009 General Lifestyle Survey*. London: Office for National Statistics 2011.
- [7] Huckle T, You RQ, Casswell S. Socio-economic status predicts drinking patterns but not alcohol-related consequences independently. *Addiction* 2010;**105**:1192-202.
- [8] Kuntsche E, Rehm J, Gmel G. Characteristics of binge drinkers in Europe. *Soc Sci Med* 2004;**59**:113-27.

1  
2  
3 [9] Jefferis BJ, Manor O, Power C. Social gradients in binge drinking and abstaining: trends  
4  
5 in a cohort of British adults. *J Epidemiol Community Health* 2007;**61**:150-3.  
6  
7

8  
9 [10] Marmot M. Inequality, deprivation and alcohol use. *Addiction* 1997;**92**:S13-S20.  
10  
11

12  
13 [11] Van Oers J. Alcohol consumption, alcohol-related problems, problem drinking, and  
14  
15 socioeconomic status. *Alcohol Alcoholism* 1999;**34**:78-88.  
16  
17

18  
19 [12] Hart C, Ecob R, Smith GD. People, places and coronary heart disease risk factors: a  
20  
21 multilevel analysis of the Scottish Heart Health Study archive. *Soc Sci Med* 1997;**45**:893-902.  
22  
23

24  
25 [13] Karriker-Jaffe KJ. Areas of disadvantage: a systematic review of effects of area-level  
26  
27 socioeconomic status on substance use outcomes. *Drug Alcohol Rev* 2011;**30**:84-95.  
28  
29

30  
31 [14] Ecob R, Macintyre S. Small area variations in health related behaviours; do these depend  
32  
33 on the behaviour itself, its measurement, or on personal characteristics? *Health Place*  
34  
35 2000;**6**:261-74.  
36  
37

38  
39 [15] Pollack CE, Cubbin C, Ahn D, et al. Neighbourhood deprivation and alcohol  
40  
41 consumption: does the availability of alcohol play a role? *Int J Epidemiol* 2005;**34**:772-80.  
42  
43

44  
45 [16] Stimpson JP, Ju H, Raji MA, et al. Neighborhood deprivation and health risk behaviors  
46  
47 in NHANES III. *Am J Health Behav* 2007;**31**:215-22.  
48  
49  
50  
51  
52  
53  
54  
55  
56  
57  
58  
59  
60

1  
2  
3 [17] Galea S, Ahern J, Tracy M, et al. Neighborhood income and income distribution and the  
4 use of cigarettes, alcohol, and marijuana. *Am J Prev Med* 2007;**32**:S195-202.  
5  
6  
7

8  
9 [18] Cornaz S, Taffe P, Santos-Eggimann B. Life-course socioeconomic environment and  
10 health risk behaviours. A multilevel small-area analysis of young-old persons in an urban  
11 neighbourhood in Lausanne, Switzerland. *Health Place* 2009;**15**:273-83.  
12  
13  
14

15  
16  
17 [19] Giskes K, Turrell G, Bentley R, et al. Individual and household-level socioeconomic  
18 position is associated with harmful alcohol consumption behaviours among adults. *Aust NZ J*  
19 *Publ Heal* 2011;**35**:270-7.  
20  
21  
22  
23

24  
25  
26 [20] Dzurova D, Spilkova J, Pikhart H. Social inequalities in alcohol consumption in the  
27 Czech Republic: a multilevel analysis. *Health Place* 2010;**16**:590-7.  
28  
29  
30

31  
32  
33 [21] Adams RJ, Howard N, Tucker G, et al. Effects of area deprivation on health risks and  
34 outcomes: a multilevel cross-sectional, Australian population study. *Int J Public Health*  
35 2009;**54**:183-92.  
36  
37  
38  
39

40  
41  
42 [22] Matheson FI, White HL, Moineddin R, et al. Drinking in context: the influence of gender  
43 and neighbourhood deprivation on alcohol consumption. *J Epidemiol Community Health*  
44 2012;**66**:e4. Epub 2011 Feb 17.  
45  
46  
47  
48  
49  
50  
51  
52  
53  
54  
55  
56  
57  
58  
59  
60



1  
2  
3 [23] Doyle-Francis M, Sadler K, Kingdon A, et al. *Welsh Health Survey User Guide*. National  
4  
5 Centre for Social Research, Welsh Assembly Government 2011.

6  
7 <http://wales.gov.uk/docs/statistics/2011/110127surveyguideen.pdf> (accessed 15 January  
8  
9 2013).

10  
11  
12  
13  
14 [24] McGee A, Jotangia D, Prescott A, et al. *Welsh Health Survey - Year One Technical*  
15  
16 *Report*. National Centre for Social Research 2005.

17  
18 <http://wales.gov.uk/docs/statistics/2005/050701healthsurvey0304techen.pdf> (accessed 15  
19  
20 January 2013).

21  
22  
23  
24  
25 [25] Fuller E, Heeks F. *Welsh Health Survey 2007 Technical Report*. National Centre for  
26  
27 Social Research 2005.

28  
29 <http://wales.gov.uk/topics/statistics/publications/publication->  
30  
31 [archive/healthsurvey2007tech/?lang=en](http://wales.gov.uk/topics/statistics/publications/publication-) (accessed 15 January 2013).

32  
33  
34  
35  
36 [26] Department of Health, Home Office, Department for Education and Skills and  
37  
38 Department for Culture, Media and Sport. *Safe. Sensible. Social. The next steps in the*  
39  
40 *National Alcohol Strategy*. London: DH Publications 2007:3.

41  
42 [http://www.dh.gov.uk/prod\\_consum\\_dh/groups/dh\\_digitalassets/@dh/@en/documents/digital](http://www.dh.gov.uk/prod_consum_dh/groups/dh_digitalassets/@dh/@en/documents/digital)  
43  
44 [asset/dh\\_075219.pdf](http://www.dh.gov.uk/prod_consum_dh/groups/dh_digitalassets/@dh/@en/documents/digital) (accessed 15 January 2013).

45  
46  
47  
48  
49 [27] Welsh Assembly Government. *Welsh Index of Multiple Deprivation 2005: Technical*  
50  
51 *report*

52  
53 <http://wales.gov.uk/cisd/publications/statspubs/wimd2005technical/en.pdf?lang=en> (accessed  
54  
55 15 January 2013).

1  
2  
3 [28] Office for National Statistics (2011). *Super Output Areas (SOAs)*.

4  
5 [http://www.ons.gov.uk/ons/guide-method/geography/beginner-s-guide/census/super-output-](http://www.ons.gov.uk/ons/guide-method/geography/beginner-s-guide/census/super-output-areas--soas-/index.html)  
6  
7 [areas--soas-/index.html](http://www.ons.gov.uk/ons/guide-method/geography/beginner-s-guide/census/super-output-areas--soas-/index.html) (accessed 15 January 2013).  
8  
9

10  
11 [29] Townsend P, Phillimore P, Beattie A. *Health and deprivation: inequality and the North*.  
12  
13 London: Routledge, 1988.  
14

15  
16 [30] Agresti A. *An introduction to categorical data analysis*. 2<sup>nd</sup> ed. Hoboken, New Jersey:  
17  
18 John Wiley & Sons, Inc 2007.  
19  
20  
21

22  
23 [31] White IR, Royston P, Wood AM. Multiple imputation using chained equations: Issues  
24  
25 and guidance for practice. *Stat Med* 2010;**30**:377-99.  
26  
27  
28

29  
30 [32] van Buuren S, Groothuis-Oudshoorn K. mice: Multivariate Imputation by Chained  
31  
32 Equations in R. *Journal of Statistical Software* 2011;**45**:1-67.  
33  
34  
35

36  
37 [33] Popova S, Giesbrecht N, Bekmuradov D, et al. Hours and days of sale and density of  
38  
39 alcohol outlets: Impacts on alcohol consumption and damage: A systematic review. *Alcohol*  
40  
41 *Alcohol* 2009;**44**:500-16.  
42  
43  
44

45  
46 [34] Huckle T, Huakau J, Sweetsur P, et al. Density of alcohol outlets and teenage drinking:  
47  
48 Living in an alcogenic environment is associated with higher consumption in a metropolitan  
49  
50 setting. *Addiction* 2008;**103**:1614-21.  
51  
52  
53

1  
2  
3 [35] Ellaway A, Macdonald L, Forsyth A, et al. The socio-spatial distribution of alcohol  
4 outlets in Glasgow city. *Health Place* 2010;**16**:167-72.  
5  
6

7  
8 [36] Embree BG, Whitehead PC. Validity and reliability of self-reported drinking behavior:  
9 dealing with the problem of response bias. *J Stud Alcohol* 1993;**54**:334-44.  
10  
11

12  
13 [37] Stockwell T, Donath S, Cooper-Stanbury M, et al. Under-reporting of alcohol  
14 consumption in household surveys: a comparison of quantity-frequency, graduated-frequency  
15 and recent recall. *Addiction* 2004;**99**:1024-33.  
16  
17  
18  
19  
20

21  
22 [38] Blakely TA, Woodward AJ. Ecological effects in multi-level studies. *J Epidemiol*  
23 *Community Health* 2000;**54**:367-74.  
24  
25  
26  
27

28  
29 [39] Stafford M, Duke-Williams O, Shelton N. Small area inequalities in health: Are we  
30 underestimating them? *Soc Sci Med* 2008;**67**:891-9.  
31  
32  
33  
34

35  
36 [40] Fone DL, Dunstan FD, Webster C, et al. Change in alcohol outlet density and alcohol-  
37 related harm to population health (CHALICE). *BMC Public Health* 2012;**12**:428  
38  
39  
40  
41  
42  
43  
44  
45  
46  
47  
48  
49  
50  
51  
52  
53  
54  
55  
56  
57  
58  
59  
60

1  
2  
3 **LIST OF TITLES FOR FIGURES**  
4  
5  
6

7 Figure 1 Estimated probabilities of excess alcohol consumption by age group and gender  
8 within deprivation quintiles  
9  
10

11  
12  
13  
14 Figure 2 Estimated probabilities of binge drinking by age group and gender within  
15 deprivation quintiles  
16  
17  
18  
19  
20  
21  
22  
23  
24  
25  
26  
27  
28  
29  
30  
31  
32  
33  
34  
35  
36  
37  
38  
39  
40  
41  
42  
43  
44  
45  
46  
47  
48  
49  
50  
51  
52  
53  
54  
55  
56  
57  
58  
59  
60

1  
2  
3  
4  
5  
6  
7 **Socioeconomic patterning of excess alcohol consumption and**  
8  
9 **binge drinking: a cross-sectional study of multilevel associations**  
10  
11 **with neighbourhood deprivation**  
12  
13

14  
15  
16 David L Fone<sup>1</sup> MD

17 Daniel M Farewell<sup>1</sup> PhD

18 James White<sup>2</sup> PhD

19 Ronan A Lyons<sup>3</sup> MD

20 Frank D Dunstan<sup>1</sup> DPhil  
21  
22  
23  
24  
25  
26

27 1. Institute of Primary Care & Public Health, School of Medicine, Heath Park, Cardiff

28 University, Cardiff, CF14 4YS, UK

29 2. Centre for the Development and Evaluation of Complex Public Health Interventions,

30 School of Medicine, Cardiff University, Heath Park, Cardiff, CF14 4YS, UK

31 3. College of Medicine, Swansea University, Swansea SA2 8PP, UK  
32  
33  
34  
35  
36  
37

38 Corresponding author:

39 Professor David L Fone

40 Institute of Primary Care & Public Health, School of Medicine, 4th Floor Neuadd

41 Merionnydd, Heath Park, Cardiff University, Cardiff, CF14 4YS, UK

42 Telephone 02920 687241, Fax 02920 687236, e-mail foned@cf.ac.uk  
43  
44  
45  
46  
47  
48

49 **Keywords**

50 Alcohol, Social epidemiology, multilevel modelling, Public Health  
51  
52  
53  
54  
55  
56  
57  
58  
59  
60

## ABSTRACT

### Objectives

The influence of neighbourhood deprivation on the risk of harmful alcohol consumption, measured by the separate categories of excess consumption and binge drinking, has not been studied. The objectives of the study was to investigate the joint-effects of neighbourhood deprivation with age, gender and socio-economic status (SES) on (1) excess alcohol consumption above guideline limits, and (2) binge drinking, in a representative sample of the adult population survey of Wales, UK.

### Design

Cross-sectional study: a multi-level analysis of a population based dataset.

### Setting

Wales, UK, adult population ~ 2.24 million.

### Participants

58 282 respondents aged 18 years and over to four successive annual Welsh Health Surveys (2003/04-2007), nested within 32 692 households, 1839 census lower super output areas and the 22 unitary authority areas in Wales.

### Primary outcome measure

Maximal daily alcohol consumption during the past week was categorised using the UK Department of Health definition of 'none/never drinks', 'within guidelines', 'excess

consumption but less than binge' and 'binge'. The data were analysed using continuation ratio ordinal multilevel models with multiple imputation for missing covariates.

## Results

Respondents in the most deprived neighbourhoods were more likely to binge drink than in the least deprived (adjusted estimates: 17.5% vs. 10.6%; difference = 6.9%, 95% CI: 6.0 to 7.8), but were less likely to report excess consumption (17.6% vs. 21.3%; difference = 3.7%, 95% CI: 2.6 to 4.8). The effect of deprivation varied significantly with age and gender, but not with SES. Younger males in deprived neighbourhoods were most likely to binge drink but the largest interaction effect of deprivation on binge drinking was found for middle-aged males living in the most deprived areas.

## Conclusion

~~Neighbourhood deprivation is an important factor in the understanding of socio-economic patterns of categories of harmful alcohol consumption and for public health policy development.~~

This large-scale population study is the first to show that neighbourhood deprivation acts differentially on the risk of binge drinking between males and females at different age groups.

Understanding the socio-economic patterns of harmful alcohol consumption. This is of importan~~ee~~t for public health policy development.

Formatted: Font: (Default) Times New Roman

Formatted: Font: (Default) Times New Roman

## ARTICLE SUMMARY

### Article Focus

- A recent systematic review found little evidence that living in neighbourhoods of high socio-economic deprivation is associated with a higher risk of harmful alcohol consumption
- The important distinction between excess alcohol consumption and binge drinking has not previously been investigated

### Key Messages

- A higher risk of binge drinking was found in residents living in deprived neighbourhoods, particularly in young and middle-aged men
- A higher risk of excess consumption, but less than binge, was found in residents of less deprived neighbourhoods
- Neighbourhood socio-economic deprivation is an important factor to consider in public health alcohol policy development

### Strengths and Limitations

- The main strength is the large representative dataset of over 58 000 respondents, or around one in fifty of the socially diverse Welsh adult population. The ordinal alcohol consumption outcome measure was based on a widely used definition published by the UK Department of Health



- 1  
2  
3  
4  
5  
6  
7 • The cross-sectional analysis used the administratively defined census LSOA as a  
8 proxy for 'neighbourhood' and cannot investigate the possibility of causal  
9 relationships. Social desirability bias may result in under-reported alcohol  
10 consumption, although it is not known whether this varies between neighbourhoods.  
11  
12  
13  
14  
15  
16  
17  
18  
19  
20  
21  
22  
23  
24  
25  
26  
27  
28  
29  
30  
31  
32  
33  
34  
35  
36  
37  
38  
39  
40  
41  
42  
43  
44  
45  
46  
47  
48  
49  
50  
51  
52  
53  
54  
55  
56  
57  
58  
59  
60
- The cross-sectional analysis used the administratively defined census LSOA as a proxy for 'neighbourhood' and cannot investigate the possibility of causal relationships. Social desirability bias may result in under-reported alcohol consumption, although it is not known whether this varies between neighbourhoods.

## INTRODUCTION

Excess alcohol consumption causes a major global burden of disease, injury and social and economic cost.[1] Binge drinking, typically defined as consuming at least double the guideline limits in a single day during the previous week,[2] is an increasing problem which is rising particularly in young women.[3] It is associated with anti-social behaviour,[4] and around half of all violent crimes in the UK.[5] Binge drinking causes an extra burden on health services; between 20-40 % of people presenting to accident and emergency departments are intoxicated, increasing to 80% after midnight.[4] Recent data show that around 37% of men and 29% of women exceeded the current UK guidelines for safe levels of alcohol consumption of  $\leq 3$  units per day for women and  $\leq 4$  units per day for men in the past week; and 20% of men and 13% of women engaged in binge drinking, defined as  $> 6$  units per day for women and  $> 8$  units per day for men.[6] Given the wide range of harm resulting from this substantial level of consumption, the potential impact on health at the population level from a reduction in consumption is considerable.

Research investigating the socio-economic patterning of harmful alcohol consumption has generally found that lower socio-economic status (SES) groups drink more heavily and higher SES groups drink more frequently,[7] consistent with binge drinking being found to be more prevalent in the economically disadvantaged.[8] However, subtle variations in cut-points based on units have led to prevalence estimates for binge drinking in young men to differ by 22%, [2] and these summary SES relationships have been found to vary substantially with age, gender, educational level, employment status and the measure of consumption.[2,7-12]

In addition to socio-economic effects found at the individual level, it is theorised that small-area, or neighbourhood, socio-economic deprivation might exert an independent effect on

1  
2  
3  
4  
5  
6  
7 harmful alcohol consumption. However, a recent systematic review which included multilevel  
8 studies of neighbourhood deprivation and alcohol consumption found little evidence to  
9 support this hypothesis.[13] Of the four multilevel studies which were classified as rigorous in  
10 a quality assessment, one study set in the West of Scotland, UK, found no significant  
11 association between neighbourhood deprivation and drinking above guideline limits or the  
12 number of units consumed in the past week.[14] A second study set in California, USA, found  
13 that the odds of heavy alcohol consumption (>7 drinks/week for females and >14 for males)  
14 was significantly higher for people living in the least deprived neighbourhoods with no  
15 significant variation with individual SES.[15]  
16  
17  
18  
19  
20  
21  
22  
23  
24  
25

26 The two other studies described an association between high neighbourhood deprivation and  
27 high consumption.[16,17] Data from the nationally representative Third National Health and  
28 Nutrition Examination Survey (NHANES III, USA) found that a composite neighbourhood  
29 deprivation measure at the level of the census tract was associated with heavy alcohol use,  
30 defined as consuming five or more drinks almost every day (odds ratio 1.18; 95% CI: 1.01,  
31 1.38), but it was not reported whether this association varied with age, gender or SES.[16] A  
32 second US study found that higher mean income and income inequality at the larger  
33 community district level was significantly associated with a higher number of drinks per  
34 month among drinkers.[17] Four subsequent papers reporting small studies found no  
35 significant association between alcohol consumption and neighbourhood income,[18,19]  
36 neighbourhood unemployment,[20] or a composite measure of relative socio-economic  
37 disadvantage,[21] while a further large-scale study of over 90 000 subjects set in Canada  
38 found a small effect of neighbourhood deprivation on the number of drinks consumed per  
39 week in men, but not in women.[22]  
40  
41  
42  
43  
44  
45  
46  
47  
48  
49  
50  
51  
52  
53  
54  
55  
56  
57  
58  
59  
60

1  
2  
3  
4  
5  
6  
7 Possible explanations for these inconsistencies in neighbourhood associations found between  
8 studies may result from different methods of defining excess, or harmful, consumption, with  
9 some choosing definitions based on national guidelines for 'safe' consumption or units,[14]  
10 number of drinks,[15-19,21,22] or frequency of consumption.[19,20] Additional explanations  
11  
12 for inconsistent neighbourhood associations may result from different measures of area  
13  
14 deprivation, sizes of neighbourhood, and adjustment for different individual-level risk factors  
15  
16 for excess alcohol consumption.[14-22]  
17  
18  
19  
20

21  
22 Despite the substantial public health consequences of alcohol consumption and the possible  
23 importance of neighbourhood in explaining patterns of consumption, no previous study to our  
24 knowledge has investigated multilevel associations with neighbourhood deprivation which  
25 distinguish between excess consumption and binge drinking as distinct categories. Little is  
26 known on whether any associations vary within population groups. The aim of the present  
27  
28 study was to investigate the joint-effects of neighbourhood deprivation with age, gender and  
29  
30 SES on (1) excess alcohol consumption above guideline limits, and (2) binge drinking, in a  
31  
32 representative sample of the adult population of Wales, UK.  
33  
34  
35  
36  
37  
38  
39  
40  
41  
42  
43  
44  
45  
46  
47  
48  
49  
50  
51  
52  
53  
54  
55  
56  
57  
58  
59  
60

## METHODS

### Participants

Data were drawn from four successive cross-sectional waves of the Welsh Health Survey 2003/04 to 2007, an interviewer-led household and individual survey of the adult population resident in Wales, UK.[23,245] The adult population of Wales is approximately 3.2 million (2001 Census) and the dataset available included a total of 60 555 adults aged 18 years and over. The sampling methods and the survey process are described in detail elsewhere.[24,25] Briefly, the sampling frame used was the Post Office's Postcode Address File. Private household addresses were randomly selected in a two stage design, sampling addresses within primary sampling units that were selected within the 22 unitary authority local government areas in Wales. Each adult member of the household was invited to complete a questionnaire. Response rates were high: in 2003/04 the adjusted household survey response was 74% with 85% of individuals responding within households.[24] with little change at 74% and 82% respectively in 2007.[25]

Formatted: Font: 12 pt

Formatted: Line spacing: Double, Don't adjust space between Latin and Asian text, Don't adjust space between Asian text and numbers

### Alcohol outcome measure

Participants were asked to state the highest number of units they had drunk on any one day in the previous seven days, using a standard prompt to convert different types and quantities of alcoholic drinks into units. The dataset provided the classification of units into ordinal categories of maximal daily consumption based on the UK Department of Health definitions (Table 1), with categories for 'none/never drinks', 'within guidelines', 'excess consumption but less than binge, and 'binge'. [256]

**Table 1** Categorisation of the alcohol consumption outcome variable

| Category                               | Maximum units drunk on any <u>one</u> day in the last week                                                  |
|----------------------------------------|-------------------------------------------------------------------------------------------------------------|
| None/never drinks                      | Did not drink in the last seven days                                                                        |
| Within guidelines                      | Men drinking no more than 4 units, women no more than 3 units                                               |
| Excess consumption but less than binge | Men drinking more than 4 and up to and including 8 units, women more than 3 and up to and including 6 units |
| Binge                                  | Men drinking more than 8 units, women more than 6 units                                                     |

Source: reference 256

### Neighbourhood deprivation measure

The Welsh Index of Multiple Deprivation 2005 (WIMD2005) was used as the measure of neighbourhood deprivation.[276] WIMD2005 includes seven weighted domains of deprivation: income (25%), employment (25%), education (15%), health (15%), geographical access to services (10%), housing (5%), and physical environment (5%). WIMD2005 scores are available for lower super output areas (LSOA), a unit of statistical geography defined by the 2001 UK Census.[28] There are 1896 LSOAs in Wales which have a mean population size of around 1500. Since the data included in each WIMD2005 domain are measured on different scales, each domain score is transformed to have a range of zero to 100 and the overall index is calculated using a weighted average. [27] taking a range of 1.4 to 78.9. WIMD2005 is highly correlated with the well-established Townsend index,[29] Spearman's  $r = 0.86$ ,  $n=1896$ ,  $p<0.001$ .

We used the LSOA as the closest available proxy for neighbourhood. ~~There are 1896 LSOAs in Wales which have a mean population size of around 1500 and are constrained to a minimum of 1000. Neighbourhood characteristics vary widely within Wales, from high to low~~

**Formatted:** Don't adjust space between Latin and Asian text, Don't adjust space between Asian text and numbers

1  
2  
3  
4  
5  
6  
7  
8  
9  
10  
11  
12  
13  
14  
15  
16  
17  
18  
19  
20  
21  
22  
23  
24  
25  
26  
27  
28  
29  
30  
31  
32  
33  
34  
35  
36  
37  
38  
39  
40  
41  
42  
43  
44  
45  
46  
47  
48  
49  
50  
51  
52  
53  
54  
55  
56  
57  
58  
59  
60

levels of socioeconomic disadvantage, including deprived urban inner-city areas, less deprived city sub-urban residential areas, post-industrial valley towns, market towns and rural, farming areas. Respondents were linked to their LSOA-neighbourhood of residence by the data owners (the Welsh Government) and the dataset included individuals living in 1839 LSOAs, nested within the 22 unitary authorities (UA) local government areas (UA) in Wales. Each LSOA was assigned to one of five ordinal categories of WIMD2005 scores with equal counts of LSOAs in each quintile.

### **Measures of individual SES and potential confounding variables**

The principal measure of SES defined for the analysis was the National Statistics Socio-economic Classification (NS-SEC3) variable for the head of household. This is a measure of occupational social class with the following, defined as the person with the highest income. ~~The categories were:~~ professional/managerial, intermediate, routine and manual occupations, and never worked/long-term unemployed. Age was analysed in 10-year bands by gender. We considered other available measures of SES that were associated with alcohol consumption in the dataset as confounding variables: individual employment status (employed, seeking work, training/student, retired, permanently sick or disabled, at home), highest educational qualification (degree, intermediate, none), ~~and~~ ethnicity (White, Black and minority ethnic) and housing tenure (owner occupier, social and private renting) (table 2).

Of the 60 555 respondents, 58 282 individuals living within 32 692 households completed the questions on alcohol consumption, and 50 641 had complete covariate information recorded in the dataset.

## Statistical Analysis

Since the outcome measure is an ordered categorical variable, the data were analysed using a continuation ratio model,<sup>[2730]</sup> which allowed estimation of the association between neighbourhood deprivation and the likelihood of moving up one category of alcohol consumption,  $y$ , (e.g. from excess consumption but less than binge, to binge drinking). This continuation ratio approach used a linear predictor,  $\eta_k$ , to explain the probability of continuing to a higher category, conditional on reaching a certain ordinal level. The linear predictor was modelled by covariates  $x_k$  and fixed effects  $\beta$  :

$$\text{logit } p(y > k \mid y \geq k) = \eta_k = x_k \beta$$

This extends naturally to the multilevel framework, where we adopted the random effects model:

$$\text{logit } p(y > k \mid y \geq k, b) = x_k \beta + z_k b$$

where the linear predictor now has two components:  $x_k \beta$  are the fixed effects, and  $z_k b$  described the multilevel structure in the data. Again, in principle the influence of both fixed and random effects may vary according to the level  $k$ .

We estimated the regression coefficients  $\beta$  and the covariance matrix  $\text{Var}(b)$  and we derived  $p(y=k \mid b=0)$ , the predicted probabilities of membership of ordinal category  $k$  for the median geographical context  $b=0$  for each quintile of deprivation and category of SES.

The sequential modelling strategy started with the “null” four-level variance components



1  
2  
3  
4  
5  
6  
7 model, with category-specific intercepts and random effects for households, LSOAs and UAs.

8 The WIMD2005 categorical variable was fitted to estimate the unadjusted neighbourhood

9 deprivation fixed effects in model 1. To allow increased flexibility in understanding the  
10 effects of deprivation on alcohol consumption, interactions between the change in alcohol  
11 consumption category and deprivation ~~###~~quintile were included in the continuation ratio  
12 models. The predicted probabilities of excess consumption and binge drinking are derived  
13 from the sum of the additive main effect and interaction coefficients.

14  
15  
16  
17  
18  
19  
20  
21 Social classNS-SEC3, age group, gender, the interaction between age group and gender, and  
22 the potential confounders were then added to form model 2. The final model 3 was fitted with  
23 cross-level interactions in separate models for WIMD2005 interacting with age group and  
24 gender, and WIMD2005 with social classNS-SEC3. Multiple imputation of five datasets  
25 using chained equations in R software was used to account for missing covariates.[2831,329]

26  
27  
28  
29  
30  
31  
32  
33 The magnitude of the variation between LSOAs and between UAs was estimated using the  
34 standard deviation (SD) of their random effects, since these are measured on the same scale as  
35 the fixed effects for observed covariates. The quartiles of a standard normal variable lie at +/-  
36 0.67, and the differences between LSOA and between UA quartiles were computed by  
37 1.34\*SD to compare with the magnitude of the estimated fixed effects for social classSES.

## RESULTS

### Descriptive analysis

Overall, 22 218 (38.1%) of the total 58 282 respondents reported their levels of alcohol consumption as ‘none or never drinks’, 16 059 (27.6%) reported ‘within guidelines’, 9664 (16.6%) reported ‘excess consumption but less than binge’ and 10 341 (17.7%) reported ‘binge’ drinking. Both excess consumption and particularly binge drinking were higher in males than females. Excess consumption was highest in the 35-64 year age groups and binge drinking was highest in 18-34 year olds, declining with increasing age (table 2). The ‘never worked and long-term unemployed’ group and respondents with no educational qualifications showed substantially lower levels of both excess consumption and binge drinking than the three higher social class NS-SEC3 socio-economic groups and those with some educational achievement. For employment status, the economically active who were employed or seeking work had higher levels of excess and binge consumption than economically inactive respondents. The proportion of respondents drinking to excess decreased with increasing neighbourhood deprivation but binge drinking showed the opposite pattern of increasing with higher deprivation (table 2).

Table 2 Excess alcohol consumption and binge drinking by socio-economic status

|                                   |                                         | Excess<br>consumption,<br>less than binge | %    | Binge | %    | Total |
|-----------------------------------|-----------------------------------------|-------------------------------------------|------|-------|------|-------|
| Gender                            | Female                                  | 4702                                      | 15.0 | 3482  | 11.1 | 31261 |
|                                   | Male                                    | 4962                                      | 18.4 | 6859  | 25.4 | 27021 |
| Age group                         | 18-24                                   | 1001                                      | 14.5 | 2041  | 29.6 | 6888  |
|                                   | 25-34                                   | 1286                                      | 17.5 | 2105  | 28.7 | 7329  |
|                                   | 35-44                                   | 2007                                      | 19.6 | 2427  | 23.7 | 10225 |
|                                   | 45-54                                   | 2110                                      | 21.5 | 1931  | 19.7 | 9815  |
|                                   | 55-64                                   | 1961                                      | 19.2 | 1268  | 12.4 | 10216 |
|                                   | 65-74                                   | 951                                       | 12.4 | 444   | 5.8  | 7697  |
|                                   | 75-84                                   | 316                                       | 6.4  | 106   | 2.2  | 4923  |
|                                   | 85+                                     | 32                                        | 2.7  | 19    | 1.6  | 1189  |
| <u>Social class:</u>              |                                         |                                           |      |       |      |       |
| <u>NS-SEC3:</u>                   |                                         |                                           |      |       |      |       |
| <u>SES</u>                        |                                         |                                           |      |       |      |       |
|                                   | Professional and managerial occupations | 3850                                      | 19.5 | 3354  | 17.0 | 19699 |
|                                   | Intermediate occupations                | 1742                                      | 16.1 | 1873  | 17.3 | 24197 |
|                                   | Routine and manual occupations          | 3566                                      | 14.7 | 4397  | 18.2 | 24197 |
|                                   | Never worked and long-term unemployed   | 131                                       | 8.9  | 173   | 11.8 | 1465  |
| Employment status                 | Employed                                | 5766                                      | 20.9 | 6961  | 25.2 | 27571 |
|                                   | Seeking work                            | 138                                       | 14.9 | 274   | 29.6 | 925   |
|                                   | Training/student                        | 483                                       | 14.8 | 739   | 22.6 | 3273  |
|                                   | Permanently sick or disabled            | 599                                       | 13   | 547   | 11.8 | 4619  |
|                                   | Retired                                 | 1539                                      | 11.8 | 755   | 5.8  | 13091 |
|                                   | At home                                 | 696                                       | 13.2 | 507   | 9.6  | 5284  |
|                                   | Other                                   | 276                                       | 14.9 | 349   | 18.8 | 1856  |
| Highest educational qualification | No qualifications                       | 2140                                      | 12.6 | 2095  | 12.3 | 17026 |
|                                   | Intermediate qualifications             | 5405                                      | 18.3 | 6428  | 21.7 | 29601 |
|                                   | Degree/degree equivalent and above      | 1773                                      | 21.5 | 1445  | 17.5 | 8247  |
| Tenure                            | Owner occupier                          | 8010                                      | 17.5 | 7883  | 17.2 | 45725 |
|                                   | Social renting                          | 956                                       | 11.8 | 1340  | 16.5 | 8123  |
|                                   | Private renting / Other                 | 663                                       | 15.6 | 1085  | 25.5 | 4262  |
| Ethnicity                         | White                                   | 9492                                      | 16.8 | 10165 | 18.0 | 56438 |
|                                   | Black and minority ethnic               | 108                                       | 8.8  | 100   | 8.2  | 1222  |
| WIMD2005: Deprivation quintile    | Least deprived                          | 2304                                      | 19.5 | 1967  | 16.7 | 11786 |
|                                   | Less deprived                           | 2111                                      | 17.2 | 1927  | 15.7 | 12267 |
|                                   | Mid deprived                            | 2063                                      | 16.0 | 2219  | 17.2 | 12875 |
|                                   | More deprived                           | 1726                                      | 15.0 | 2234  | 19.4 | 11544 |
|                                   | Most deprived                           | 1460                                      | 14.9 | 1994  | 20.3 | 9810  |

Formatted Table

## Multilevel models

The unadjusted predicted probabilities for the five neighbourhood deprivation quintiles in model 1 are shown in table 3. As with the descriptive analysis, the probability of excess consumption was higher in less deprived neighbourhoods with decreasing probability across the quintiles of deprivation. Binge drinking showed the opposite pattern of increasing probability with higher deprivation. The differences in magnitude between the model predicted probabilities and the descriptive data shown in table 2 are explained by the addition of the random effects in model 1.

After including social class<sup>NS-SEC3</sup>, age group and gender, and the confounding variables in model 2, the adjusted difference between the deprivation quintiles for binge drinking increased, with less effect on the excess consumption category (table 3): respondents in the most deprived neighbourhoods were more likely to binge drink than in the least deprived (adjusted estimates: 17.5% vs. 10.6%; difference in proportions = 6.9%, 95% CI: 6.0 to 7.8), but were less likely to report excess consumption (17.6% vs. 21.3%; difference in proportions = 3.7%, 95% CI: 2.6 to 4.8).

~~In common with other ordinal models, coefficients of multilevel continuation ratio models can be challenging to interpret directly. When exponentiated, they represent conditional odds ratios for being in a higher level of alcohol consumption. The increasingly negative main effect deprivation coefficients lead to decreasing excess consumption probabilities but increasing binge drinking probabilities (table 3). This is because the coefficients of the main effects and the interaction terms are additive and so the predicted probabilities are derived from the sum of the main effect and interaction coefficients, directly. When exponentiated, they represent conditional odds ratios for being in a higher level of alcohol consumption. The~~

Formatted: Font: (Default) Times New Roman

Formatted: Font: (Default) Times New Roman

1  
2  
3  
4  
5  
6  
7  
8  
9  
10  
11  
12  
13  
14  
15  
16  
17  
18  
19  
20  
21  
22  
23  
24  
25  
26  
27  
28  
29  
30  
31  
32  
33  
34  
35  
36  
37  
38  
39  
40  
41  
42  
43  
44  
45  
46  
47  
48  
49  
50  
51  
52  
53  
54  
55  
56  
57  
58  
59  
60

~~apparent paradox of increasingly negative main effect deprivation coefficients leading to decreasing excess consumption probabilities but increasing binge probabilities (table 3) is explained by the inclusion of interaction terms between the change in alcohol consumption category and deprivation. The coefficients are additive and the predicted probabilities are derived from the sum of the main effect and interaction coefficients. Even without interactions, however, linear contrasts can result in non-linear (and non-monotonic) changes in the probabilities associated with different alcohol consumption categories. This underlines the importance of the estimated marginal probabilities in table 3 being more easily interpretable and more revealing of the complexities of the relationship between deprivation and alcohol consumption.~~

Table 3 also shows the predicted probabilities of consumption for the social class NS-SEC3 categories in the fully adjusted model 2. There was little difference-variation in excess consumption with social class SES. The descriptive analysis finding of a higher probability of binge drinking in the three higher social class SES groups compared to the never worked/long-term unemployed category remained after adjustment.

**Table 3 Model parameter estimates and predicted probabilities (%) for excess alcohol consumption and binge drinking for neighbourhood deprivation and SES**

|                                                                      | <u>Parameter estimate (SE)</u> | <u>Excess consumption, less than binge %</u> | <u>Binge %</u> |
|----------------------------------------------------------------------|--------------------------------|----------------------------------------------|----------------|
| <b>Model 1<sup>a</sup></b>                                           |                                |                                              |                |
| <b>WIMD2005:</b>                                                     |                                |                                              |                |
| <u>Neighbourhood deprivation quintiles:</u>                          |                                |                                              |                |
| <u>Least deprived</u>                                                | Reference                      | <u>22.2</u>                                  | <u>9.7</u>     |
| <u>Less deprived</u>                                                 | <u>-0.2042* (0.0372)</u>       | <u>20.1</u>                                  | <u>9.9</u>     |
| <u>Mid deprived</u>                                                  | <u>-0.4105* (0.0370)</u>       | <u>19.1</u>                                  | <u>11.2</u>    |
| <u>More deprived</u>                                                 | <u>-0.6544* (0.0375)</u>       | <u>17.6</u>                                  | <u>12.6</u>    |
| <u>Most deprived</u>                                                 | <u>-0.8526* (0.0391)</u>       | <u>17.2</u>                                  | <u>12.6</u>    |
| <u>Interaction: WIMD2005*change in alcohol consumption category:</u> |                                |                                              |                |
| <u>Within to excess: Less deprived</u>                               | <u>0.2033* (0.0446)</u>        |                                              |                |
| <u>Excess to binge: Less deprived</u>                                | <u>0.3254* (0.0565)</u>        |                                              |                |
| <u>Within to excess: Mid deprived</u>                                | <u>0.5656* (0.0443)</u>        |                                              |                |
| <u>Excess to binge: Mid deprived</u>                                 | <u>0.7054* (0.0554)</u>        |                                              |                |
| <u>Within to excess: More deprived</u>                               | <u>0.9931* (0.0459)</u>        |                                              |                |
| <u>Excess to binge: More deprived</u>                                | <u>1.1510* (0.0563)</u>        |                                              |                |
| <u>Within to excess: Most deprived</u>                               | <u>1.3587* (0.0489)</u>        |                                              |                |
| <u>Excess to binge: Most deprived</u>                                | <u>1.3692* (0.0584)</u>        |                                              |                |
| <b>Model 2<sup>b</sup></b>                                           |                                |                                              |                |
| <b>WIMD2005:</b>                                                     |                                |                                              |                |
| <u>Neighbourhood deprivation quintiles:</u>                          |                                |                                              |                |
| <u>Least deprived</u>                                                | Reference                      | <u>21.3</u>                                  | <u>10.6</u>    |
| <u>Less deprived</u>                                                 | <u>-0.1973* (0.0387)</u>       | <u>19.5</u>                                  | <u>11.1</u>    |
| <u>Mid deprived</u>                                                  | <u>-0.3879* (0.0386)</u>       | <u>18.8</u>                                  | <u>13.0</u>    |
| <u>More deprived</u>                                                 | <u>-0.6073* (0.0395)</u>       | <u>17.5</u>                                  | <u>15.3</u>    |
| <u>Most deprived</u>                                                 | <u>-0.7142* (0.0421)</u>       | <u>17.6</u>                                  | <u>17.5</u>    |
| <u>Interaction: WIMD2005*change in alcohol consumption category:</u> |                                |                                              |                |
| <u>Within to excess: Less deprived</u>                               | <u>0.1954* (0.0470)</u>        |                                              |                |
| <u>Excess to binge: Less deprived</u>                                | <u>0.3282* (0.0588)</u>        |                                              |                |
| <u>Within to excess: Mid deprived</u>                                | <u>0.5720* (0.0467)</u>        |                                              |                |
| <u>Excess to binge: Mid deprived</u>                                 | <u>0.7296* (0.0577)</u>        |                                              |                |
| <u>Within to excess: More deprived</u>                               | <u>1.0157* (0.0483)</u>        |                                              |                |
| <u>Excess to binge: More deprived</u>                                | <u>1.2033* (0.0586)</u>        |                                              |                |
| <u>Within to excess: Most deprived</u>                               | <u>1.3996* (0.0514)</u>        |                                              |                |
| <u>Excess to binge: Most deprived</u>                                | <u>1.4615* (0.0608)</u>        |                                              |                |
| <b>NS-SEC3: SES</b>                                                  |                                |                                              |                |
| <u>Professional/managerial</u>                                       | Reference                      | <u>19.8</u>                                  | <u>14.6</u>    |
| <u>Intermediate</u>                                                  | <u>-0.0973* (0.0265)</u>       | <u>19.0</u>                                  | <u>13.0</u>    |

|                                   |                   |      |      |
|-----------------------------------|-------------------|------|------|
| Routine occupations               | -0.1519* (0.0226) | 18.6 | 12.2 |
| Never worked/long-term unemployed | -0.3339* (0.0614) | 17.1 | 9.7  |

a Model 1 included fixed effects terms for WIMD2005 deprivation quintiles and the interaction with change in category of consumption, and random effects terms for household,

LSOA and unitary authority

b Model 2 added social class, age group, gender, age group\*gender, and adjusted for employment status, highest educational qualification, ethnicity, and housing tenure

\* p<0.001

**Table 3 Model parameter estimates and predicted probabilities (%) for excess alcohol consumption and binge drinking for neighbourhood deprivation and SES**

|                                            | Parameter estimate (SE) | Excess consumption, less than binge % | Binge % |
|--------------------------------------------|-------------------------|---------------------------------------|---------|
| <b>Model 1<sup>a</sup></b>                 |                         |                                       |         |
| <b>WIMD2005:</b>                           |                         |                                       |         |
| <b>Neighbourhood deprivation quintiles</b> |                         |                                       |         |
| Least deprived                             | Reference               | 22.2                                  | 9.7     |
| Less deprived                              | -0.2042* (0.0372)       | 20.1                                  | 9.9     |
| Mid-deprived                               | -0.4105* (0.0370)       | 19.1                                  | 11.2    |
| More deprived                              | -0.6544* (0.0375)       | 17.6                                  | 12.6    |
| Most deprived                              | -0.8526* (0.0391)       | 17.2                                  | 12.6    |
| <b>Model 2<sup>b</sup></b>                 |                         |                                       |         |
| <b>WIMD2005:</b>                           |                         |                                       |         |
| <b>Neighbourhood deprivation quintiles</b> |                         |                                       |         |
| Least deprived                             | Reference               | 21.3                                  | 10.6    |
| Less deprived                              | -0.1973* (0.0387)       | 19.5                                  | 11.1    |
| Mid-deprived                               | -0.3879* (0.0386)       | 18.8                                  | 13.0    |
| More deprived                              | -0.6073* (0.0395)       | 17.5                                  | 15.3    |
| Most deprived                              | -0.7142* (0.0421)       | 17.6                                  | 17.5    |
| <b>NS-SEC3: SES</b>                        |                         |                                       |         |
| Professional/managerial                    | Reference               | 19.8                                  | 14.6    |
| Intermediate                               | -0.0973* (0.0265)       | 19.0                                  | 13.0    |
| Routine occupations                        | -0.1519* (0.0226)       | 18.6                                  | 12.2    |
| Never worked/long term unemployed          | -0.3339* (0.0614)       | 17.1                                  | 9.7     |

a Model 1 included fixed effects terms for WIMD2005 deprivation quintiles and random effects terms for household, LSOA and unitary authority

1  
2  
3  
4  
5  
6  
7 | b Model 2 included NS-SEC3, age group, gender, age group\*gender, and adjusted for  
8 | employment status, highest educational qualification, ethnicity, and housing tenure  
9 | \* p<0.001  
10  
11  
12  
13  
14  
15  
16  
17  
18  
19  
20  
21  
22  
23  
24  
25  
26  
27  
28  
29  
30  
31  
32  
33  
34  
35  
36  
37  
38  
39  
40  
41  
42  
43  
44  
45  
46  
47  
48  
49  
50  
51  
52  
53  
54  
55  
56  
57  
58  
59  
60



1  
2  
3  
4  
5  
6  
7  
8  
9  
10  
11  
12  
13  
14  
15  
16  
17  
18  
19  
20  
21  
22  
23  
24  
25  
26  
27  
28  
29  
30  
31  
32  
33  
34  
35  
36  
37  
38  
39  
40  
41  
42  
43  
44  
45  
46  
47  
48  
49  
50  
51  
52  
53  
54  
55  
56  
57  
58  
59  
60

The two-way cross-level interaction between WIMD2005, age group and gender showed the effect of neighbourhood deprivation on the probability of excess consumption and binge drinking varied significantly between age group and gender. The model outputs are shown on the probability scale for ease of interpretation in figures 1 and 2. Little evidence of a cross-level interaction in females or older age groups was found for either excess consumption or binge drinking. Males had a higher probability of excess consumption in low deprivation quintiles than females. Although the probability of binge drinking in females increased with increasing deprivation quintile, the gradients were significantly steeper in males. The probability of binge drinking was highest at all levels of neighbourhood deprivation in males aged 18 to 34, and the interaction effect was largest in the 35-64 year age groups. The cross-level interaction between WIMD2005 and social class NS-SEC3 was not significant suggesting that the association of excess consumption and binge drinking with neighbourhood deprivation did not vary with SES.

#### Random effects variance

The majority of the unexplained random variation occurred at the household level (table 4).

For LSOAs, in model 2, the SD = 0.156 giving the inter-quartile range of the distribution of the LSOA variance = 0.21. This compares to a parameter estimate of -0.33 for the 'never worked' category of social class NS-SEC3, of -0.15 for 'routine' occupations and -0.10 for the 'intermediate' category, compared to the professional/managerial category (table 3). The size of this variation is of similar magnitude to the social class estimates, which suggests there is important unexplained variation that can be attributed to LSOAs. Similarly, for UAs, the inter-quartile range = 0.16, suggesting that the magnitude of the UA random variation, although smaller than LSOA, remains of importance in explaining the spatial pattern of alcohol consumption.

**Table 4 Random effects variance in sequential multilevel models**

|                      | Level | Variance | SD    | Intra-class correlation (%) |
|----------------------|-------|----------|-------|-----------------------------|
| Null model           | HH    | 0.809    | 0.899 | <u>74.4</u>                 |
|                      | LSOA  | 0.032    | 0.179 | <u>14.8</u>                 |
|                      | UA    | 0.017    | 0.130 | <u>10.8</u>                 |
| Model 1 <sup>a</sup> | HH    | 0.824    | 0.908 | <u>74.8</u>                 |
|                      | LSOA  | 0.028    | 0.167 | <u>13.8</u>                 |
|                      | UA    | 0.019    | 0.139 | <u>11.4</u>                 |
| Model 2 <sup>b</sup> | HH    | 0.867    | 0.931 | <u>77.1</u>                 |
|                      | LSOA  | 0.024    | 0.156 | <u>12.9</u>                 |
|                      | UA    | 0.015    | 0.121 | <u>10.0</u>                 |
| Model 3 <sup>c</sup> | HH    | 0.866    | 0.931 | <u>77.3</u>                 |
|                      | LSOA  | 0.023    | 0.153 | <u>12.7</u>                 |
|                      | UA    | 0.014    | 0.120 | <u>10.0</u>                 |

**Formatted Table**

**Formatted:** Font: (Default) Times New Roman, 12 pt

a Model 1 included fixed effects terms for WIMD2005 deprivation quintiles and the interaction with change in category of consumption, and random effects terms for household, LSOA and unitary authority

b Model 2 added social class, age group, gender, age group\*gender, and adjusted for employment status, highest educational qualification, ethnicity, and housing tenure

~~a Model 1 included fixed effects terms for WIMD2005 deprivation quintiles and random effects terms for household, LSOA and unitary authority~~

~~b Model 2 included NS-SEC3, age group, gender, age group\*gender, and adjusted for employment status, highest educational qualification, ethnicity, and housing tenure~~

c Model 3 further included the two-way cross-level interaction between WIMD2005 deprivation quintile, age group and gender

## DISCUSSION

### Main results

The current study has investigated the difference in associations between neighbourhood deprivation and excess alcohol consumption and binge drinking as ordinal categories, based on the UK definition,<sup>[25,26]</sup> since it has been suggested that it is more appropriate to set benchmarks for daily than for weekly consumption of alcohol following greater concern about the health and social risks associated with single episodes of intoxication.<sup>[6]</sup> Excess consumption was more common in less deprived neighbourhoods. In contrast, binge drinking was more common in deprived neighbourhoods. These findings add to the previous US and Canadian studies which showed a significant neighbourhood effect,<sup>[16,17,22]</sup> by further assessing the complex interacting effects of neighbourhood deprivation with consumption category, age and gender, and social classSES. The joint-interaction effect of neighbourhood deprivation with age and gender was greatest for binge drinking in middle-aged males with no significant interaction with social classSES. We also found a substantial geographical effect of-variation between neighbourhoods, since the magnitude of the unexplained variance in alcohol consumption was similar to the effect sizes of individual SES.

### Possible mechanisms linking neighbourhood deprivation to harmful alcohol consumption

Three mechanisms have been proposed to explain how neighbourhood deprivation might exert an independent effect on the risk of harmful alcohol consumption, and a differential effect on middle-aged males.<sup>[16]</sup> First, the contagion hypothesis suggests that health behaviours are spread by social exchange and particularly social networks of personal friends. Thus, binge drinking may be more acceptable in middle-aged men resident in deprived neighbourhoods than in the non-deprived. Second, the stress of living in areas of high

1  
2  
3  
4  
5  
6  
7  
8  
9  
10  
11  
12  
13  
14  
15  
16  
17  
18  
19  
20  
21  
22  
23  
24  
25  
26  
27  
28  
29  
30  
31  
32  
33  
34  
35  
36  
37  
38  
39  
40  
41  
42  
43  
44  
45  
46  
47  
48  
49  
50  
51  
52  
53  
54  
55  
56  
57  
58  
59  
60

neighbourhood disadvantage may make men more vulnerable to psychological distress. This then increases the risk that alcohol is used as a coping mechanism.

Third, the structural hypothesis argues that neighbourhood social norms and institutions define the pattern of health behaviours. Greater availability of cheap alcohol measured as higher alcohol outlet densities might influence harmful drinking rates, although the evidence summarised in systematic reviews of both cross-sectional and longitudinal studies is inconsistent.<sup>[303]</sup> There is some evidence that high deprivation neighbourhoods have a higher density of alcohol outlets,<sup>[15,314,325]</sup> and this might provide a mechanism to explain higher consumption in deprived neighbourhoods. However, two studies which found higher outlet densities in more deprived areas found that levels of consumption were highest in less deprived areas.<sup>[15,314]</sup> A third study found the spatial association between outlet density and deprivation did not vary systematically, suggesting the relationship between deprivation and outlet density may be different in different locations.<sup>[325]</sup> This deprivation-density hypothesis could not explain the findings of higher rates of excess consumption in the least deprived neighbourhoods in the current study. One possibility is the acceptance of social norms of regular drinking to excess, but not episodic binge drinking, in less deprived areas compared to a different set of social normative binge drinking behaviour in the most deprived areas.

### Strengths and limitations

Since 2003/04, the Welsh Health Survey has been an annual source of robust population survey data. It has the important strength of a large sampling fraction resulting in a representative response dataset that includes around one in fifty of the socially diverse Welsh adult population, with detailed exposure data linked to the small-area neighbourhood. The

1  
2  
3  
4  
5  
6  
7  
8  
9  
10  
11  
12  
13  
14  
15  
16  
17  
18  
19  
20  
21  
22  
23  
24  
25  
26  
27  
28  
29  
30  
31  
32  
33  
34  
35  
36  
37  
38  
39  
40  
41  
42  
43  
44  
45  
46  
47  
48  
49  
50  
51  
52  
53  
54  
55  
56  
57  
58  
59  
60

study findings from such a comprehensive dataset should be ~~more~~-widely generalisable.

Several limitations should be considered. The alcohol consumption outcome measure was

based on a widely used definition published by the UK Department of Health.[265] However,

the possibility of social desirability bias resulting in under-reported alcohol consumption

should be considered,[336,347] although it is not known whether under-reporting varies

between neighbourhoods. The questionnaire responses were consistent year-on-year from four

different successive samples, suggesting that responses were reliable. Non-response bias was

a possibility but the surveys had a consistently good overall response to the interviewer-led

method,[24,25]Non response bias was a possibility but the surveys had a consistently good

overall response to the interviewer led method, from 74% of sampled households and 85% of

individuals within responding households in 2003/04,[24] to 74% and 82% respectively in

2010.[535]

The administratively defined census LSOA was used as a proxy for 'neighbourhood'.

However, the direction of bias from using non-homogeneous administrative areas is towards

conservative estimates.[368,379] Therefore it is unlikely that the current study over-estimated

the associations between alcohol consumption and neighbourhood deprivation. Finally, no

inferences about causal processes can be made. Reverse cause, for example, could suggest

that binge drinking causes a decline in social position, but this explanation seems unlikely for

excess alcohol consumption in which the associations were in the opposite direction to binge

drinking. A further limitation was that the dataset did not permit investigation of the possible

mechanisms for our study findings.

In conclusion, the socio-economic patterning of excess alcohol consumption and binge

drinking was complex. The study findings have implications for enhancing public health

1  
2  
3  
4  
5  
6  
7 alcohol policy development, emphasising the importance of neighbourhood. Further  
8  
9 longitudinal research on the spatial relationships between alcohol consumption, outlet density,  
10  
11 and socio-economic deprivation at individual and neighbourhood levels is necessary to further  
12  
13 understand the underlying processes and provide further evidence for local and national  
14  
15 policies to reduce alcohol-related harm.<sup>[4038]</sup>  
16  
17  
18  
19  
20  
21  
22  
23  
24  
25  
26  
27  
28  
29  
30  
31  
32  
33  
34  
35  
36  
37  
38  
39  
40  
41  
42  
43  
44  
45  
46  
47  
48  
49  
50  
51  
52  
53  
54  
55  
56  
57  
58  
59  
60

1  
2  
3  
4  
5  
6  
7 **COMPETING INTERESTS**  
8  
9

10  
11 None  
12  
13

14  
15 **FUNDING**  
16

17  
18 This work was supported by the Office of the Chief Social Research Officer (OCSRO), Welsh  
19 Government. [grant number 081218 SAP].  
20  
21  
22  
23

24 The work was undertaken at The Centre for the Development and Evaluation of Complex  
25 Interventions for Public Health Improvement, a UKCRC Public Health Research: Centre of  
26 Excellence. Funding from the British Heart Foundation, Cancer Research UK, Economic and  
27 Social Research Council (RES-590-28-0005), Medical Research Council, the Welsh  
28 Assembly Government and the Wellcome Trust (WT087640MA), under the auspices of the  
29 UK Clinical Research Collaboration, is gratefully acknowledged.  
30  
31  
32  
33  
34  
35  
36  
37  
38  
39

40 **Information Governance and data sharing**  
41

42 A formal data access agreement was signed with the Welsh Government in order to receive  
43 the dataset with the geographical variables for analysis. These data can only be accessed  
44 under such an agreement. There are no additional data available. Ethical approval was not  
45 required for this secondary analysis of an anonymised dataset.  
46  
47  
48  
49  
50  
51  
52  
53  
54  
55  
56  
57  
58  
59  
60

## REFERENCES

- [1] Rehm J, Mathers C, Popova S, et al. Global burden of disease and injury and economic cost attributable to alcohol use and alcohol use disorders. *Lancet* 2009;**373**:2223-33.
- [2] McAlaney J, McMahon J. Establishing rates of binge drinking in the UK : Anomalies in the data. *Alcohol Alcohol* 2006;**41**:355-57.
- [3] Smith L, Foxcroft D. *Drinking in the UK. An exploration of trends*. York: Joseph Rowntree Foundation 2009. ISBN: 978-1-85935-698-2.
- [4] Hayward R, Sharp C. *Young people, crime and anti-social behaviour: findings from the 2003 Crime and Justice Survey. Home Office Research Findings 245*. London: Home Office 2005. ISSN 1473-8406.
- [5] Richardson A, Budd T. *Home Office Research Studies 263. Alcohol, crime and disorder: a study of young adults*. London: Home Office 2003. ISBN-1-84082-961-3.
- [6] Robinson S, Harris H. *Smoking and drinking among adults, 2009. A report on the 2009 General Lifestyle Survey*. London: Office for National Statistics 2011.
- [7] Huckle T, You RQ, Casswell S. Socio-economic status predicts drinking patterns but not alcohol-related consequences independently. *Addiction* 2010;**105**:1192-202.
- [8] Kuntsche E, Rehm J, Gmel G. Characteristics of binge drinkers in Europe. *Soc Sci Med* 2004;**59**:113-27.



1  
2  
3  
4  
5  
6  
7  
8  
9  
10  
11  
12  
13  
14  
15  
16  
17  
18  
19  
20  
21  
22  
23  
24  
25  
26  
27  
28  
29  
30  
31  
32  
33  
34  
35  
36  
37  
38  
39  
40  
41  
42  
43  
44  
45  
46  
47  
48  
49  
50  
51  
52  
53  
54  
55  
56  
57  
58  
59  
60

[9] Jefferis BJ, Manor O, Power C. Social gradients in binge drinking and abstaining: trends in a cohort of British adults. *J Epidemiol Community Health* 2007;**61**:150-3.

[10] Marmot M. Inequality, deprivation and alcohol use. *Addiction* 1997;**92**:S13-S20.

[11] Van Oers J. Alcohol consumption, alcohol-related problems, problem drinking, and socioeconomic status. *Alcohol Alcoholism* 1999;**34**:78-88.

[12] Hart C, Ecob R, Smith GD. People, places and coronary heart disease risk factors: a multilevel analysis of the Scottish Heart Health Study archive. *Soc Sci Med* 1997;**45**:893-902.

[13] Karriker-Jaffe KJ. Areas of disadvantage: a systematic review of effects of area-level socioeconomic status on substance use outcomes. *Drug Alcohol Rev* 2011;**30**:84-95.

[14] Ecob R, Macintyre S. Small area variations in health related behaviours; do these depend on the behaviour itself, its measurement, or on personal characteristics? *Health Place* 2000;**6**:261-74.

[15] Pollack CE, Cubbin C, Ahn D, et al. Neighbourhood deprivation and alcohol consumption: does the availability of alcohol play a role? *Int J Epidemiol* 2005;**34**:772-80.

Formatted: English (U.K.)

[16] Stimpson JP, Ju H, Raji MA, et al. Neighborhood deprivation and health risk behaviors in NHANES III. *Am J Health Behav* 2007;**31**:215-22.

Field Code Changed

1  
2  
3  
4  
5  
6  
7 [17] Galea S, Ahern J, Tracy M, et al. Neighborhood income and income distribution and the  
8 use of cigarettes, alcohol, and marijuana. *Am J Prev Med* 2007;**32**:S195-202.  
9

10  
11  
12 [18] Cornaz S, Taffé P, Santos-Eggimann B. Life-course socioeconomic environment and  
13 health risk behaviours. A multilevel small-area analysis of young-old persons in an urban  
14 neighbourhood in Lausanne, Switzerland. *Health Place* 2009;**15**:273-83.  
15  
16  
17

18  
19  
20 [19] Giskes K, Turrell G, Bentley R, et al. Individual and household-level socioeconomic  
21 position is associated with harmful alcohol consumption behaviours among adults. *Aust NZ J*  
22 *Publ Heal* 2011;**35**:270-7.  
23  
24  
25

26  
27  
28 [20] Dzurova D, Spilkova J, Pikhart H. Social inequalities in alcohol consumption in the  
29 Czech Republic: a multilevel analysis. *Health Place* 2010;**16**:590-7.  
30  
31

32  
33  
34 [21] Adams RJ, Howard N, Tucker G, et al. Effects of area deprivation on health risks and  
35 outcomes: a multilevel cross-sectional, Australian population study. *Int J Public Health*  
36 2009;**54**:183-92.  
37  
38  
39

40  
41 [22] Matheson FI, White HL, Moineddin R, et al. Drinking in context: the influence of gender  
42 and neighbourhood deprivation on alcohol consumption. *J Epidemiol Community Health*  
43 2012;**66**:e4. Epub 2011 Feb 17.  
44  
45  
46  
47  
48  
49  
50  
51  
52  
53  
54  
55  
56  
57  
58  
59  
60

Formatted: English (U.K.)

Field Code Changed

1  
2  
3  
4  
5  
6  
7 [23] Doyle-Francis M, Sadler K, Kingdon A, et al. *Welsh Health Survey User Guide*. National  
8 Centre for Social Research, Welsh Assembly Government 2011.

9  
10 <http://wales.gov.uk/docs/statistics/2011/110127surveyguideen.pdf> (accessed 15 January  
11 [2013](#)~~accessed 22 October 2012~~).

12  
13  
14  
15  
16 [24] McGee A, Jotangia D, Prescott A, et al. *Welsh Health Survey - Year One Technical*  
17 *Report*. National Centre for Social Research 2005.

18  
19  
20 <http://wales.gov.uk/docs/statistics/2005/050701healthsurvey0304techen.pdf> (accessed 15  
21 [January 2013](#)~~22 October 2012~~).

22  
23  
24  
25  
26 [25] Fuller E, Heeks F. *Welsh Health Survey 2007 Technical Report*. National Centre for  
27 Social Research 2005.

28  
29 [http://wales.gov.uk/topics/statistics/publications/publication-  
31 archive/healthsurvey2007tech/?lang=en](http://wales.gov.uk/topics/statistics/publications/publication-<br/>30 archive/healthsurvey2007tech/?lang=en) (accessed 15 January 2013).

32  
33  
34  
35 [26] Department of Health, Home Office, Department for Education and Skills and  
36 Department for Culture, Media and Sport. *Safe. Sensible. Social. The next steps in the*  
37 *National Alcohol Strategy*. London: DH Publications 2007:3.

38  
39  
40 [http://www.dh.gov.uk/prod\\_consum\\_dh/groups/dh\\_digitalassets/@dh/@en/documents/digital  
42 asset/dh\\_075219.pdf](http://www.dh.gov.uk/prod_consum_dh/groups/dh_digitalassets/@dh/@en/documents/digital<br/>41 asset/dh_075219.pdf) (accessed 15 January 2013~~accessed 22 October 2012~~).

43  
44  
45  
46 [27] Welsh Assembly Government. *Welsh Index of Multiple Deprivation 2005: Technical*  
47 *report*

48  
49  
50 <http://wales.gov.uk/cisd/publications/statspubs/wimd2005technical/en.pdf?lang=en> (accessed  
51 [22-15 October](#)~~January 2012~~).

1  
2  
3  
4  
5  
6  
7  
8  
9  
10 [28] Office for National Statistics (2011). *Super Output Areas (SOAs)*.

11 [http://www.ons.gov.uk/ons/guide-method/geography/beginner-s-guide/census/super-output-](http://www.ons.gov.uk/ons/guide-method/geography/beginner-s-guide/census/super-output-areas--soas-/index.html)  
12 [areas--soas-/index.html](http://www.ons.gov.uk/ons/guide-method/geography/beginner-s-guide/census/super-output-areas--soas-/index.html) (accessed 15 January 2013).

Formatted: Font: Italic

Formatted: Font: 12 pt

13  
14  
15  
16  
17  
18 [239] Townsend P, Phillimore P, Beattie A. *Health and deprivation: inequality and the North*.  
19 *London: Routledge, 1988.*

20  
21  
22  
23  
24  
25  
26 [2730] Agresti A. *An introduction to categorical data analysis*. 2<sup>nd</sup> ed. Hoboken, New Jersey:  
27 John Wiley & Sons, Inc 2007.

28  
29  
30  
31 [2831] White IR, Royston P, Wood AM. Multiple imputation using chained equations: Issues  
32 and guidance for practice. *Stat Med* 2010;**30**:377-99.

33  
34  
35  
36 [2932] van Buuren S, Groothuis-Oudshoorn K. mice: Multivariate Imputation by Chained  
37 Equations in R. *Journal of Statistical Software* 2011;**45**:1-67.

38  
39  
40  
41 [339] Popova S, Giesbrecht N, Bekmuradov D, et al. Hours and days of sale and density of  
42 alcohol outlets: Impacts on alcohol consumption and damage: A systematic review. *Alcohol*  
43 *Alcohol* 2009;**44**:500-16.

[344] Huckle T, Huakau J, Sweetsur P, et al. Density of alcohol outlets and teenage drinking: Living in an alcogenic environment is associated with higher consumption in a metropolitan setting. *Addiction* 2008;**103**:1614-21.

[325] Ellaway A, Macdonald L, Forsyth A, et al. The socio-spatial distribution of alcohol outlets in Glasgow city. *Health Place* 2010;**16**:167-72.

[336] Embree BG, Whitehead PC. Validity and reliability of self-reported drinking behavior: dealing with the problem of response bias. *J Stud Alcohol* 1993;**54**:334-44.

[347] Stockwell T, Donath S, Cooper-Stanbury M, et al.

Under-reporting of alcohol consumption in household surveys: a comparison of quantity-frequency, graduated-frequency and recent recall. *Addiction* 2004;**99**:1024-33.

[35] Fuller E, Heeks F. *Welsh Health Survey 2007 Technical Report*. National Centre for Social Research 2005.

<http://wales.gov.uk/topics/statistics/publications/publication-archive/healthsurvey2007tech/?lang=en> (accessed 22 October 2012).

[368] Blakely TA, Woodward AJ. Ecological effects in multi-level studies. *J Epidemiol Community Health* 2000;**54**:367-74.

[379] Stafford M, Duke-Williams O, Shelton N. Small area inequalities in health: Are we underestimating them? *Soc Sci Med* 2008;**67**:891-9.

Formatted

Formatted: Normal, Line spacing: single

Formatted: Normal

Field Code Changed

Formatted: Font: Bold

1  
2  
3  
4  
5  
6  
7 [4038] Fone DL, Dunstan FD, Webster C, et al. Change in alcohol outlet density and alcohol-  
8 related harm to population health (CHALICE). *BMC Public Health* 2012;**12**:428  
9  
10  
11  
12  
13  
14  
15  
16  
17  
18  
19  
20  
21  
22  
23  
24  
25  
26  
27  
28  
29  
30  
31  
32  
33  
34  
35  
36  
37  
38  
39  
40  
41  
42  
43  
44  
45  
46  
47  
48  
49  
50  
51  
52  
53  
54  
55  
56  
57  
58  
59  
60

For peer review only

1  
2  
3  
4  
5  
6  
7  
8  
9  
10  
11  
12  
13  
14  
15  
16  
17  
18  
19  
20  
21  
22  
23  
24  
25  
26  
27  
28  
29  
30  
31  
32  
33  
34  
35  
36  
37  
38  
39  
40  
41  
42  
43  
44  
45  
46  
47  
48  
49  
50  
51  
52  
53  
54  
55  
56  
57  
58  
59  
60

**LIST OF TITLES FOR FIGURES**

Figure 1 Estimated probabilities of excess alcohol consumption by age group and gender within deprivation quintiles

Figure 2 Estimated probabilities of binge drinking by age group and gender within deprivation quintiles

For peer review only

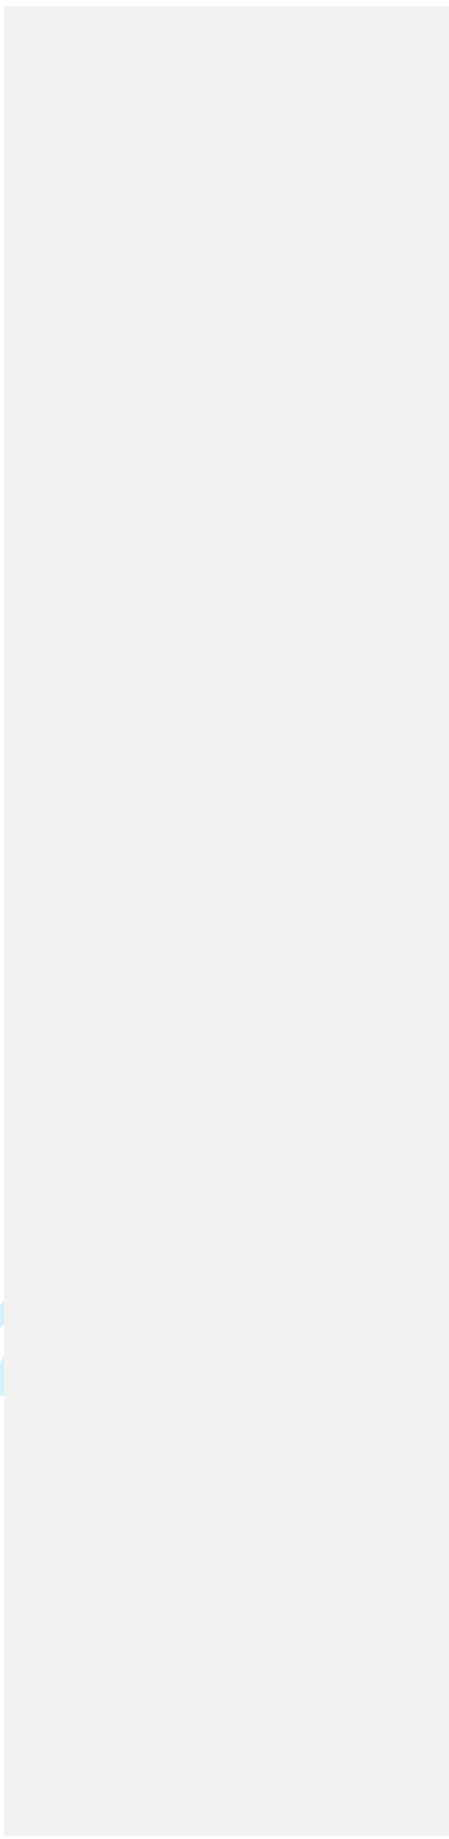

21  
22  
23  
24  
25  
26  
27

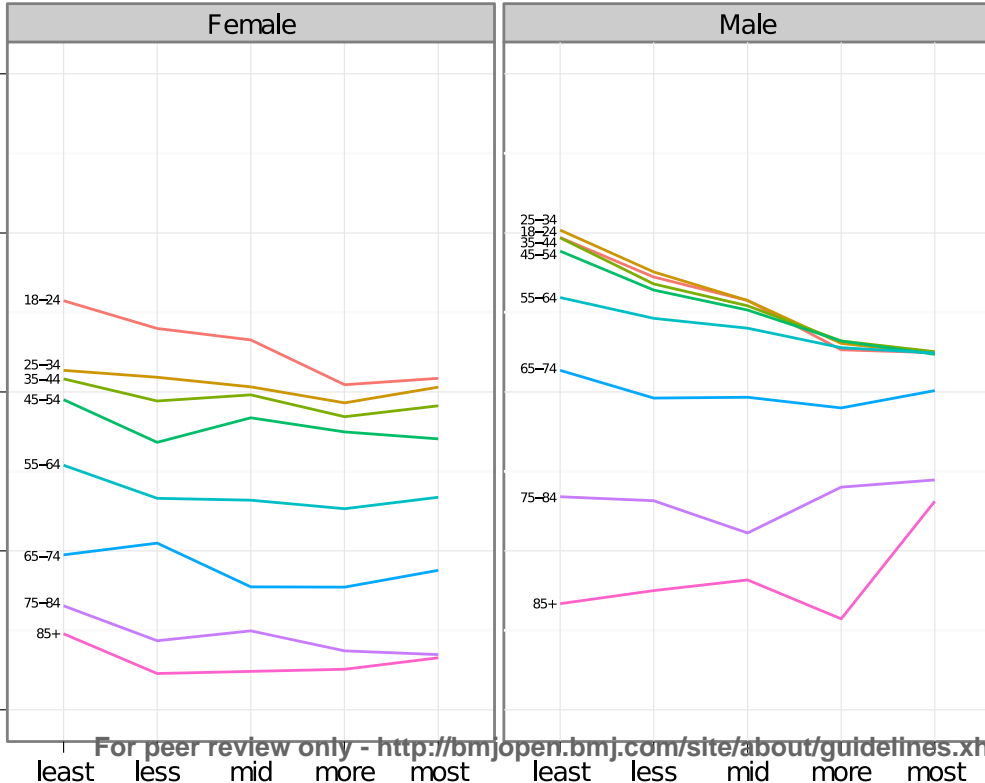

For peer review only - <http://bmjopen.bmj.com/site/about/guidelines.xhtml>

WIMD2005



1  
2  
3  
4  
5  
6  
7  
8  
9  
10  
11  
12  
13  
14  
15  
16  
17  
18  
19  
20  
21  
22  
23  
24  
25  
26  
27

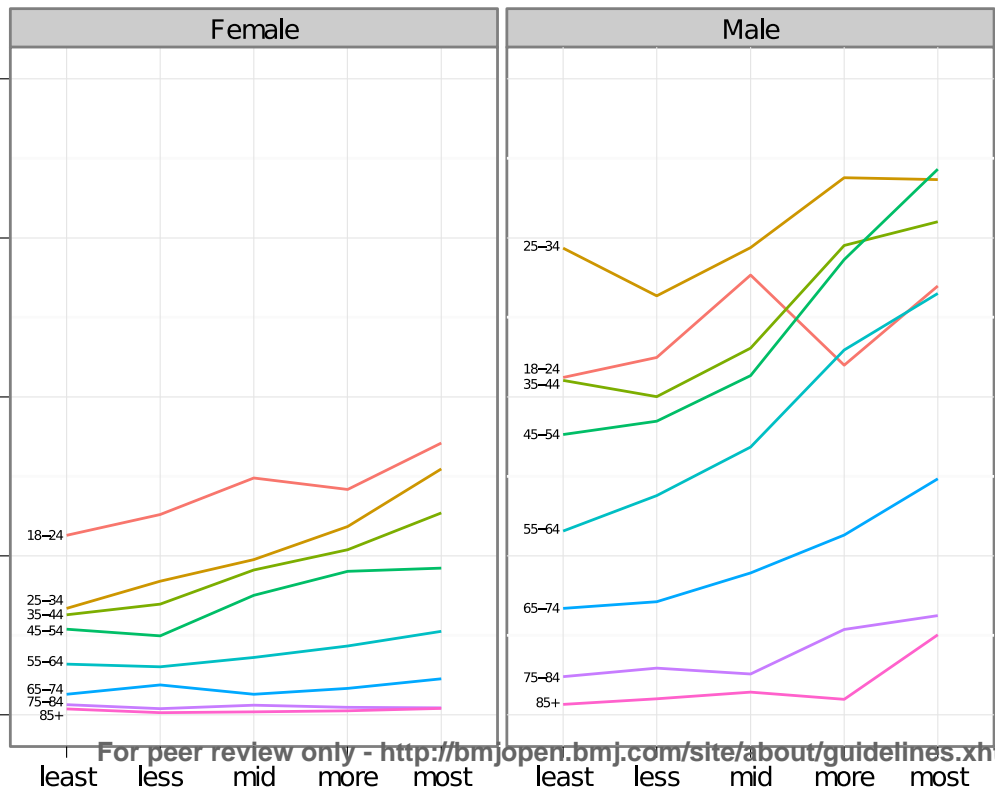

For peer review only - <http://bmjopen.bmj.com/site/about/guidelines.xhtml>

WIND2005

STROBE Statement—Checklist of items that should be included in reports of *cross-sectional studies*

|                              | DONE?            | Item No | Recommendation                                                                                                                                                                                    |
|------------------------------|------------------|---------|---------------------------------------------------------------------------------------------------------------------------------------------------------------------------------------------------|
| Title and abstract           | √                | 1       | (a) Indicate the study's design with a commonly used term in the title or the abstract                                                                                                            |
|                              | √                |         | (b) Provide in the abstract an informative and balanced summary of what was done and what was found                                                                                               |
| <b>Introduction</b>          |                  |         |                                                                                                                                                                                                   |
| Background/rationale         | √                | 2       | Explain the scientific background and rationale for the investigation being reported                                                                                                              |
| Objectives                   | √                | 3       | State specific objectives, including any prespecified hypotheses                                                                                                                                  |
| <b>Methods</b>               |                  |         |                                                                                                                                                                                                   |
| Study design                 | √                | 4       | Present key elements of study design early in the paper                                                                                                                                           |
| Setting                      | √                | 5       | Describe the setting, locations, and relevant dates, including periods of recruitment, exposure, follow-up, and data collection                                                                   |
| Participants                 | √                | 6       | (a) Give the eligibility criteria, and the sources and methods of selection of participants                                                                                                       |
| Variables                    | √                | 7       | Clearly define all outcomes, exposures, predictors, potential confounders, and effect modifiers. Give diagnostic criteria, if applicable                                                          |
| Data sources/<br>measurement | √                | 8*      | For each variable of interest, give sources of data and details of methods of assessment (measurement). Describe comparability of assessment methods if there is more than one group              |
| Bias                         | √                | 9       | Describe any efforts to address potential sources of bias                                                                                                                                         |
| Study size                   | √                | 10      | Explain how the study size was arrived at                                                                                                                                                         |
| Quantitative variables       | √                | 11      | Explain how quantitative variables were handled in the analyses. If applicable, describe which groupings were chosen and why                                                                      |
| Statistical methods          | √                | 12      | (a) Describe all statistical methods, including those used to control for confounding                                                                                                             |
|                              | √                |         | (b) Describe any methods used to examine subgroups and interactions                                                                                                                               |
|                              | √                |         | (c) Explain how missing data were addressed                                                                                                                                                       |
|                              | √                |         | (d) If applicable, describe analytical methods taking account of sampling strategy                                                                                                                |
|                              | √                |         | (e) Describe any sensitivity analyses                                                                                                                                                             |
| <b>Results</b>               |                  |         |                                                                                                                                                                                                   |
| Participants                 | √                | 13*     | (a) Report numbers of individuals at each stage of study—eg numbers potentially eligible, examined for eligibility, confirmed eligible, included in the study, completing follow-up, and analysed |
|                              | N/known          |         | (b) Give reasons for non-participation at each stage                                                                                                                                              |
|                              | Would add little |         | (c) Consider use of a flow diagram                                                                                                                                                                |
| Descriptive data             | √                | 14*     | (a) Give characteristics of study participants (eg demographic,                                                                                                                                   |

|                          |                                                  |     |                                                                                                                                                                                                              |
|--------------------------|--------------------------------------------------|-----|--------------------------------------------------------------------------------------------------------------------------------------------------------------------------------------------------------------|
|                          |                                                  |     | clinical, social) and information on exposures and potential confounders                                                                                                                                     |
|                          | √                                                |     | (b) Indicate number of participants with missing data for each variable of interest                                                                                                                          |
| Outcome data             | √                                                | 15* | Report numbers of outcome events or summary measures                                                                                                                                                         |
| Main results             | √                                                | 16  | (a) Give unadjusted estimates and, if applicable, confounder-adjusted estimates and their precision (eg, 95% confidence interval). Make clear which confounders were adjusted for and why they were included |
|                          | √ (equal count method for small-area boundaries) |     | (b) Report category boundaries when continuous variables were categorized                                                                                                                                    |
|                          | N/A                                              |     | (c) If relevant, consider translating estimates of relative risk into absolute risk for a meaningful time period                                                                                             |
| Other analyses           | √                                                | 17  | Report other analyses done—eg analyses of subgroups and interactions, and sensitivity analyses                                                                                                               |
| <b>Discussion</b>        |                                                  |     |                                                                                                                                                                                                              |
| Key results              | √                                                | 18  | Summarise key results with reference to study objectives                                                                                                                                                     |
| Limitations              | √                                                | 19  | Discuss limitations of the study, taking into account sources of potential bias or imprecision. Discuss both direction and magnitude of any potential bias                                                   |
| Interpretation           | √                                                | 20  | Give a cautious overall interpretation of results considering objectives, limitations, multiplicity of analyses, results from similar studies, and other relevant evidence                                   |
| Generalisability         | √                                                | 21  | Discuss the generalisability (external validity) of the study results                                                                                                                                        |
| <b>Other information</b> |                                                  |     |                                                                                                                                                                                                              |
| Funding                  | √                                                | 22  | Give the source of funding and the role of the funders for the present study and, if applicable, for the original study on which the present article is based                                                |

\*Give information separately for exposed and unexposed groups.

**Note:** An Explanation and Elaboration article discusses each checklist item and gives methodological background and published examples of transparent reporting. The STROBE checklist is best used in conjunction with this article (freely available on the Web sites of PLoS Medicine at <http://www.plosmedicine.org/>, Annals of Internal Medicine at <http://www.annals.org/>, and Epidemiology at <http://www.epidem.com/>). Information on the STROBE Initiative is available at [www.strobe-statement.org](http://www.strobe-statement.org).

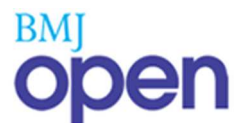

**Socioeconomic patterning of excess alcohol consumption and binge drinking: a cross-sectional study of multilevel associations with neighbourhood deprivation**

|                                 |                                                                                                                                                                                                                                                                                                                                                                                                                                               |
|---------------------------------|-----------------------------------------------------------------------------------------------------------------------------------------------------------------------------------------------------------------------------------------------------------------------------------------------------------------------------------------------------------------------------------------------------------------------------------------------|
| Journal:                        | <i>BMJ Open</i>                                                                                                                                                                                                                                                                                                                                                                                                                               |
| Manuscript ID:                  | bmjopen-2012-002337.R2                                                                                                                                                                                                                                                                                                                                                                                                                        |
| Article Type:                   | Research                                                                                                                                                                                                                                                                                                                                                                                                                                      |
| Date Submitted by the Author:   | 08-Mar-2013                                                                                                                                                                                                                                                                                                                                                                                                                                   |
| Complete List of Authors:       | Fone, David; Cardiff University, Institute of Primary Care & Public Health<br>Farewell, Daniel; Cardiff University, Institute of Primary Care & Public Health<br>White, James; Cardiff University, Centre for the Development and Evaluation of Complex Interventions for Public Health Improvement<br>Lyons, Ronan; Swansea University, College of Medicine<br>Dunstan, Frank; Cardiff University, Institute of Primary Care & Public Health |
| <b>Primary Subject Heading</b>: | Epidemiology                                                                                                                                                                                                                                                                                                                                                                                                                                  |
| Secondary Subject Heading:      | Public health, Addiction, Sociology                                                                                                                                                                                                                                                                                                                                                                                                           |
| Keywords:                       | EPIDEMIOLOGY, PUBLIC HEALTH, PREVENTIVE MEDICINE                                                                                                                                                                                                                                                                                                                                                                                              |
|                                 |                                                                                                                                                                                                                                                                                                                                                                                                                                               |

SCHOLARONE™  
Manuscripts

only

1  
2  
3 **Socioeconomic patterning of excess alcohol consumption and**  
4  
5  
6 **binge drinking: a cross-sectional study of multilevel associations**  
7  
8  
9 **with neighbourhood deprivation**  
10

11  
12  
13 David L Fone<sup>1</sup> MD

14 Daniel M Farewell<sup>1</sup> PhD

15  
16 James White<sup>2</sup> PhD

17  
18 Ronan A Lyons<sup>3</sup> MD

19  
20 Frank D Dunstan<sup>1</sup> DPhil  
21  
22  
23  
24  
25

26 1. Institute of Primary Care & Public Health, School of Medicine, Heath Park, Cardiff  
27 University, Cardiff, CF14 4YS, UK  
28

29 2. Centre for the Development and Evaluation of Complex Public Health Interventions,  
30 School of Medicine, Cardiff University, Heath Park, Cardiff, CF14 4YS, UK  
31  
32

33 3. College of Medicine, Swansea University, Swansea SA2 8PP, UK  
34  
35  
36  
37  
38

39 Corresponding author:

40 Professor David L Fone

41 Institute of Primary Care & Public Health, School of Medicine, 4th Floor Neuadd

42 Merionnydd, Heath Park, Cardiff University, Cardiff, CF14 4YS, UK  
43  
44

45 Telephone 02920 687241, Fax 02920 687236, e-mail foned@cf.ac.uk  
46  
47  
48  
49  
50

51  
52 **Keywords**  
53

54 Alcohol, Social epidemiology, multilevel modelling, Public Health  
55  
56  
57  
58  
59  
60

## ABSTRACT

### Objectives

The influence of neighbourhood deprivation on the risk of harmful alcohol consumption, measured by the separate categories of excess consumption and binge drinking, has not been studied. The study objective was to investigate the effect of neighbourhood deprivation with age, gender and socio-economic status (SES) on (1) excess alcohol consumption, and (2) binge drinking, in a representative population survey.

### Design

Cross-sectional study: multi-level analysis.

### Setting

Wales, UK, adult population ~ 2.2 million.

### Participants

58 282 respondents aged 18 years and over to four successive annual Welsh Health Surveys (2003/04-2007), nested within 32 692 households, 1839 census lower super output areas and the 22 unitary authority areas in Wales.

### Primary outcome measure

Maximal daily alcohol consumption during the past week was categorised using the UK Department of Health definition of 'none/never drinks', 'within guidelines', 'excess consumption but less than binge' and 'binge'. The data were analysed using continuation ratio ordinal multilevel models with multiple imputation for missing covariates.

## Results

Respondents in the most deprived neighbourhoods were more likely to binge drink than in the least deprived (adjusted estimates: 17.5% vs. 10.6%; difference = 6.9%, 95% CI: 6.0 to 7.8), but were less likely to report excess consumption (17.6% vs. 21.3%; difference = 3.7%, 95% CI: 2.6 to 4.8). The effect of deprivation varied significantly with age and gender, but not with SES. Younger males in deprived neighbourhoods were most likely to binge drink. Males aged 35-64 showed the steepest increase in binge drinking in deprived neighbourhoods but males aged 18-24 showed a smaller increase with deprivation.

## Conclusion

This large-scale population study is the first to show that neighbourhood deprivation acts differentially on the risk of binge drinking between males and females at different age groups. Understanding the socio-economic patterns of harmful alcohol consumption is important for public health policy development.

## ARTICLE SUMMARY

### Article Focus

- A recent systematic review found little evidence that living in neighbourhoods of high socio-economic deprivation is associated with a higher risk of harmful alcohol consumption
- The important distinction between excess alcohol consumption and binge drinking has not previously been investigated

### Key Messages

- A higher risk of binge drinking was found in residents living in deprived neighbourhoods, particularly in young and middle-aged men
- A higher risk of excess consumption, but less than binge, was found in residents of less deprived neighbourhoods
- Neighbourhood socio-economic deprivation is an important factor to consider in public health alcohol policy development

### Strengths and Limitations

- The main strength is the large representative dataset of over 58 000 respondents, or around one in fifty of the socially diverse Welsh adult population. The ordinal alcohol consumption outcome measure was based on a widely used definition published by the UK Department of Health



1  
2  
3  
4  
5  
6  
7  
8  
9  
10  
11  
12  
13  
14  
15  
16  
17  
18  
19  
20  
21  
22  
23  
24  
25  
26  
27  
28  
29  
30  
31  
32  
33  
34  
35  
36  
37  
38  
39  
40  
41  
42  
43  
44  
45  
46  
47  
48  
49  
50  
51  
52  
53  
54  
55  
56  
57  
58  
59  
60

- The cross-sectional analysis used the administratively defined census LSOA as a proxy for ‘neighbourhood’ and cannot investigate the possibility of causal relationships. Social desirability bias may result in under-reported alcohol consumption, although it is not known whether this varies between neighbourhoods.

For peer review only

## INTRODUCTION

Excess alcohol consumption causes a major global burden of disease, injury and social and economic cost.[1] Binge drinking, typically defined as consuming at least double the guideline limits in a single day during the previous week,[2] is an increasing problem which is rising particularly in young women.[3] It is associated with anti-social behaviour,[4] and around half of all violent crimes in the UK.[5] Binge drinking causes an extra burden on health services; between 20-40 % of people presenting to accident and emergency departments are intoxicated, increasing to 80% after midnight.[4] Recent data show that around 37% of men and 29% of women exceeded the current UK guidelines for safe levels of alcohol consumption of  $\leq 3$  units per day for women and  $\leq 4$  units per day for men in the past week; and 20% of men and 13% of women engaged in binge drinking, defined as  $> 6$  units per day for women and  $> 8$  units per day for men.[6] Given the wide range of harm resulting from this substantial level of consumption, the potential impact on health at the population level from a reduction in consumption is considerable.

Research investigating the socio-economic patterning of harmful alcohol consumption has generally found that lower socio-economic status (SES) groups drink more heavily and higher SES groups drink more frequently,[7] consistent with binge drinking being found to be more prevalent in the economically disadvantaged.[8] However, subtle variations in cut-points based on units have led to prevalence estimates for binge drinking in young men to differ by 22%,[2] and these summary SES relationships have been found to vary substantially with age, gender, educational level, employment status and the measure of consumption.[2,7-12]

In addition to socio-economic effects found at the individual level, it is theorised that small-area, or neighbourhood, socio-economic deprivation might exert an independent effect on

1  
2  
3 harmful alcohol consumption. However, a recent systematic review which included multilevel  
4  
5 studies of neighbourhood deprivation and alcohol consumption found little evidence to  
6  
7 support this hypothesis.[13] Of the four multilevel studies which were classified as rigorous in  
8  
9 a quality assessment, one study set in the West of Scotland, UK, found no significant  
10  
11 association between neighbourhood deprivation and drinking above guideline limits or the  
12  
13 number of units consumed in the past week.[14] A second study set in California, USA, found  
14  
15 that the odds of heavy alcohol consumption (>7 drinks/week for females and >14 for males)  
16  
17 was significantly higher for people living in the least deprived neighbourhoods with no  
18  
19 significant variation with individual SES.[15]  
20  
21  
22  
23  
24

25 The two other studies described an association between high neighbourhood deprivation and  
26  
27 high consumption.[16,17] Data from the nationally representative Third National Health and  
28  
29 Nutrition Examination Survey (NHANES III, USA) found that a composite neighbourhood  
30  
31 deprivation measure at the level of the census tract was associated with heavy alcohol use,  
32  
33 defined as consuming five or more drinks almost every day (odds ratio 1.18; 95% CI: 1.01,  
34  
35 1.38), but it was not reported whether this association varied with age, gender or SES.[16] A  
36  
37 second US study found that higher mean income and income inequality at the larger  
38  
39 community district level was significantly associated with a higher number of drinks per  
40  
41 month among drinkers.[17] Four subsequent papers reporting small studies found no  
42  
43 significant association between alcohol consumption and neighbourhood income,[18,19]  
44  
45 neighbourhood unemployment,[20] or a composite measure of relative socio-economic  
46  
47 disadvantage,[21] while a further large-scale study of over 90 000 subjects set in Canada  
48  
49 found a small effect of neighbourhood deprivation on the number of drinks consumed per  
50  
51 week in men, but not in women.[22]  
52  
53  
54  
55  
56  
57  
58  
59  
60

1  
2  
3 Possible explanations for these inconsistencies in neighbourhood associations found between  
4 studies may result from different methods of defining excess, or harmful, consumption, with  
5 some choosing definitions based on national guidelines for 'safe' consumption or units,[14]  
6 number of drinks,[15-19,21,22] or frequency of consumption.[19,20] Additional explanations  
7 for inconsistent neighbourhood associations may result from different measures of area  
8 deprivation, sizes of neighbourhood, and adjustment for different individual-level risk factors  
9 for excess alcohol consumption.[14-22]  
10  
11  
12  
13  
14  
15  
16  
17  
18  
19

20  
21 Despite the substantial public health consequences of alcohol consumption and the possible  
22 importance of neighbourhood in explaining patterns of consumption, no previous study to our  
23 knowledge has investigated multilevel associations with neighbourhood deprivation which  
24 distinguish between excess consumption and binge drinking as distinct categories. Little is  
25 known on whether any associations vary within population groups. The aim of the present  
26 study was to investigate the effect of neighbourhood deprivation with age, gender and SES on  
27 (1) excess alcohol consumption above guideline limits, and (2) binge drinking, in a  
28 representative sample of the adult population of Wales, UK.  
29  
30  
31  
32  
33  
34  
35  
36  
37  
38  
39  
40  
41  
42  
43  
44  
45  
46  
47  
48  
49  
50  
51  
52  
53  
54  
55  
56  
57  
58  
59  
60

## METHODS

### Participants

Data were drawn from four successive cross-sectional waves of the Welsh Health Survey 2003/04 to 2007, an interviewer-led household and individual survey of the adult population resident in Wales, UK.[23-25] The adult population of Wales is approximately 2.2 million (2001 Census) and the dataset available included a total of 60 555 adults aged 18 years and over. The sampling methods and the survey process are described in detail elsewhere.[24,25] Briefly, the sampling frame used was the Post Office's Postcode Address File. Private household addresses were randomly selected in a two stage design, sampling addresses within primary sampling units that were selected within the 22 unitary authority local government areas in Wales. Each adult member of the household was invited to complete a questionnaire. Response rates were high: in 2003/04 the adjusted household survey response was 74% with 85% of individuals responding within households,[24] with little change at 74% and 82% respectively in 2007.[25]

### Alcohol outcome measure

Participants were asked to state the highest number of units they had drunk on any one day in the previous seven days, using a standard prompt to convert different types and quantities of alcoholic drinks into units. The dataset provided the classification of units into ordinal categories of maximal daily consumption based on the UK Department of Health definitions (Table 1), with categories for 'none/never drinks', 'within guidelines', 'excess consumption but less than binge, and 'binge'. [26]

**Table 1 Categorisation of the alcohol consumption outcome variable**

| Category                               | Maximum units drunk on any one day in the last week                                                         |
|----------------------------------------|-------------------------------------------------------------------------------------------------------------|
| None/never drinks                      | Did not drink in the last seven days                                                                        |
| Within guidelines                      | Men drinking no more than 4 units, women no more than 3 units                                               |
| Excess consumption but less than binge | Men drinking more than 4 and up to and including 8 units, women more than 3 and up to and including 6 units |
| Binge                                  | Men drinking more than 8 units, women more than 6 units                                                     |

Source: reference 26

### Neighbourhood deprivation measure

The Welsh Index of Multiple Deprivation 2005 (WIMD2005) was used as the measure of neighbourhood deprivation.[27] The Index includes seven weighted domains of deprivation: income (25%), employment (25%), education (15%), health (15%), geographical access to services (10%), housing (5%), and physical environment (5%). These neighbourhood deprivation scores are available for lower super output areas (LSOA), a unit of statistical geography defined by the 2001 UK Census.[28] There are 1896 LSOAs in Wales which have a mean population size of around 1500. Since the data included in each neighbourhood deprivation domain are measured on different scales, each domain score is transformed to have a range of zero to 100 and the overall index is calculated using a weighted average, [27] taking a range of 1.4 to 78.9. This measure of neighbourhood deprivation is highly correlated with the well-established Townsend index,[29] Spearman's  $r = 0.86$ ,  $n=1896$ ,  $p<0.001$ .

We used the LSOA as the closest available proxy for neighbourhood. Neighbourhood characteristics vary widely within Wales, from high to low levels of socioeconomic disadvantage, including deprived urban inner-city areas, less deprived city sub-urban

1  
2  
3 residential areas, post-industrial valley towns, market towns and rural, farming areas.

4  
5 Respondents were linked to their neighbourhood of residence by the data owners (the Welsh  
6  
7 Government) and the dataset included individuals living in 1839 LSOAs, nested within the 22  
8  
9 unitary authorities (UA) in Wales. Each LSOA was assigned to one of five ordinal categories  
10  
11 of neighbourhood deprivation with equal counts of LSOAs in each quintile.  
12  
13

### 14 15 16 17 18 **Measures of individual SES and potential confounding variables**

19  
20 The principal measure of SES defined for the analysis was the National Statistics Socio-  
21  
22 economic Classification (NS-SEC3) variable for the head of household. This is a measure of  
23  
24 occupational social class with the following categories: professional/managerial, intermediate,  
25  
26 routine and manual occupations, and never worked/long-term unemployed. Age was analysed  
27  
28 in 10-year bands by gender. We considered other available measures of SES that were  
29  
30 associated with alcohol consumption in the dataset as confounding variables: individual  
31  
32 employment status (employed, seeking work, training/student, retired, permanently sick or  
33  
34 disabled, at home), highest educational qualification (degree, intermediate, none), ethnicity  
35  
36 (White, Black and minority ethnic) and housing tenure (owner occupier, social and private  
37  
38 renting) (table 2).  
39  
40  
41  
42  
43  
44

45 Of the 60 555 respondents, 58 282 individuals living within 32 692 households completed the  
46  
47 questions on alcohol consumption, and 50 641 had complete covariate information recorded  
48  
49 in the dataset.  
50  
51  
52  
53  
54  
55  
56  
57  
58  
59  
60

## Statistical Analysis

Since the outcome measure is an ordered categorical variable, the data were analysed using a continuation ratio model,[30] which allowed estimation of the association between neighbourhood deprivation and the likelihood of moving up one category of alcohol consumption,  $y$ , (e.g. from excess consumption but less than binge, to binge drinking). This continuation ratio approach used a linear predictor,  $\eta_k$ , to explain the probability of continuing to a higher category, conditional on reaching a certain ordinal level. The linear predictor was modelled by covariates  $x_k$  and fixed effects  $\beta$  :

$$\text{logit } p(y > k \mid y \geq k) = \eta_k = x_k \beta$$

This extends naturally to the multilevel framework, where we adopted the random effects model:

$$\text{logit } p(y > k \mid y \geq k, b) = x_k \beta + z_k b$$

where the linear predictor now has two components:  $x_k \beta$  are the fixed effects, and  $z_k b$  described the multilevel structure in the data. Again, in principle the influence of both fixed and random effects may vary according to the level  $k$ .

We estimated the regression coefficients  $\beta$  and the covariance matrix  $\text{Var}(b)$  and we derived  $p(y=k \mid b=0)$ , the predicted probabilities of membership of ordinal category  $k$  for the median geographical context  $b=0$  for each quintile of deprivation and category of SES.

To model the variation in the four-category ordinal alcohol consumption outcome using a



1  
2  
3 continuation ratio model, we defined three additional binary explanatory variables, one for  
4  
5 each transition between the alcohol outcome categories to indicate the level at which the  
6  
7 transition was occurring. The sequential modelling strategy started with the “null” four-level  
8  
9 variance components model, with category-specific intercepts and random effects for  
10  
11 households, LSOAs and UAs. The neighbourhood deprivation categorical variable was fitted  
12  
13 to estimate the unadjusted neighbourhood deprivation fixed effects in model 1. To allow a  
14  
15 better understanding of the effects of deprivation on alcohol consumption, we fitted  
16  
17 interactions between the neighbourhood deprivation quintiles and each additional explanatory  
18  
19 variable indicating the relevant binary transition. The predicted probabilities of excess  
20  
21 consumption and binge drinking were derived from the sum of these main effects and relevant  
22  
23 interaction coefficients.  
24  
25  
26  
27  
28

29 Social class, age group, gender, the interaction between age group and gender, and the  
30  
31 potential confounders were then added to form model 2. The final model 3 was fitted with  
32  
33 cross-level interactions in separate models for neighbourhood deprivation interacting with age  
34  
35 group and gender, and neighbourhood deprivation with social class. Multiple imputation of  
36  
37 five datasets using chained equations in R software was used to account for missing  
38  
39 covariates.[31,32]  
40  
41  
42  
43  
44

45 The magnitude of the variation between LSOAs and between UAs was estimated using the  
46  
47 standard deviation (SD) of their random effects, since these are measured on the same scale as  
48  
49 the fixed effects for observed covariates. The quartiles of a standard normal variable lie at +/-  
50  
51 0.67, and the differences between LSOA and between UA quartiles were computed by  
52  
53 1.34\*SD to compare with the magnitude of the estimated fixed effects for social class.  
54  
55  
56  
57  
58  
59  
60

## RESULTS

### Descriptive analysis

Overall, 22 218 (38.1%) of the total 58 282 respondents reported their levels of alcohol consumption as 'none or never drinks', 16 059 (27.6%) reported 'within guidelines', 9664 (16.6%) reported 'excess consumption but less than binge' and 10 341 (17.7%) reported 'binge' drinking. Both excess consumption and particularly binge drinking were higher in males than females. Excess consumption was highest in the 35-64 year age groups and binge drinking was highest in 18-34 year olds, declining with increasing age (table 2). The 'never worked and long-term unemployed' group and respondents with no educational qualifications showed substantially lower levels of both excess consumption and binge drinking than the three higher social class groups and those with some educational achievement. For employment status, the economically active who were employed or seeking work had higher levels of excess and binge consumption than economically inactive respondents. The proportion of respondents drinking to excess decreased with increasing neighbourhood deprivation but binge drinking showed the opposite pattern of increasing with higher deprivation (table 2).

**Table 2 Excess alcohol consumption and binge drinking by socio-economic status**

|                                      |                                         | Excess<br>consumption,<br>less than binge | %    | Binge | %    | Total |
|--------------------------------------|-----------------------------------------|-------------------------------------------|------|-------|------|-------|
| Gender*                              | Female                                  | 4702                                      | 15.0 | 3482  | 11.1 | 31261 |
|                                      | Male                                    | 4962                                      | 18.4 | 6859  | 25.4 | 27021 |
| Age group**                          | 18-24                                   | 1001                                      | 14.5 | 2041  | 29.6 | 6888  |
|                                      | 25-34                                   | 1286                                      | 17.5 | 2105  | 28.7 | 7329  |
|                                      | 35-44                                   | 2007                                      | 19.6 | 2427  | 23.7 | 10225 |
|                                      | 45-54                                   | 2110                                      | 21.5 | 1931  | 19.7 | 9815  |
|                                      | 55-64                                   | 1961                                      | 19.2 | 1268  | 12.4 | 10216 |
|                                      | 65-74                                   | 951                                       | 12.4 | 444   | 5.8  | 7697  |
|                                      | 75-84                                   | 316                                       | 6.4  | 106   | 2.2  | 4923  |
|                                      | 85+                                     | 32                                        | 2.7  | 19    | 1.6  | 1189  |
| Social class**                       | Professional and managerial occupations | 3850                                      | 19.5 | 3354  | 17.0 | 19699 |
|                                      | Intermediate occupations                | 1742                                      | 16.1 | 1873  | 17.3 | 10802 |
|                                      | Routine and manual occupations          | 3566                                      | 14.7 | 4397  | 18.2 | 24197 |
|                                      | Never worked and long-term unemployed   | 131                                       | 8.9  | 173   | 11.8 | 1465  |
| Employment status**                  | Employed                                | 5766                                      | 20.9 | 6961  | 25.2 | 27571 |
|                                      | Seeking work                            | 138                                       | 14.9 | 274   | 29.6 | 925   |
|                                      | Training/student                        | 483                                       | 14.8 | 739   | 22.6 | 3273  |
|                                      | Permanently sick or disabled            | 599                                       | 13.0 | 547   | 11.8 | 4619  |
|                                      | Retired                                 | 1539                                      | 11.8 | 755   | 5.8  | 13091 |
|                                      | At home                                 | 696                                       | 13.2 | 507   | 9.6  | 5284  |
|                                      | Other                                   | 276                                       | 14.9 | 349   | 18.8 | 1856  |
| Highest educational qualification**  | No qualifications                       | 2140                                      | 12.6 | 2095  | 12.3 | 17026 |
|                                      | Intermediate qualifications             | 5405                                      | 18.3 | 6428  | 21.7 | 29601 |
|                                      | Degree/degree equivalent and above      | 1773                                      | 21.5 | 1445  | 17.5 | 8247  |
| Tenure**                             | Owner occupier                          | 8010                                      | 17.5 | 7883  | 17.2 | 45725 |
|                                      | Social renting                          | 956                                       | 11.8 | 1340  | 16.5 | 8123  |
|                                      | Private renting / Other                 | 663                                       | 15.6 | 1085  | 25.5 | 4262  |
| Ethnicity*                           | White                                   | 9492                                      | 16.8 | 10165 | 18.0 | 56438 |
|                                      | Black and minority ethnic               | 108                                       | 8.8  | 100   | 8.2  | 1222  |
| Neighbourhood deprivation quintile** | Least deprived                          | 2304                                      | 19.5 | 1967  | 16.7 | 11786 |
|                                      | Less deprived                           | 2111                                      | 17.2 | 1927  | 15.7 | 12267 |
|                                      | Mid deprived                            | 2063                                      | 16.0 | 2219  | 17.2 | 12875 |
|                                      | More deprived                           | 1726                                      | 15.0 | 2234  | 19.4 | 11544 |
|                                      | Most deprived                           | 1460                                      | 14.9 | 1994  | 20.3 | 9810  |

\*  $\chi^2$  test,  $p < 0.001$ \*\*  $\chi^2$  test for trend,  $p < 0.001$

### Multilevel models

The model 1 parameter estimates for the neighbourhood deprivation fixed effects and the interaction effects are shown in table 3, together with the unadjusted model predicted probabilities for the five neighbourhood deprivation quintiles. The probabilities of excess consumption and binge drinking were computed from the sum of the fixed and interaction estimates for each neighbourhood deprivation quintile. As we found in the descriptive analysis, the probability of excess consumption was higher in less deprived neighbourhoods with decreasing probability across the quintiles of deprivation. Binge drinking showed the opposite pattern of increasing probability with higher deprivation. The differences in magnitude between the model predicted probabilities and the descriptive data shown in table 2 are explained by the addition of the random effects in model 1.

Table 3 then shows the estimates for the neighbourhood deprivation fixed and interaction effects from model 2, which included social class, age group, gender, the interaction between age group and gender, and the other confounding variables. The sum of the estimates for the fixed and interaction effects for the neighbourhood deprivation quintiles were used as in model 1 to compute the probabilities of excess consumption and binge drinking. In this adjusted model, the difference between the deprivation quintiles for the probability of binge drinking increased, with less effect on the excess consumption category. Respondents in the most deprived neighbourhoods were more likely to binge drink than in the least deprived (adjusted estimates: 17.5% vs. 10.6%; difference in proportions = 6.9%, 95% CI: 6.0 to 7.8), but were less likely to report excess consumption (17.6% vs. 21.3%; difference in proportions = 3.7%, 95% CI: 2.6 to 4.8).

1  
2  
3 Table 3 finally shows the predicted probabilities of consumption for the SES categories in the  
4  
5 fully adjusted model 2. There was little variation in excess consumption with SES. The  
6  
7 descriptive analysis finding of a higher probability of binge drinking in the three higher social  
8  
9 class groups compared to the never worked/long-term unemployed category remained after  
10  
11 adjustment.  
12  
13  
14  
15  
16  
17  
18  
19  
20  
21  
22  
23  
24  
25  
26  
27  
28  
29  
30  
31  
32  
33  
34  
35  
36  
37  
38  
39  
40  
41  
42  
43  
44  
45  
46  
47  
48  
49  
50  
51  
52  
53  
54  
55  
56  
57  
58  
59  
60

**Table 3 Model parameter estimates and predicted probabilities (%) for excess alcohol consumption and binge drinking for neighbourhood deprivation and SES**

|                                      | Parameter estimate (SE) | Excess consumption, less than binge % | Binge % |
|--------------------------------------|-------------------------|---------------------------------------|---------|
| <b>Model 1<sup>a</sup></b>           |                         |                                       |         |
| Neighbourhood deprivation quintiles: |                         |                                       |         |
| Least deprived                       | Reference               | 22.2                                  | 9.7     |
| Less deprived                        | -0.2042* (0.0372)       | 20.1                                  | 9.9     |
| Mid deprived                         | -0.4105* (0.0370)       | 19.1                                  | 11.2    |
| More deprived                        | -0.6544* (0.0375)       | 17.6                                  | 12.6    |
| Most deprived                        | -0.8526* (0.0391)       | 17.2                                  | 12.6    |
| Interaction:                         |                         |                                       |         |
| Within to excess: Less deprived      | 0.2033* (0.0446)        |                                       |         |
| Excess to binge: Less deprived       | 0.3254* (0.0565)        |                                       |         |
| Within to excess: Mid deprived       | 0.5656* (0.0443)        |                                       |         |
| Excess to binge: Mid deprived        | 0.7054* (0.0554)        |                                       |         |
| Within to excess: More deprived      | 0.9931* (0.0459)        |                                       |         |
| Excess to binge: More deprived       | 1.1510* (0.0563)        |                                       |         |
| Within to excess: Most deprived      | 1.3587* (0.0489)        |                                       |         |
| Excess to binge: Most deprived       | 1.3692* (0.0584)        |                                       |         |
| <b>Model 2<sup>b</sup></b>           |                         |                                       |         |
| Neighbourhood deprivation quintiles: |                         |                                       |         |
| Least deprived                       | Reference               | 21.3                                  | 10.6    |
| Less deprived                        | -0.1973* (0.0387)       | 19.5                                  | 11.1    |
| Mid deprived                         | -0.3879* (0.0386)       | 18.8                                  | 13.0    |
| More deprived                        | -0.6073* (0.0395)       | 17.5                                  | 15.3    |
| Most deprived                        | -0.7142* (0.0421)       | 17.6                                  | 17.5    |
| Interaction:                         |                         |                                       |         |
| Within to excess: Less deprived      | 0.1954* (0.0470)        |                                       |         |
| Excess to binge: Less deprived       | 0.3282* (0.0588)        |                                       |         |
| Within to excess: Mid deprived       | 0.5720* (0.0467)        |                                       |         |
| Excess to binge: Mid deprived        | 0.7296* (0.0577)        |                                       |         |
| Within to excess: More deprived      | 1.0157* (0.0483)        |                                       |         |
| Excess to binge: More deprived       | 1.2033* (0.0586)        |                                       |         |
| Within to excess: Most deprived      | 1.3996* (0.0514)        |                                       |         |
| Excess to binge: Most deprived       | 1.4615* (0.0608)        |                                       |         |
| <b>SES</b>                           |                         |                                       |         |
| Professional/managerial              | Reference               | 19.8                                  | 14.6    |
| Intermediate                         | -0.0973* (0.0265)       | 19.0                                  | 13.0    |
| Routine occupations                  | -0.1519* (0.0226)       | 18.6                                  | 12.2    |
| Never worked/long-term unemployed    | -0.3339* (0.0614)       | 17.1                                  | 9.7     |

1  
2  
3 a Model 1 included fixed effects terms for neighbourhood deprivation quintiles and the  
4  
5 interaction with the binary transition explanatory variable for change in category of  
6  
7 consumption, and random effects terms for household, LSOA and unitary authority  
8

9  
10 b Model 2 added social class, age group, gender, age group\*gender, and adjusted for  
11  
12 employment status, highest educational qualification, ethnicity, and housing tenure  
13

14 \* p<0.001  
15  
16  
17  
18  
19  
20  
21  
22  
23  
24  
25  
26  
27  
28  
29  
30  
31  
32  
33  
34  
35  
36  
37  
38  
39  
40  
41  
42  
43  
44  
45  
46  
47  
48  
49  
50  
51  
52  
53  
54  
55  
56  
57  
58  
59  
60

For peer review only

1  
2  
3 The two-way cross-level interaction between neighbourhood deprivation, age group and  
4  
5 gender showed the effect of neighbourhood deprivation on the probability of excess  
6  
7 consumption and binge drinking varied significantly between age group and gender. These  
8  
9 model outputs are shown on the probability scale for ease of interpretation in figures 1 and 2.  
10  
11 Little evidence of a cross-level interaction in females or older age groups was found for either  
12  
13 excess consumption or binge drinking. Males had a higher probability of excess consumption  
14  
15 in less deprived neighbourhoods than females. Although the probability of binge drinking in  
16  
17 females increased with increasing deprivation quintile, the gradients were significantly  
18  
19 steeper in males. The probability of binge drinking was highest at all levels of neighbourhood  
20  
21 deprivation in males aged 25 to 34. The interaction effects suggested that males in the 35-64  
22  
23 year age groups showed the steepest increase in the probability of binge drinking associated  
24  
25 with increasing neighbourhood deprivation, while the interaction effect in the 18-24 year age  
26  
27 group suggested a weaker association of increasing binge drinking with increasing  
28  
29 deprivation. The cross-level interaction between neighbourhood deprivation and social class  
30  
31 was not significant suggesting that the association of excess consumption and binge drinking  
32  
33 with neighbourhood deprivation did not vary with SES.  
34  
35  
36  
37  
38  
39

#### 40 Random effects variance

41  
42 The values for the intra-class correlation coefficients (%) given in table 4 show that the  
43  
44 majority of the unexplained random variation occurred at the household level, suggesting that,  
45  
46 as expected, drinking behaviour tends to cluster more within households than within  
47  
48 neighbourhoods or within the larger-area UA. To examine the magnitude of the variation  
49  
50 between neighbourhoods in comparison to the fixed-effect estimates for SES, the SD for  
51  
52 LSOAs in model 2 = 0.156, giving the inter-quartile range of the distribution of the LSOA  
53  
54 variance = 0.21. This compares to a parameter estimate of -0.33 for the 'never worked'  
55  
56  
57  
58  
59  
60



category of social class, of -0.15 for 'routine' occupations and -0.10 for the 'intermediate' category, compared to the professional/managerial category (table 3). The size of this variation is of similar magnitude to the social class estimates, which suggests there is important unexplained variation that can be attributed to LSOAs. Similarly, for UAs, the inter-quartile range = 0.16, suggesting that the magnitude of the UA random variation, although smaller than LSOA, remains of importance in explaining the spatial pattern of alcohol consumption.

**Table 4 Random effects variance in sequential multilevel models**

|                      | Level | Variance | SD    | Intra-class correlation (%) |
|----------------------|-------|----------|-------|-----------------------------|
| Null model           | HH    | 0.809    | 0.899 | 74.4                        |
|                      | LSOA  | 0.032    | 0.179 | 14.8                        |
|                      | UA    | 0.017    | 0.130 | 10.8                        |
| Model 1 <sup>a</sup> | HH    | 0.824    | 0.908 | 74.8                        |
|                      | LSOA  | 0.028    | 0.167 | 13.8                        |
|                      | UA    | 0.019    | 0.139 | 11.4                        |
| Model 2 <sup>b</sup> | HH    | 0.867    | 0.931 | 77.1                        |
|                      | LSOA  | 0.024    | 0.156 | 12.9                        |
|                      | UA    | 0.015    | 0.121 | 10.0                        |
| Model 3 <sup>c</sup> | HH    | 0.866    | 0.931 | 77.3                        |
|                      | LSOA  | 0.023    | 0.153 | 12.7                        |
|                      | UA    | 0.014    | 0.120 | 10.0                        |

a Model 1 included fixed effects terms for neighbourhood deprivation quintiles and the interaction with the binary transition explanatory variable for change in category of consumption, and random effects terms for household, LSOA and unitary authority

b Model 2 added social class, age group, gender, age group\*gender, and adjusted for employment status, highest educational qualification, ethnicity, and housing tenure

c Model 3 further included the two-way cross-level interaction between neighbourhood deprivation quintile, age group and gender

## DISCUSSION

### Main results

The current study has investigated the difference in associations between neighbourhood deprivation and excess alcohol consumption and binge drinking as ordinal categories, based on the UK definition.[26] This is because it has been suggested that it is more appropriate to set benchmarks for daily than for weekly consumption of alcohol following greater concern about the health and social risks associated with single episodes of intoxication.[6] Excess consumption was more common in less deprived neighbourhoods. In contrast, binge drinking was more common in deprived neighbourhoods. These findings add to the previous US and Canadian studies which showed a significant neighbourhood effect,[16,17,22] by further assessing the complex interacting effects of neighbourhood deprivation with consumption category, age and gender, and social class. The interaction effect of neighbourhood deprivation with age and gender showed the steepest increase in binge drinking with deprivation was in middle-aged males with no significant interaction with social class. We also found a substantial variation between neighbourhoods, since the magnitude of the unexplained variance in alcohol consumption was similar to the effect sizes of individual SES.

### Possible mechanisms linking neighbourhood deprivation to harmful alcohol consumption

Three mechanisms have been proposed to explain how neighbourhood deprivation might exert an independent effect on the risk of harmful alcohol consumption, and a differential effect on middle-aged males.[16] First, the contagion hypothesis suggests that health behaviours are spread by social exchange and particularly social networks of personal friends.[33] Thus, binge drinking may be more acceptable in middle-aged men resident in deprived

1  
2  
3 neighbourhoods than in the non-deprived. Second, the stress of living in areas of high  
4  
5 neighbourhood disadvantage may make men more vulnerable to psychological  
6  
7 distress.[34,35] This then increases the risk that alcohol is used as a coping mechanism.  
8  
9

10  
11  
12 Third, the structural hypothesis argues that neighbourhood social norms and institutions  
13  
14 define the pattern of health behaviours.[36] Greater availability of cheap alcohol measured as  
15  
16 higher alcohol outlet densities might influence harmful drinking rates, although the evidence  
17  
18 summarised in systematic reviews of both cross-sectional and longitudinal studies is  
19  
20 inconsistent.[37] There is some evidence that high deprivation neighbourhoods have a higher  
21  
22 density of alcohol outlets,[15,38,39] and this might provide a mechanism to explain higher  
23  
24 consumption in deprived neighbourhoods. However, two studies which found higher outlet  
25  
26 densities in more deprived areas found that levels of consumption were highest in less  
27  
28 deprived areas.[15,38] A third study found the spatial association between outlet density and  
29  
30 deprivation did not vary systematically, suggesting the relationship between deprivation and  
31  
32 outlet density may be different in different locations.[39] This deprivation-density hypothesis  
33  
34 could not explain the findings of higher rates of excess consumption in the least deprived  
35  
36 neighbourhoods in the current study. One possibility is the acceptance of social norms of  
37  
38 regular drinking to excess, but not episodic binge drinking, in less deprived areas compared to  
39  
40 a different set of social normative binge drinking behaviour in the most deprived areas.  
41  
42  
43  
44  
45  
46

### 47 **Strengths and limitations**

48  
49 Since 2003/04, the Welsh Health Survey has been an annual source of robust population  
50  
51 survey data. It has the important strength of a large sampling fraction resulting in a  
52  
53 representative response dataset that includes around one in fifty of the socially diverse Welsh  
54  
55 adult population, with detailed exposure data linked to the small-area neighbourhood. The  
56  
57  
58  
59  
60

1  
2  
3 study findings from such a comprehensive dataset should be widely generalisable. Several  
4  
5 limitations should be considered. The alcohol consumption outcome measure was based on a  
6  
7 widely used definition published by the UK Department of Health.[26] However, the  
8  
9 possibility of social desirability bias resulting in under-reported alcohol consumption should  
10  
11 be considered,[40,41] although it is not known whether under-reporting varies between  
12  
13 neighbourhoods. The questionnaire responses were consistent year-on-year from four  
14  
15 different successive samples, suggesting that responses were reliable. Non-response bias was  
16  
17 a possibility but the surveys had a consistently good overall response to the interviewer-led  
18  
19 method,[24,25]  
20  
21  
22  
23  
24

25 The administratively defined census LSOA was used as a proxy for ‘neighbourhood’.  
26  
27 However, the direction of bias from using non-homogeneous administrative areas is towards  
28  
29 conservative estimates.[42,43] Therefore it is unlikely that the current study over-estimated  
30  
31 the associations between alcohol consumption and neighbourhood deprivation. Finally, no  
32  
33 inferences about causal processes can be made. Reverse cause, for example, could suggest  
34  
35 that binge drinking causes a decline in social position, but this explanation seems unlikely for  
36  
37 excess alcohol consumption in which the associations were in the opposite direction to binge  
38  
39 drinking. A further limitation was that the dataset did not permit investigation of the possible  
40  
41 mechanisms for our study findings.  
42  
43  
44  
45  
46

47 In conclusion, the socio-economic patterning of excess alcohol consumption and binge  
48  
49 drinking was complex. The study findings have implications for enhancing public health  
50  
51 alcohol policy development, emphasising the importance of neighbourhood deprivation, as  
52  
53 measured primarily by levels of low income and unemployment, as a determinant of harmful  
54  
55 levels of consumption. Further longitudinal research on the spatial relationships between  
56  
57  
58  
59  
60

1  
2  
3  
4  
5  
6  
7  
8  
9  
10  
11  
12  
13  
14  
15  
16  
17  
18  
19  
20  
21  
22  
23  
24  
25  
26  
27  
28  
29  
30  
31  
32  
33  
34  
35  
36  
37  
38  
39  
40  
41  
42  
43  
44  
45  
46  
47  
48  
49  
50  
51  
52  
53  
54  
55  
56  
57  
58  
59  
60

alcohol consumption, outlet density, and socio-economic deprivation at individual and neighbourhood levels is necessary to further understand the underlying processes and provide further evidence for local and national policies to reduce alcohol-related harm.[44]

For peer review only

## COMPETING INTERESTS

None

## FUNDING

This work was supported by the Office of the Chief Social Research Officer (OCSRO), Welsh Government. [grant number 081218 SAP].

The work was undertaken at The Centre for the Development and Evaluation of Complex Interventions for Public Health Improvement, a UKCRC Public Health Research: Centre of Excellence. Funding from the British Heart Foundation, Cancer Research UK, Economic and Social Research Council (RES-590-28-0005), Medical Research Council, the Welsh Assembly Government and the Wellcome Trust (WT087640MA), under the auspices of the UK Clinical Research Collaboration, is gratefully acknowledged.

## Information Governance and data sharing

A formal data access agreement was signed with the Welsh Government in order to receive the dataset with the geographical variables for analysis. These data can only be accessed under such an agreement. There are no additional data available. Ethical approval was not required for this secondary analysis of an anonymised dataset.

## Contributorship

All authors contributed to the design of the study. DLF is principal investigator and wrote the first draft of the paper with JW. DMF carried out the statistical modelling, supported by FD. JW carried out the literature reviews. All authors contributed to the critical revision of the manuscript and read and approved the final version.

**REFERENCES**

[1] Rehm J, Mathers C, Popova S, et al. Global burden of disease and injury and economic cost attributable to alcohol use and alcohol use disorders. *Lancet* 2009;**373**:2223-33.

[2] McAlaney J, McMahon J. Establishing rates of binge drinking in the UK : Anomalies in the data. *Alcohol Alcohol* 2006;**41**:355-57.

[3] Smith L, Foxcroft D. *Drinking in the UK. An exploration of trends*. York: Joseph Rowntree Foundation 2009. ISBN: 978-1-85935-698-2.

[4] Hayward R, Sharp C. *Young people, crime and anti-social behaviour: findings from the 2003 Crime and Justice Survey. Home Office Research Findings 245*. London: Home Office 2005. ISSN 1473-8406.

[5] Richardson A, Budd T. *Home Office Research Studies 263. Alcohol, crime and disorder: a study of young adults*. London: Home Office 2003. ISBN-1-84082-961-3.

[6] Robinson S, Harris H. *Smoking and drinking among adults, 2009. A report on the 2009 General Lifestyle Survey*. London: Office for National Statistics 2011.

[7] Huckle T, You RQ, Casswell S. Socio-economic status predicts drinking patterns but not alcohol-related consequences independently. *Addiction* 2010;**105**:1192-202.

[8] Kuntsche E, Rehm J, Gmel G. Characteristics of binge drinkers in Europe. *Soc Sci Med* 2004;**59**:113-27.

1  
2  
3 [9] Jefferis BJ, Manor O, Power C. Social gradients in binge drinking and abstaining: trends  
4  
5 in a cohort of British adults. *J Epidemiol Community Health* 2007;**61**:150-3.  
6  
7

8  
9 [10] Marmot M. Inequality, deprivation and alcohol use. *Addiction* 1997;**92**:S13-S20.  
10  
11

12  
13 [11] Van Oers J. Alcohol consumption, alcohol-related problems, problem drinking, and  
14  
15 socioeconomic status. *Alcohol Alcoholism* 1999;**34**:78-88.  
16  
17

18  
19 [12] Hart C, Ecob R, Smith GD. People, places and coronary heart disease risk factors: a  
20  
21 multilevel analysis of the Scottish Heart Health Study archive. *Soc Sci Med* 1997;**45**:893-902.  
22  
23

24  
25 [13] Karriker-Jaffe KJ. Areas of disadvantage: a systematic review of effects of area-level  
26  
27 socioeconomic status on substance use outcomes. *Drug Alcohol Rev* 2011;**30**:84-95.  
28  
29

30  
31 [14] Ecob R, Macintyre S. Small area variations in health related behaviours; do these depend  
32  
33 on the behaviour itself, its measurement, or on personal characteristics? *Health Place*  
34  
35 2000;**6**:261-74.  
36  
37

38  
39 [15] Pollack CE, Cubbin C, Ahn D, et al. Neighbourhood deprivation and alcohol  
40  
41 consumption: does the availability of alcohol play a role? *Int J Epidemiol* 2005;**34**:772-80.  
42  
43

44  
45 [16] Stimpson JP, Ju H, Raji MA, et al. Neighborhood deprivation and health risk behaviors  
46  
47 in NHANES III. *Am J Health Behav* 2007;**31**:215-22.  
48  
49  
50  
51  
52  
53  
54  
55  
56  
57  
58  
59  
60



1  
2  
3 [17] Galea S, Ahern J, Tracy M, et al. Neighborhood income and income distribution and the  
4 use of cigarettes, alcohol, and marijuana. *Am J Prev Med* 2007;**32**:S195-202.  
5  
6

7  
8  
9 [18] Cornaz S, Taffe P, Santos-Eggimann B. Life-course socioeconomic environment and  
10 health risk behaviours. A multilevel small-area analysis of young-old persons in an urban  
11 neighbourhood in Lausanne, Switzerland. *Health Place* 2009;**15**:273-83.  
12  
13  
14

15  
16  
17 [19] Giskes K, Turrell G, Bentley R, et al. Individual and household-level socioeconomic  
18 position is associated with harmful alcohol consumption behaviours among adults. *Aust NZ J*  
19 *Publ Heal* 2011;**35**:270-7.  
20  
21  
22  
23

24  
25  
26 [20] Dzurova D, Spilkova J, Pikhart H. Social inequalities in alcohol consumption in the  
27 Czech Republic: a multilevel analysis. *Health Place* 2010;**16**:590-7.  
28  
29  
30

31  
32  
33 [21] Adams RJ, Howard N, Tucker G, et al. Effects of area deprivation on health risks and  
34 outcomes: a multilevel cross-sectional, Australian population study. *Int J Public Health*  
35 2009;**54**:183-92.  
36  
37  
38  
39

40  
41  
42 [22] Matheson FI, White HL, Moineddin R, et al. Drinking in context: the influence of gender  
43 and neighbourhood deprivation on alcohol consumption. *J Epidemiol Community Health*  
44 2012;**66**:e4. Epub 2011 Feb 17.  
45  
46  
47  
48

49  
50  
51 [23] Doyle-Francis M, Sadler K, Kingdon A, et al. *Welsh Health Survey User Guide*. National  
52 Centre for Social Research, Welsh Assembly Government 2011.  
53  
54  
55  
56  
57  
58  
59  
60

1  
2  
3 <http://wales.gov.uk/docs/statistics/2011/110127surveyguideen.pdf> (accessed 28 February  
4  
5 2013).

6  
7  
8  
9 [24] McGee A, Jotangia D, Prescott A, et al. *Welsh Health Survey - Year One Technical*  
10  
11 *Report*. National Centre for Social Research 2005.

12  
13 <http://wales.gov.uk/docs/statistics/2005/050701healthsurvey0304techen.pdf> (accessed 28  
14  
15 February 2013).

16  
17  
18  
19 [25] Fuller E, Heeks F. *Welsh Health Survey 2007 Technical Report*. National Centre for  
20  
21 Social Research 2005.

22  
23 [http://wales.gov.uk/topics/statistics/publications/publication-](http://wales.gov.uk/topics/statistics/publications/publication-archive/healthsurvey2007tech/?lang=en)  
24  
25 [archive/healthsurvey2007tech/?lang=en](http://wales.gov.uk/topics/statistics/publications/publication-archive/healthsurvey2007tech/?lang=en) (accessed 28 February 2013).

26  
27  
28  
29 [26] Department of Health, Home Office, Department for Education and Skills and  
30  
31 Department for Culture, Media and Sport. *Safe. Sensible. Social. The next steps in the*  
32  
33 *National Alcohol Strategy*. London: DH Publications 2007:3.

34  
35 [http://www.dh.gov.uk/prod\\_consum\\_dh/groups/dh\\_digitalassets/@dh/@en/documents/digital](http://www.dh.gov.uk/prod_consum_dh/groups/dh_digitalassets/@dh/@en/documents/digitalasset/dh_075219.pdf)  
36  
37 [asset/dh\\_075219.pdf](http://www.dh.gov.uk/prod_consum_dh/groups/dh_digitalassets/@dh/@en/documents/digitalasset/dh_075219.pdf) (accessed 28 February 2013).

38  
39  
40  
41 [27] Welsh Assembly Government. *Welsh Index of Multiple Deprivation 2005: Technical*  
42  
43 *report*

44  
45  
46  
47 <http://wales.gov.uk/cisd/publications/statpubs/wimd2005technical/en.pdf?lang=en> (accessed  
48  
49 28 February 2013).

50  
51  
52 [28] Office for National Statistics (2011). *Super Output Areas (SOAs)*.

1  
2  
3 [http://www.ons.gov.uk/ons/guide-method/geography/beginner-s-guide/census/super-output-](http://www.ons.gov.uk/ons/guide-method/geography/beginner-s-guide/census/super-output-areas--soas-/index.html)  
4 [areas--soas-/index.html](http://www.ons.gov.uk/ons/guide-method/geography/beginner-s-guide/census/super-output-areas--soas-/index.html) (accessed 28 February 2013).  
5  
6  
7  
8

9  
10 [29] Townsend P, Phillimore P, Beattie A. *Health and deprivation: inequality and the North*.  
11 London: Routledge, 1988.  
12

13  
14  
15  
16 [30] Agresti A. *An introduction to categorical data analysis*. 2<sup>nd</sup> ed. Hoboken, New Jersey:  
17 John Wiley & Sons, Inc 2007.  
18  
19

20  
21  
22  
23 [31] White IR, Royston P, Wood AM. Multiple imputation using chained equations: Issues  
24 and guidance for practice. *Stat Med* 2010;**30**:377-99.  
25  
26

27  
28  
29  
30 [32] van Buuren S, Groothuis-Oudshoorn K. mice: Multivariate Imputation by Chained  
31 Equations in R. *Journal of Statistical Software* 2011;**45**:1-67.  
32  
33

34  
35  
36 [33] Boardman JD, Finch BK, Ellison CG, et al. Neighborhood disadvantage, stress, and drug  
37 use among adults. *J Health Soc Behav* 2001;**42**:151-65.  
38  
39

40  
41  
42 [34] Hill TD, Ross CE, Angel RJ. Neighborhood disorder, psychophysiological distress, and  
43 health. *J Health Soc Behav* 2005;**46**:170-86.  
44  
45

46  
47  
48  
49 [35] Elliott M. The stress process in neighbourhood context. *Health Place* 2000;**6**:287-99.  
50  
51

52  
53  
54 [36] Morland K, Wing S, Diez Roux A, et al. Neighborhood characteristics associated with  
55 the location of food stores and food service places. *Am J Prev Med* 2002;**22**:23-9.  
56  
57  
58  
59  
60

1  
2  
3  
4  
5 [37] Popova S, Giesbrecht N, Bekmuradov D, et al. Hours and days of sale and density of  
6 alcohol outlets: Impacts on alcohol consumption and damage: A systematic review. *Alcohol*  
7 *Alcohol* 2009;**44**:500-16.  
8  
9

10  
11  
12  
13  
14 [38] Huckle T, Huakau J, Sweetsur P, et al. Density of alcohol outlets and teenage drinking:  
15 Living in an alcogenic environment is associated with higher consumption in a metropolitan  
16 setting. *Addiction* 2008;**103**:1614-21.  
17  
18  
19

20  
21  
22 [39] Ellaway A, Macdonald L, Forsyth A, et al. The socio-spatial distribution of alcohol  
23 outlets in Glasgow city. *Health Place* 2010;**16**:167-72.  
24  
25  
26

27  
28 [40] Embree BG, Whitehead PC. Validity and reliability of self-reported drinking behavior:  
29 dealing with the problem of response bias. *J Stud Alcohol* 1993;**54**:334-44.  
30  
31  
32

33  
34 [41] Stockwell T, Donath S, Cooper-Stanbury M, et al. Under-reporting of alcohol  
35 consumption in household surveys: a comparison of quantity-frequency, graduated-frequency  
36 and recent recall. *Addiction* 2004;**99**:1024-33.  
37  
38  
39

40  
41  
42 [42] Blakely TA, Woodward AJ. Ecological effects in multi-level studies. *J Epidemiol*  
43 *Community Health* 2000;**54**:367-74.  
44  
45  
46

47  
48  
49 [43] Stafford M, Duke-Williams O, Shelton N. Small area inequalities in health: Are we  
50 underestimating them? *Soc Sci Med* 2008;**67**:891-9.  
51  
52  
53  
54  
55  
56  
57  
58  
59  
60

1  
2  
3  
4  
5  
6  
7  
8  
9  
10  
11  
12  
13  
14  
15  
16  
17  
18  
19  
20  
21  
22  
23  
24  
25  
26  
27  
28  
29  
30  
31  
32  
33  
34  
35  
36  
37  
38  
39  
40  
41  
42  
43  
44  
45  
46  
47  
48  
49  
50  
51  
52  
53  
54  
55  
56  
57  
58  
59  
60

[44] Fone DL, Dunstan FD, Webster C, et al. Change in alcohol outlet density and alcohol-related harm to population health (CHALICE). *BMC Public Health* 2012;**12**:428

For peer review only

1  
2  
3 **LIST OF TITLES FOR FIGURES**  
4  
5  
6

7 Figure 1 Estimated probabilities of excess alcohol consumption by age group and gender  
8  
9 within neighbourhood deprivation quintiles  
10

11  
12  
13  
14 Figure 2 Estimated probabilities of binge drinking by age group and gender within  
15  
16 neighbourhood deprivation quintiles  
17  
18  
19  
20  
21  
22  
23  
24  
25  
26  
27  
28  
29  
30  
31  
32  
33  
34  
35  
36  
37  
38  
39  
40  
41  
42  
43  
44  
45  
46  
47  
48  
49  
50  
51  
52  
53  
54  
55  
56  
57  
58  
59  
60

1  
2  
3  
4  
5  
6  
7 **Socioeconomic patterning of excess alcohol consumption and**  
8  
9 **binge drinking: a cross-sectional study of multilevel associations**  
10  
11 **with neighbourhood deprivation**  
12  
13

14  
15  
16 David L Fone<sup>1</sup> MD

17 Daniel M Farewell<sup>1</sup> PhD

18 James White<sup>2</sup> PhD

19 Ronan A Lyons<sup>3</sup> MD

20 Frank D Dunstan<sup>1</sup> DPhil  
21  
22  
23  
24  
25  
26

27 1. Institute of Primary Care & Public Health, School of Medicine, Heath Park, Cardiff

28 University, Cardiff, CF14 4YS, UK

29 2. Centre for the Development and Evaluation of Complex Public Health Interventions,

30 School of Medicine, Cardiff University, Heath Park, Cardiff, CF14 4YS, UK

31 3. College of Medicine, Swansea University, Swansea SA2 8PP, UK  
32  
33  
34  
35  
36  
37

38 Corresponding author:

39 Professor David L Fone

40 Institute of Primary Care & Public Health, School of Medicine, 4th Floor Neuadd

41 Merionnydd, Heath Park, Cardiff University, Cardiff, CF14 4YS, UK

42 Telephone 02920 687241, Fax 02920 687236, e-mail foned@cf.ac.uk  
43  
44  
45  
46  
47  
48

49 **Keywords**

50 Alcohol, Social epidemiology, multilevel modelling, Public Health  
51  
52  
53  
54  
55  
56  
57  
58  
59  
60

## ABSTRACT

### Objectives

The influence of neighbourhood deprivation on the risk of harmful alcohol consumption, measured by the separate categories of excess consumption and binge drinking, has not been studied. The study objective ~~of the study~~ was to investigate the effect of neighbourhood deprivation with age, gender and socio-economic status (SES) on (1) excess alcohol consumption, and (2) binge drinking, in a representative population survey.

### Design

Cross-sectional study: multi-level analysis.

### Setting

Wales, UK, adult population ~ 2.2 million.

### Participants

58 282 respondents aged 18 years and over to four successive annual Welsh Health Surveys (2003/04-2007), nested within 32 692 households, 1839 census lower super output areas and the 22 unitary authority areas in Wales.

### Primary outcome measure

Maximal daily alcohol consumption during the past week was categorised using the UK Department of Health definition of 'none/never drinks', 'within guidelines', 'excess consumption but less than binge' and 'binge'. The data were analysed using continuation ratio ordinal multilevel models with multiple imputation for missing covariates.



## Results

Respondents in the most deprived neighbourhoods were more likely to binge drink than in the least deprived (adjusted estimates: 17.5% vs. 10.6%; difference = 6.9%, 95% CI: 6.0 to 7.8), but were less likely to report excess consumption (17.6% vs. 21.3%; difference = 3.7%, 95%

CI: 2.6 to 4.8). The effect of deprivation varied significantly with age and gender, but not with SES. Younger males in deprived neighbourhoods were most likely to binge drink. Males aged 35-64 showed the steepest increase in binge drinking in deprived neighbourhoods but males aged 18-24 showed a smaller increase with deprivation.

~~Younger males in deprived neighbourhoods were most likely to binge drink but the largest interaction effect of deprivation on binge drinking was found for middle aged males living in the most deprived areas.~~

## Conclusion

This large-scale population study is the first to show that neighbourhood deprivation acts differentially on the risk of binge drinking between males and females at different age groups. Understanding the socio-economic patterns of harmful alcohol consumption is important for public health policy development.

Formatted: Line spacing: Double

## ARTICLE SUMMARY

### Article Focus

- A recent systematic review found little evidence that living in neighbourhoods of high socio-economic deprivation is associated with a higher risk of harmful alcohol consumption
- The important distinction between excess alcohol consumption and binge drinking has not previously been investigated

### Key Messages

- A higher risk of binge drinking was found in residents living in deprived neighbourhoods, particularly in young and middle-aged men
- A higher risk of excess consumption, but less than binge, was found in residents of less deprived neighbourhoods
- Neighbourhood socio-economic deprivation is an important factor to consider in public health alcohol policy development

### Strengths and Limitations

- The main strength is the large representative dataset of over 58 000 respondents, or around one in fifty of the socially diverse Welsh adult population. The ordinal alcohol consumption outcome measure was based on a widely used definition published by the UK Department of Health

- 1
  - 2
  - 3
  - 4
  - 5
  - 6
  - 7
  - 8
  - 9
  - 10
  - 11
  - 12
  - 13
  - 14
  - 15
  - 16
  - 17
  - 18
  - 19
  - 20
  - 21
  - 22
  - 23
  - 24
  - 25
  - 26
  - 27
  - 28
  - 29
  - 30
  - 31
  - 32
  - 33
  - 34
  - 35
  - 36
  - 37
  - 38
  - 39
  - 40
  - 41
  - 42
  - 43
  - 44
  - 45
  - 46
  - 47
  - 48
  - 49
  - 50
  - 51
  - 52
  - 53
  - 54
  - 55
  - 56
  - 57
  - 58
  - 59
  - 60
- The cross-sectional analysis used the administratively defined census LSOA as a proxy for 'neighbourhood' and cannot investigate the possibility of causal relationships. Social desirability bias may result in under-reported alcohol consumption, although it is not known whether this varies between neighbourhoods.

## INTRODUCTION

Excess alcohol consumption causes a major global burden of disease, injury and social and economic cost.[1] Binge drinking, typically defined as consuming at least double the guideline limits in a single day during the previous week,[2] is an increasing problem which is rising particularly in young women.[3] It is associated with anti-social behaviour,[4] and around half of all violent crimes in the UK.[5] Binge drinking causes an extra burden on health services; between 20-40 % of people presenting to accident and emergency departments are intoxicated, increasing to 80% after midnight.[4] Recent data show that around 37% of men and 29% of women exceeded the current UK guidelines for safe levels of alcohol consumption of  $\leq 3$  units per day for women and  $\leq 4$  units per day for men in the past week; and 20% of men and 13% of women engaged in binge drinking, defined as  $> 6$  units per day for women and  $> 8$  units per day for men.[6] Given the wide range of harm resulting from this substantial level of consumption, the potential impact on health at the population level from a reduction in consumption is considerable.

Research investigating the socio-economic patterning of harmful alcohol consumption has generally found that lower socio-economic status (SES) groups drink more heavily and higher SES groups drink more frequently,[7] consistent with binge drinking being found to be more prevalent in the economically disadvantaged.[8] However, subtle variations in cut-points based on units have led to prevalence estimates for binge drinking in young men to differ by 22%,[2] and these summary SES relationships have been found to vary substantially with age, gender, educational level, employment status and the measure of consumption.[2,7-12]

In addition to socio-economic effects found at the individual level, it is theorised that small-area, or neighbourhood, socio-economic deprivation might exert an independent effect on

1  
2  
3  
4  
5  
6  
7 harmful alcohol consumption. However, a recent systematic review which included multilevel  
8 studies of neighbourhood deprivation and alcohol consumption found little evidence to  
9 support this hypothesis.[13] Of the four multilevel studies which were classified as rigorous in  
10 a quality assessment, one study set in the West of Scotland, UK, found no significant  
11 association between neighbourhood deprivation and drinking above guideline limits or the  
12 number of units consumed in the past week.[14] A second study set in California, USA, found  
13 that the odds of heavy alcohol consumption (>7 drinks/week for females and >14 for males)  
14 was significantly higher for people living in the least deprived neighbourhoods with no  
15 significant variation with individual SES.[15]  
16  
17  
18  
19  
20  
21  
22  
23  
24  
25

26 The two other studies described an association between high neighbourhood deprivation and  
27 high consumption.[16,17] Data from the nationally representative Third National Health and  
28 Nutrition Examination Survey (NHANES III, USA) found that a composite neighbourhood  
29 deprivation measure at the level of the census tract was associated with heavy alcohol use,  
30 defined as consuming five or more drinks almost every day (odds ratio 1.18; 95% CI: 1.01,  
31 1.38), but it was not reported whether this association varied with age, gender or SES.[16] A  
32 second US study found that higher mean income and income inequality at the larger  
33 community district level was significantly associated with a higher number of drinks per  
34 month among drinkers.[17] Four subsequent papers reporting small studies found no  
35 significant association between alcohol consumption and neighbourhood income,[18,19]  
36 neighbourhood unemployment,[20] or a composite measure of relative socio-economic  
37 disadvantage,[21] while a further large-scale study of over 90 000 subjects set in Canada  
38 found a small effect of neighbourhood deprivation on the number of drinks consumed per  
39 week in men, but not in women.[22]  
40  
41  
42  
43  
44  
45  
46  
47  
48  
49  
50  
51  
52  
53  
54  
55  
56  
57  
58  
59  
60

1  
2  
3  
4  
5  
6  
7 Possible explanations for these inconsistencies in neighbourhood associations found between  
8 studies may result from different methods of defining excess, or harmful, consumption, with  
9 some choosing definitions based on national guidelines for 'safe' consumption or units,[14]  
10 number of drinks,[15-19,21,22] or frequency of consumption.[19,20] Additional explanations  
11 for inconsistent neighbourhood associations may result from different measures of area  
12 deprivation, sizes of neighbourhood, and adjustment for different individual-level risk factors  
13 for excess alcohol consumption.[14-22]  
14  
15  
16  
17  
18  
19  
20

21  
22 Despite the substantial public health consequences of alcohol consumption and the possible  
23 importance of neighbourhood in explaining patterns of consumption, no previous study to our  
24 knowledge has investigated multilevel associations with neighbourhood deprivation which  
25 distinguish between excess consumption and binge drinking as distinct categories. Little is  
26 known on whether any associations vary within population groups. The aim of the present  
27 study was to investigate the effect of neighbourhood deprivation with age, gender and SES on  
28 (1) excess alcohol consumption above guideline limits, and (2) binge drinking, in a  
29 representative sample of the adult population of Wales, UK.  
30  
31  
32  
33  
34  
35  
36  
37  
38  
39  
40  
41  
42  
43  
44  
45  
46  
47  
48  
49  
50  
51  
52  
53  
54  
55  
56  
57  
58  
59  
60

## METHODS

### Participants

Data were drawn from four successive cross-sectional waves of the Welsh Health Survey 2003/04 to 2007, an interviewer-led household and individual survey of the adult population resident in Wales, UK.[23-25] The adult population of Wales is approximately 2.2 million (2001 Census) and the dataset available included a total of 60 555 adults aged 18 years and over. The sampling methods and the survey process are described in detail elsewhere.[24,25] Briefly, the sampling frame used was the Post Office's Postcode Address File. Private household addresses were randomly selected in a two stage design, sampling addresses within primary sampling units that were selected within the 22 unitary authority local government areas in Wales. Each adult member of the household was invited to complete a questionnaire. Response rates were high: in 2003/04 the adjusted household survey response was 74% with 85% of individuals responding within households,[24] with little change at 74% and 82% respectively in 2007.[25]

### Alcohol outcome measure

Participants were asked to state the highest number of units they had drunk on any one day in the previous seven days, using a standard prompt to convert different types and quantities of alcoholic drinks into units. The dataset provided the classification of units into ordinal categories of maximal daily consumption based on the UK Department of Health definitions (Table 1), with categories for 'none/never drinks', 'within guidelines', 'excess consumption but less than binge, and 'binge'. [26]

**Table 1** Categorisation of the alcohol consumption outcome variable

| Category                               | Maximum units drunk on any one day in the last week                                                         |
|----------------------------------------|-------------------------------------------------------------------------------------------------------------|
| None/never drinks                      | Did not drink in the last seven days                                                                        |
| Within guidelines                      | Men drinking no more than 4 units, women no more than 3 units                                               |
| Excess consumption but less than binge | Men drinking more than 4 and up to and including 8 units, women more than 3 and up to and including 6 units |
| Binge                                  | Men drinking more than 8 units, women more than 6 units                                                     |

Source: reference 26

### Neighbourhood deprivation measure

The Welsh Index of Multiple Deprivation 2005 (WIMD2005) was used as the measure of neighbourhood deprivation.[27] [WIMD2005-The Index](#) includes seven weighted domains of deprivation: income (25%), employment (25%), education (15%), health (15%), geographical access to services (10%), housing (5%), and physical environment (5%). [WIMD2005-These neighbourhood deprivation](#) scores are available for lower super output areas (LSOA), a unit of statistical geography defined by the 2001 UK Census.[28] There are 1896 LSOAs in Wales which have a mean population size of around 1500. Since the data included in each [neighbourhood deprivation-WIMD2005](#) domain are measured on different scales, each domain score is transformed to have a range of zero to 100 and the overall index is calculated using a weighted average, [27] taking a range of 1.4 to 78.9. [WIMD2005-This measure of neighbourhood deprivation](#) is highly correlated with the well-established Townsend index,[29] Spearman's  $r = 0.86$ ,  $n=1896$ ,  $p<0.001$ .

We used the LSOA as the closest available proxy for neighbourhood. Neighbourhood characteristics vary widely within Wales, from high to low levels of socioeconomic



1  
2  
3  
4  
5  
6  
7  
8  
9  
10  
11  
12  
13  
14  
15  
16  
17  
18  
19  
20  
21  
22  
23  
24  
25  
26  
27  
28  
29  
30  
31  
32  
33  
34  
35  
36  
37  
38  
39  
40  
41  
42  
43  
44  
45  
46  
47  
48  
49  
50  
51  
52  
53  
54  
55  
56  
57  
58  
59  
60

disadvantage, including deprived urban inner-city areas, less deprived city sub-urban residential areas, post-industrial valley towns, market towns and rural, farming areas.

Respondents were linked to their neighbourhood of residence by the data owners (the Welsh Government) and the dataset included individuals living in 1839 LSOAs, nested within the 22 unitary authorities (UA) in Wales. Each LSOA was assigned to one of five ordinal categories of neighbourhood deprivation WIMD2005 scores with equal counts of LSOAs in each quintile.

### Measures of individual SES and potential confounding variables

The principal measure of SES defined for the analysis was the National Statistics Socio-economic Classification (NS-SEC3) variable for the head of household. This is a measure of occupational social class with the following categories: professional/managerial, intermediate, routine and manual occupations, and never worked/long-term unemployed. Age was analysed in 10-year bands by gender. We considered other available measures of SES that were associated with alcohol consumption in the dataset as confounding variables: individual employment status (employed, seeking work, training/student, retired, permanently sick or disabled, at home), highest educational qualification (degree, intermediate, none), ethnicity (White, Black and minority ethnic) and housing tenure (owner occupier, social and private renting) (table 2).

Of the 60 555 respondents, 58 282 individuals living within 32 692 households completed the questions on alcohol consumption, and 50 641 had complete covariate information recorded in the dataset.

### Statistical Analysis

Since the outcome measure is an ordered categorical variable, the data were analysed using a continuation ratio model,[30] which allowed estimation of the association between neighbourhood deprivation and the likelihood of moving up one category of alcohol consumption,  $y$ , (e.g. from excess consumption but less than binge, to binge drinking). This continuation ratio approach used a linear predictor,  $\eta_k$ , to explain the probability of continuing to a higher category, conditional on reaching a certain ordinal level. The linear predictor was modelled by covariates  $x_k$  and fixed effects  $\beta$  :

$$\text{logit } p(y > k \mid y \geq k) = \eta_k = x_k \beta$$

This extends naturally to the multilevel framework, where we adopted the random effects model:

$$\text{logit } p(y > k \mid y \geq k, b) = x_k \beta + z_k b$$

where the linear predictor now has two components:  $x_k \beta$  are the fixed effects, and  $z_k b$  described the multilevel structure in the data. Again, in principle the influence of both fixed and random effects may vary according to the level  $k$ .

We estimated the regression coefficients  $\beta$  and the covariance matrix  $\text{Var}(b)$  and we derived  $p(y=k \mid b=0)$ , the predicted probabilities of membership of ordinal category  $k$  for the median geographical context  $b=0$  for each quintile of deprivation and category of SES.

[To model the variation in the four-category ordinal alcohol consumption outcome using a](#)

1  
2  
3  
4  
5  
6  
7 continuation ratio model, we first re-express this ordinal outcome in terms of defined three  
8 additional -binary explanatory variables-, one for each -yes/no- transitions between the alcohol  
9 outcome categories to indicate the level at which the transition was occurring non-drinking  
10 and drinking within guidelines,  
11 between drinking within guidelines and exceeding guidelines, and between exceeding  
12 guidelines and binge drinking. This necessitates the inclusion of an additional explanatory  
13 variable indicating which transition is being referred to. The advantage of this transformation  
14 is that standard software for logistic regression and its extensions to random effects  
15 models can be used to analyse the ordinal data.  
16  
17  
18  
19  
20  
21  
22  
23  
24  
25

26 The sequential modelling strategy started with the “null” four-level variance components  
27 model, with category-specific intercepts and random effects for households, LSOAs and UAs.

28  
29 The neighbourhood deprivation-WIMD2005 categorical variable was fitted to estimate the  
30 unadjusted neighbourhood deprivation fixed effects in model 1. To allow increased flexibility  
31 in a better understanding of the effects of deprivation on alcohol consumption, we fitted  
32 interactions between the neighbourhood deprivation quintiles and the each additional  
33 explanatory variable indicating the relevant binary transition. in question were included in the  
34 continuation ratio models to allow the use of completely flexible models for our ordinal  
35 data. To allow increased flexibility in understanding the effects of deprivation on alcohol  
36 consumption, interactions between the change in alcohol consumption category and  
37 deprivation quintile were included in the continuation ratio models. The predicted  
38  
39  
40  
41  
42  
43  
44  
45  
46  
47  
48  
49  
50  
51  
52  
53  
54  
55  
56  
57  
58  
59  
60  
probabilities of excess consumption and binge drinking we are derived from the sum of these  
additive main effects s and relevant interaction coefficients.

1  
2  
3  
4  
5  
6  
7 Social class, age group, gender, the interaction between age group and gender, and the  
8 potential confounders were then added to form model 2. The final model 3 was fitted with  
9 cross-level interactions in separate models for [neighbourhood deprivation-WIMD2005](#)  
10 interacting with age group and gender, and [neighbourhood deprivation-WIMD2005](#) with social  
11 class. Multiple imputation of five datasets using chained equations in R software was used to  
12 account for missing covariates.[31,32]  
13  
14  
15  
16  
17  
18  
19  
20

21  
22 The magnitude of the variation between LSOAs and between UAs was estimated using the  
23 standard deviation (SD) of their random effects, since these are measured on the same scale as  
24 the fixed effects for observed covariates. The quartiles of a standard normal variable lie at +/-  
25 0.67, and the differences between LSOA and between UA quartiles were computed by  
26 1.34\*SD to compare with the magnitude of the estimated fixed effects for social class.  
27  
28  
29  
30  
31  
32  
33  
34  
35  
36  
37  
38  
39  
40  
41  
42

## 43 RESULTS

### 44 Descriptive analysis

45  
46 Overall, 22 218 (38.1%) of the total 58 282 respondents reported their levels of alcohol  
47 consumption as 'none or never drinks', 16 059 (27.6%) reported 'within guidelines', 9664  
48 (16.6%) reported 'excess consumption but less than binge' and 10 341 (17.7%) reported  
49 'binge' drinking. Both excess consumption and particularly binge drinking were higher in  
50  
51  
52  
53  
54  
55  
56  
57  
58  
59  
60

1  
2  
3  
4  
5  
6  
7  
8  
9  
10  
11  
12  
13  
14  
15  
16  
17  
18  
19  
20  
21  
22  
23  
24  
25  
26  
27  
28  
29  
30  
31  
32  
33  
34  
35  
36  
37  
38  
39  
40  
41  
42  
43  
44  
45  
46  
47  
48  
49  
50  
51  
52  
53  
54  
55  
56  
57  
58  
59  
60

males than females. Excess consumption was highest in the 35-64 year age groups and binge drinking was highest in 18-34 year olds, declining with increasing age (table 2). The 'never worked and long-term unemployed' group and respondents with no educational qualifications showed substantially lower levels of both excess consumption and binge drinking than the three higher social class groups and those with some educational achievement. For employment status, the economically active who were employed or seeking work had higher levels of excess and binge consumption than economically inactive respondents. The proportion of respondents drinking to excess decreased with increasing neighbourhood deprivation but binge drinking showed the opposite pattern of increasing with higher deprivation (table 2).

**Table 2 Excess alcohol consumption and binge drinking by socio-economic status**

|                                     |                                         | Excess<br>consumption,<br>less than binge | %    | Binge | %    |       |
|-------------------------------------|-----------------------------------------|-------------------------------------------|------|-------|------|-------|
| Gender*                             | Female                                  | 4702                                      | 15.0 | 3482  | 11.1 | 31261 |
|                                     | Male                                    | 4962                                      | 18.4 | 6859  | 25.1 | 31261 |
| Age group**                         | 18-24                                   | 1001                                      | 14.5 | 2041  | 29.1 | 7029  |
|                                     | 25-34                                   | 1286                                      | 17.5 | 2105  | 28.7 | 7329  |
|                                     | 35-44                                   | 2007                                      | 19.6 | 2427  | 23.7 | 10225 |
|                                     | 45-54                                   | 2110                                      | 21.5 | 1931  | 19.7 | 9815  |
|                                     | 55-64                                   | 1961                                      | 19.2 | 1268  | 12.4 | 10216 |
|                                     | 65-74                                   | 951                                       | 12.4 | 444   | 5.8  | 7697  |
|                                     | 75-84                                   | 316                                       | 6.4  | 106   | 2.2  | 4923  |
| Social class:**                     | 85+                                     | 32                                        | 2.7  | 19    | 1.6  | 1189  |
|                                     | Professional and managerial occupations | 3850                                      | 19.5 | 3354  | 17.0 | 19699 |
|                                     | Intermediate occupations                | 1742                                      | 16.1 | 1873  | 17.3 | 10802 |
|                                     | Routine and manual occupations          | 3566                                      | 14.7 | 4397  | 18.2 | 24197 |
|                                     | Never worked and long-term unemployed   | 131                                       | 8.9  | 173   | 11.8 | 1465  |
| Employment status**                 | Employed                                | 5766                                      | 20.9 | 6961  | 25.2 | 27571 |
|                                     | Seeking work                            | 138                                       | 14.9 | 274   | 29.6 | 925   |
|                                     | Training/student                        | 483                                       | 14.8 | 739   | 22.6 | 3273  |
|                                     | Permanently sick or disabled            | 599                                       | 13.0 | 547   | 11.8 | 4619  |
|                                     | Retired                                 | 1539                                      | 11.8 | 755   | 5.8  | 13091 |
|                                     | At home                                 | 696                                       | 13.2 | 507   | 9.6  | 5284  |
| Highest educational qualification** | Other                                   | 276                                       | 14.9 | 349   | 18.8 | 1856  |
|                                     | No qualifications                       | 2140                                      | 12.6 | 2095  | 12.3 | 17026 |
|                                     | Intermediate qualifications             | 5405                                      | 18.3 | 6428  | 21.7 | 29601 |
| Tenure**                            | Degree/degree equivalent and above      | 1773                                      | 21.5 | 1445  | 17.5 | 8247  |
|                                     | Owner occupier                          | 8010                                      | 17.5 | 7883  | 17.2 | 45725 |
| Ethnicity*                          | Social renting                          | 956                                       | 11.8 | 1340  | 16.5 | 8123  |
|                                     | Private renting / Other                 | 663                                       | 15.6 | 1085  | 25.5 | 4262  |
| Neighbourhood deprivation quintile  | White                                   | 9492                                      | 16.8 | 10165 | 18.2 | 12222 |
|                                     | Black and minority ethnic               | 108                                       | 8.8  | 100   | 8.2  | 1222  |
| Neighbourhood deprivation quintile  | Least deprived                          | 2304                                      | 19.5 | 1967  | 16.7 | 11786 |
|                                     | Less deprived                           | 2111                                      | 17.2 | 1927  | 15.7 | 12267 |
|                                     | Mid deprived                            | 2063                                      | 16.0 | 2219  | 17.2 | 12875 |
|                                     | More deprived                           | 1726                                      | 15.0 | 2234  | 19.4 | 11544 |
|                                     | Most deprived                           | 1460                                      | 14.9 | 1994  | 20.3 | 9810  |

\*  $\chi^2$  test,  $p < 0.001$

\*\*  $\chi^2$  test for trend,  $p < 0.001$

## Multilevel models

The model 1 parameter estimates for the neighbourhood deprivation fixed effects and the interaction effects are shown in table 3, together with the unadjusted model predicted probabilities for the five neighbourhood deprivation quintiles. in model 1 are shown in table 3. The probabilities of excess consumption and binge drinking were computed from the sum of the fixed and interaction estimates for each neighbourhood deprivation quintile. As ~~with we found in~~ the descriptive analysis, the probability of excess consumption was higher in less deprived neighbourhoods with decreasing probability across the quintiles of deprivation. Binge drinking showed the opposite pattern of increasing probability with higher deprivation. The differences in magnitude between the model predicted probabilities and the descriptive data shown in table 2 are explained by the addition of the random effects in model 1.

Table 3 then shows the estimates for the neighbourhood deprivation fixed and interaction effects from model 2, whichAfter including social class, age group, ~~and~~ gender, the interaction between age group and gender, and the other confounding variables in model 2. The sum of the estimates for the fixed and interaction effects for the neighbourhood deprivation quintiles were used as in model 1 to compute the probabilities of excess consumption and binge drinking. In this~~the~~ adjusted model, the difference between the deprivation quintiles for the probability of binge drinking increased, with less effect on the excess consumption category ~~(table 3).~~ ~~†~~ Respondents in the most deprived neighbourhoods were more likely to binge drink than in the least deprived (adjusted estimates: 17.5% vs. 10.6%; difference in proportions = 6.9%, 95% CI: 6.0 to 7.8), but were less likely to report excess consumption (17.6% vs. 21.3%; difference in proportions = 3.7%, 95% CI: 2.6 to 4.8).

1  
2  
3  
4  
5  
6  
7  
8  
9 Table 3 also finally shows the predicted probabilities of consumption for the social classSES  
10 categories in the fully adjusted model 2. There was little variation in excess consumption with  
11 social classSES. The descriptive analysis finding of a higher probability of binge drinking in  
12 the three higher social class groups compared to the never worked/long-term unemployed  
13 category remained after adjustment.  
14  
15  
16  
17  
18  
19  
20  
21  
22  
23  
24  
25  
26  
27  
28  
29  
30  
31  
32  
33  
34  
35  
36  
37  
38  
39  
40  
41  
42  
43  
44  
45  
46  
47  
48  
49  
50  
51  
52  
53  
54  
55  
56  
57  
58  
59  
60



**Table 3 Model parameter estimates and predicted probabilities (%) for excess alcohol consumption and binge drinking for neighbourhood deprivation and SES**

|                                                                          | Parameter estimate (SE) | Excess consumption, less than binge % | Binge % |
|--------------------------------------------------------------------------|-------------------------|---------------------------------------|---------|
| <b>Model 1<sup>a</sup></b>                                               |                         |                                       |         |
| <b>WIMD2005:</b>                                                         |                         |                                       |         |
| Neighbourhood deprivation quintiles:                                     |                         |                                       |         |
| Least deprived                                                           | Reference               | 22.2                                  | 9.7     |
| Less deprived                                                            | -0.2042* (0.0372)       | 20.1                                  | 9.9     |
| Mid deprived                                                             | -0.4105* (0.0370)       | 19.1                                  | 11.2    |
| More deprived                                                            | -0.6544* (0.0375)       | 17.6                                  | 12.6    |
| Most deprived                                                            | -0.8526* (0.0391)       | 17.2                                  | 12.6    |
| Interaction: <del>WIMD2005*change in alcohol consumption category:</del> |                         |                                       |         |
| Within to excess: Less deprived                                          | 0.2033* (0.0446)        |                                       |         |
| Excess to binge: Less deprived                                           | 0.3254* (0.0565)        |                                       |         |
| Within to excess: Mid deprived                                           | 0.5656* (0.0443)        |                                       |         |
| Excess to binge: Mid deprived                                            | 0.7054* (0.0554)        |                                       |         |
| Within to excess: More deprived                                          | 0.9931* (0.0459)        |                                       |         |
| Excess to binge: More deprived                                           | 1.1510* (0.0563)        |                                       |         |
| Within to excess: Most deprived                                          | 1.3587* (0.0489)        |                                       |         |
| Excess to binge: Most deprived                                           | 1.3692* (0.0584)        |                                       |         |
| <b>Model 2<sup>b</sup></b>                                               |                         |                                       |         |
| <b>WIMD2005:</b>                                                         |                         |                                       |         |
| Neighbourhood deprivation quintiles:                                     |                         |                                       |         |
| Least deprived                                                           | Reference               | 21.3                                  | 10.6    |
| Less deprived                                                            | -0.1973* (0.0387)       | 19.5                                  | 11.1    |
| Mid deprived                                                             | -0.3879* (0.0386)       | 18.8                                  | 13.0    |
| More deprived                                                            | -0.6073* (0.0395)       | 17.5                                  | 15.3    |
| Most deprived                                                            | -0.7142* (0.0421)       | 17.6                                  | 17.5    |
| Interaction: <del>WIMD2005*change in alcohol consumption category:</del> |                         |                                       |         |
| Within to excess: Less deprived                                          | 0.1954* (0.0470)        |                                       |         |
| Excess to binge: Less deprived                                           | 0.3282* (0.0588)        |                                       |         |
| Within to excess: Mid deprived                                           | 0.5720* (0.0467)        |                                       |         |
| Excess to binge: Mid deprived                                            | 0.7296* (0.0577)        |                                       |         |
| Within to excess: More deprived                                          | 1.0157* (0.0483)        |                                       |         |
| Excess to binge: More deprived                                           | 1.2033* (0.0586)        |                                       |         |
| Within to excess: Most deprived                                          | 1.3996* (0.0514)        |                                       |         |
| Excess to binge: Most deprived                                           | 1.4615* (0.0608)        |                                       |         |
| <b>NS-SEC3: SES</b>                                                      |                         |                                       |         |
| Professional/managerial                                                  | Reference               | 19.8                                  | 14.6    |
| Intermediate                                                             | -0.0973* (0.0265)       | 19.0                                  | 13.0    |

19

|                                   |                   |      |      |
|-----------------------------------|-------------------|------|------|
| Routine occupations               | -0.1519* (0.0226) | 18.6 | 12.2 |
| Never worked/long-term unemployed | -0.3339* (0.0614) | 17.1 | 9.7  |

a Model 1 included fixed effects terms for WIMD2005-neighbourhood deprivation quintiles and the interaction with the binary transition explanatory variable for change in category of consumption, and random effects terms for household, LSOA and unitary authority

b Model 2 added social class, age group, gender, age group\*gender, and adjusted for employment status, highest educational qualification, ethnicity, and housing tenure

\* p<0.001

1  
2  
3  
4  
5  
6  
7  
8  
9  
10  
11  
12  
13  
14  
15  
16  
17  
18  
19  
20  
21  
22  
23  
24  
25  
26  
27  
28  
29  
30  
31  
32  
33  
34  
35  
36  
37  
38  
39  
40  
41  
42  
43  
44  
45  
46  
47  
48  
49  
50  
51  
52  
53  
54  
55  
56  
57  
58  
59  
60

The two-way cross-level interaction between neighbourhood deprivation WIMD2005, age group and gender showed the effect of neighbourhood deprivation on the probability of excess consumption and binge drinking varied significantly between age group and gender.

These model outputs are shown on the probability scale for ease of interpretation in figures 1 and 2. Little evidence of a cross-level interaction in females or older age groups was found for either excess consumption or binge drinking. Males had a higher probability of excess consumption in less deprived neighbourhoods quintiles than females. Although the probability of binge drinking in females increased with increasing deprivation quintile, the gradients were significantly steeper in males. The probability of binge drinking was highest at all levels of neighbourhood deprivation in males aged 18-25 to 34. The interaction effects suggested that males in the 35-64 year age groups showed the steepest increase in the probability of binge drinking associated with increasing neighbourhood deprivation, while the interaction effect in the 18-24 year age group suggested a weaker association of increasing binge drinking with increasing deprivation, and the interaction effect was largest in the 35-64 year age groups. The cross-level interaction between neighbourhood deprivation WIMD2005 and social class was not significant suggesting that the association of excess consumption and binge drinking with neighbourhood deprivation did not vary with SES.

Formatted: Font: (Default) Times New Roman

#### Random effects variance

The values for the intra-class correlation coefficients (%) given in table 4 show that the majority of the unexplained random variation occurred at the household level, suggesting that, as expected, drinking behaviour tends to cluster more within households than within neighbourhoods or within the larger-area UA (table 4). To examine the magnitude of the variation between neighbourhoods in comparison to the fixed-effect estimates for SES, For LSOAs, in model 2, the SD for LSOAs in model 2 = 0.156, giving the inter-quartile range of

the distribution of the LSOA variance = 0.21. This compares to a parameter estimate of -0.33 for the 'never worked' category of social class, of -0.15 for 'routine' occupations and -0.10 for the 'intermediate' category, compared to the professional/managerial category (table 3). The size of this variation is of similar magnitude to the social class estimates, which suggests there is important unexplained variation that can be attributed to LSOAs. Similarly, for UAs, the inter-quartile range = 0.16, suggesting that the magnitude of the UA random variation, although smaller than LSOA, remains of importance in explaining the spatial pattern of alcohol consumption.

**Table 4 Random effects variance in sequential multilevel models**

|                      | Level | Variance | SD    | Intra-class correlation (%) |
|----------------------|-------|----------|-------|-----------------------------|
| Null model           | HH    | 0.809    | 0.899 | 74.4                        |
|                      | LSOA  | 0.032    | 0.179 | 14.8                        |
|                      | UA    | 0.017    | 0.130 | 10.8                        |
| Model 1 <sup>a</sup> | HH    | 0.824    | 0.908 | 74.8                        |
|                      | LSOA  | 0.028    | 0.167 | 13.8                        |
|                      | UA    | 0.019    | 0.139 | 11.4                        |
| Model 2 <sup>b</sup> | HH    | 0.867    | 0.931 | 77.1                        |
|                      | LSOA  | 0.024    | 0.156 | 12.9                        |
|                      | UA    | 0.015    | 0.121 | 10.0                        |
| Model 3 <sup>c</sup> | HH    | 0.866    | 0.931 | 77.3                        |
|                      | LSOA  | 0.023    | 0.153 | 12.7                        |
|                      | UA    | 0.014    | 0.120 | 10.0                        |

a Model 1 included fixed effects terms for neighbourhood deprivation quintiles and the interaction with the binary transition explanatory variable for change in category of consumption, and random effects terms for household, LSOA and unitary authority. ~~Model 1 included fixed effects terms for WIMD2005 deprivation quintiles and the interaction with change in category of consumption, and random effects terms for household, LSOA and unitary authority.~~

1  
2  
3  
4  
5  
6  
7  
8  
9  
10  
11  
12  
13  
14  
15  
16  
17  
18  
19  
20  
21  
22  
23  
24  
25  
26  
27  
28  
29  
30  
31  
32  
33  
34  
35  
36  
37  
38  
39  
40  
41  
42  
43  
44  
45  
46  
47  
48  
49  
50  
51  
52  
53  
54  
55  
56  
57  
58  
59  
60

b Model 2 added social class, age group, gender, age group\*gender, and adjusted for employment status, highest educational qualification, ethnicity, and housing tenure

c Model 3 further included the two-way cross-level interaction between ~~WIMD2005~~ neighbourhood deprivation quintile, age group and gender

For peer review only

## DISCUSSION

### Main results

The current study has investigated the difference in associations between neighbourhood deprivation and excess alcohol consumption and binge drinking as ordinal categories, based on the UK definition.<sup>[26]</sup> ~~This is because~~ it has been suggested that it is more appropriate to set benchmarks for daily than for weekly consumption of alcohol following greater concern about the health and social risks associated with single episodes of intoxication.<sup>[6]</sup> Excess consumption was more common in less deprived neighbourhoods. In contrast, binge drinking was more common in deprived neighbourhoods. These findings add to the previous US and Canadian studies which showed a significant neighbourhood effect,<sup>[16,17,22]</sup> by further assessing the complex interacting effects of neighbourhood deprivation with consumption category, age and gender, and social class. The interaction effect of neighbourhood deprivation with age and gender ~~was greatest for~~ showed the steepest increase in binge drinking with deprivation was in middle-aged males with no significant interaction with social class. We also found a substantial variation between neighbourhoods, since the magnitude of the unexplained variance in alcohol consumption was similar to the effect sizes of individual SES.

### Possible mechanisms linking neighbourhood deprivation to harmful alcohol consumption

Three mechanisms have been proposed to explain how neighbourhood deprivation might exert an independent effect on the risk of harmful alcohol consumption, and a differential effect on middle-aged males.<sup>[16]</sup> First, the contagion hypothesis suggests that health behaviours are spread by social exchange and particularly social networks of personal friends.<sup>[33]</sup> Thus, binge drinking may be more acceptable in middle-aged men resident in deprived

1  
2  
3  
4  
5  
6  
7  
8  
9  
10  
11  
12  
13  
14  
15  
16  
17  
18  
19  
20  
21  
22  
23  
24  
25  
26  
27  
28  
29  
30  
31  
32  
33  
34  
35  
36  
37  
38  
39  
40  
41  
42  
43  
44  
45  
46  
47  
48  
49  
50  
51  
52  
53  
54  
55  
56  
57  
58  
59  
60

neighbourhoods than in the non-deprived. Second, the stress of living in areas of high neighbourhood disadvantage may make men more vulnerable to psychological distress.<sup>[34,35]</sup> This then increases the risk that alcohol is used as a coping mechanism.

Third, the structural hypothesis argues that neighbourhood social norms and institutions define the pattern of health behaviours.<sup>[36]</sup> Greater availability of cheap alcohol measured as higher alcohol outlet densities might influence harmful drinking rates, although the evidence summarised in systematic reviews of both cross-sectional and longitudinal studies is inconsistent.<sup>[37]</sup> There is some evidence that high deprivation neighbourhoods have a higher density of alcohol outlets,<sup>[15,348,359]</sup> and this might provide a mechanism to explain higher consumption in deprived neighbourhoods. However, two studies which found higher outlet densities in more deprived areas found that levels of consumption were highest in less deprived areas.<sup>[15,348]</sup> A third study found the spatial association between outlet density and deprivation did not vary systematically, suggesting the relationship between deprivation and outlet density may be different in different locations.<sup>[359]</sup> This deprivation-density hypothesis could not explain the findings of higher rates of excess consumption in the least deprived neighbourhoods in the current study. One possibility is the acceptance of social norms of regular drinking to excess, but not episodic binge drinking, in less deprived areas compared to a different set of social normative binge drinking behaviour in the most deprived areas.

### Strengths and limitations

Since 2003/04, the Welsh Health Survey has been an annual source of robust population survey data. It has the important strength of a large sampling fraction resulting in a representative response dataset that includes around one in fifty of the socially diverse Welsh

1  
2  
3  
4  
5  
6  
7 adult population, with detailed exposure data linked to the small-area neighbourhood. The  
8 study findings from such a comprehensive dataset should be widely generalisable. Several  
9 limitations should be considered. The alcohol consumption outcome measure was based on a  
10 widely used definition published by the UK Department of Health.[26] However, the  
11 possibility of social desirability bias resulting in under-reported alcohol consumption should  
12 be considered,[3640,3741] although it is not known whether under-reporting varies between  
13 neighbourhoods. The questionnaire responses were consistent year-on-year from four  
14 different successive samples, suggesting that responses were reliable. Non-response bias was  
15 a possibility but the surveys had a consistently good overall response to the interviewer-led  
16 method,[24,25]

17  
18  
19  
20  
21  
22  
23  
24  
25  
26  
27  
28 The administratively defined census LSOA was used as a proxy for 'neighbourhood'.  
29 However, the direction of bias from using non-homogeneous administrative areas is towards  
30 conservative estimates.[3842,439] Therefore it is unlikely that the current study over-  
31 estimated the associations between alcohol consumption and neighbourhood deprivation.  
32  
33 Finally, no inferences about causal processes can be made. Reverse cause, for example, could  
34 suggest that binge drinking causes a decline in social position, but this explanation seems  
35 unlikely for excess alcohol consumption in which the associations were in the opposite  
36 direction to binge drinking. A further limitation was that the dataset did not permit  
37 investigation of the possible mechanisms for our study findings.  
38  
39  
40  
41  
42  
43  
44  
45

46  
47 In conclusion, the socio-economic patterning of excess alcohol consumption and binge  
48 drinking was complex. The study findings have implications for enhancing public health  
49 alcohol policy development, emphasising the importance of neighbourhood deprivation, as  
50 measured primarily by levels of low income and unemployment, as a determinant of harmful  
51  
52  
53  
54



1  
2  
3  
4  
5  
6  
7  
8  
9  
10  
11  
12  
13  
14  
15  
16  
17  
18  
19  
20  
21  
22  
23  
24  
25  
26  
27  
28  
29  
30  
31  
32  
33  
34  
35  
36  
37  
38  
39  
40  
41  
42  
43  
44  
45  
46  
47  
48  
49  
50  
51  
52  
53  
54  
55  
56  
57  
58  
59  
60

levels of consumption. Further longitudinal research on the spatial relationships between alcohol consumption, outlet density, and socio-economic deprivation at individual and neighbourhood levels is necessary to further understand the underlying processes and provide further evidence for local and national policies to reduce alcohol-related harm.<sup>[404]</sup>

For peer review only

## COMPETING INTERESTS

None

## FUNDING

This work was supported by the Office of the Chief Social Research Officer (OCSRO), Welsh Government. [grant number 081218 SAP].

The work was undertaken at The Centre for the Development and Evaluation of Complex Interventions for Public Health Improvement, a UKCRC Public Health Research: Centre of Excellence. Funding from the British Heart Foundation, Cancer Research UK, Economic and Social Research Council (RES-590-28-0005), Medical Research Council, the Welsh Assembly Government and the Wellcome Trust (WT087640MA), under the auspices of the UK Clinical Research Collaboration, is gratefully acknowledged.

## Information Governance and data sharing

A formal data access agreement was signed with the Welsh Government in order to receive the dataset with the geographical variables for analysis. These data can only be accessed under such an agreement. There are no additional data available. Ethical approval was not required for this secondary analysis of an anonymised dataset.

## REFERENCES

- [1] Rehm J, Mathers C, Popova S, et al. Global burden of disease and injury and economic cost attributable to alcohol use and alcohol use disorders. *Lancet* 2009;**373**:2223-33.
- [2] McAlaney J, McMahon J. Establishing rates of binge drinking in the UK : Anomalies in the data. *Alcohol Alcohol* 2006;**41**:355-57.
- [3] Smith L, Foxcroft D. *Drinking in the UK. An exploration of trends*. York: Joseph Rowntree Foundation 2009. ISBN: 978-1-85935-698-2.
- [4] Hayward R, Sharp C. *Young people, crime and anti-social behaviour: findings from the 2003 Crime and Justice Survey. Home Office Research Findings 245*. London: Home Office 2005. ISSN 1473-8406.
- [5] Richardson A, Budd T. *Home Office Research Studies 263. Alcohol, crime and disorder: a study of young adults*. London: Home Office 2003. ISBN-1-84082-961-3.
- [6] Robinson S, Harris H. *Smoking and drinking among adults, 2009. A report on the 2009 General Lifestyle Survey*. London: Office for National Statistics 2011.
- [7] Huckle T, You RQ, Casswell S. Socio-economic status predicts drinking patterns but not alcohol-related consequences independently. *Addiction* 2010;**105**:1192-202.
- [8] Kuntsche E, Rehm J, Gmel G. Characteristics of binge drinkers in Europe. *Soc Sci Med* 2004;**59**:113-27.

1  
2  
3  
4  
5  
6  
7 [9] Jefferis BJ, Manor O, Power C. Social gradients in binge drinking and abstaining: trends  
8 in a cohort of British adults. *J Epidemiol Community Health* 2007;**61**:150-3.  
9

10  
11  
12 [10] Marmot M. Inequality, deprivation and alcohol use. *Addiction* 1997;**92**:S13-S20.  
13

14  
15  
16 [11] Van Oers J. Alcohol consumption, alcohol-related problems, problem drinking, and  
17 socioeconomic status. *Alcohol Alcoholism* 1999;**34**:78-88.  
18  
19

20  
21  
22 [12] Hart C, Ecob R, Smith GD. People, places and coronary heart disease risk factors: a  
23 multilevel analysis of the Scottish Heart Health Study archive. *Soc Sci Med* 1997;**45**:893-902.  
24  
25

26  
27  
28 [13] Karriker-Jaffe KJ. Areas of disadvantage: a systematic review of effects of area-level  
29 socioeconomic status on substance use outcomes. *Drug Alcohol Rev* 2011;**30**:84-95.  
30  
31

32  
33  
34 [14] Ecob R, Macintyre S. Small area variations in health related behaviours; do these depend  
35 on the behaviour itself, its measurement, or on personal characteristics? *Health Place*  
36 2000;**6**:261-74.  
37  
38

39  
40  
41 [15] Pollack CE, Cubbin C, Ahn D, et al. Neighbourhood deprivation and alcohol  
42 consumption: does the availability of alcohol play a role? *Int J Epidemiol* 2005;**34**:772-80.  
43  
44

45  
46  
47 [16] Stimpson JP, Ju H, Raji MA, et al. Neighborhood deprivation and health risk behaviors  
48 in NHANES III. *Am J Health Behav* 2007;**31**:215-22.  
49  
50

1  
2  
3  
4  
5  
6  
7  
8  
9  
10  
11  
12  
13  
14  
15  
16  
17  
18  
19  
20  
21  
22  
23  
24  
25  
26  
27  
28  
29  
30  
31  
32  
33  
34  
35  
36  
37  
38  
39  
40  
41  
42  
43  
44  
45  
46  
47  
48  
49  
50  
51  
52  
53  
54  
55  
56  
57  
58  
59  
60

[17] Galea S, Ahern J, Tracy M, et al. Neighborhood income and income distribution and the use of cigarettes, alcohol, and marijuana. *Am J Prev Med* 2007;**32**:S195-202.

[18] Cornaz S, Taffè P, Santos-Eggimann B. Life-course socioeconomic environment and health risk behaviours. A multilevel small-area analysis of young-old persons in an urban neighbourhood in Lausanne, Switzerland. *Health Place* 2009;**15**:273-83.

[19] Giskes K, Turrell G, Bentley R, et al. Individual and household-level socioeconomic position is associated with harmful alcohol consumption behaviours among adults. *Aust NZ J Publ Heal* 2011;**35**:270-7.

[20] Dzurova D, Spilkova J, Pikhart H. Social inequalities in alcohol consumption in the Czech Republic: a multilevel analysis. *Health Place* 2010;**16**:590-7.

[21] Adams RJ, Howard N, Tucker G, et al. Effects of area deprivation on health risks and outcomes: a multilevel cross-sectional, Australian population study. *Int J Public Health* 2009;**54**:183-92.

[22] Matheson FI, White HL, Moineddin R, et al. Drinking in context: the influence of gender and neighbourhood deprivation on alcohol consumption. *J Epidemiol Community Health* 2012;**66**:e4. Epub 2011 Feb 17.

1  
2  
3  
4  
5  
6 [23] Doyle-Francis M, Sadler K, Kingdon A, et al. *Welsh Health Survey User Guide*. National  
7  
8 Centre for Social Research, Welsh Assembly Government 2011.

9  
10 <http://wales.gov.uk/docs/statistics/2011/110127surveyguideen.pdf>

11  
12 <http://wales.gov.uk/docs/statistics/2011/110127surveyguideen.pdf> (accessed ~~15 January~~  
13 ~~28~~  
14 ~~February~~ 2013).

Field Code Changed

15  
16  
17  
18 [24] McGee A, Jotangia D, Prescott A, et al. *Welsh Health Survey - Year One Technical*  
19  
20 *Report*. National Centre for Social Research 2005.

21  
22 <http://wales.gov.uk/docs/statistics/2005/050701healthsurvey0304techen.pdf> (accessed ~~28~~  
23 ~~February~~ ~~15 January~~ 2013).

24  
25  
26  
27  
28 [25] Fuller E, Heeks F. *Welsh Health Survey 2007 Technical Report*. National Centre for  
29  
30 Social Research 2005.

31  
32 <http://wales.gov.uk/topics/statistics/publications/publication->  
33  
34 [archive/healthsurvey2007tech/?lang=en](http://wales.gov.uk/topics/statistics/publications/publication-archive/healthsurvey2007tech/?lang=en) (accessed ~~28 February~~ ~~15 January~~ 2013).

35  
36  
37 [26] Department of Health, Home Office, Department for Education and Skills and  
38  
39 Department for Culture, Media and Sport. *Safe. Sensible. Social. The next steps in the*  
40  
41 *National Alcohol Strategy*. London: DH Publications 2007:3.

42  
43 [http://www.dh.gov.uk/prod\\_consum\\_dh/groups/dh\\_digitalassets/@dh/@en/documents/digital](http://www.dh.gov.uk/prod_consum_dh/groups/dh_digitalassets/@dh/@en/documents/digital)  
44  
45 [asset/dh\\_075219.pdf](http://www.dh.gov.uk/prod_consum_dh/groups/dh_digitalassets/@dh/@en/documents/digitalasset/dh_075219.pdf) (accessed ~~28 February~~ ~~15 January~~ 2013).

46  
47  
48  
49 [27] Welsh Assembly Government. *Welsh Index of Multiple Deprivation 2005: Technical*  
50  
51 *report*

1  
2  
3  
4  
5  
6  
7  
8  
9  
10  
11  
12  
13  
14  
15  
16  
17  
18  
19  
20  
21  
22  
23  
24  
25  
26  
27  
28  
29  
30  
31  
32  
33  
34  
35  
36  
37  
38  
39  
40  
41  
42  
43  
44  
45  
46  
47  
48  
49  
50  
51  
52  
53  
54  
55  
56  
57  
58  
59  
60

<http://wales.gov.uk/cisd/publications/statspubs/wimd2005technical/en.pdf?lang=en> (accessed ~~28 February 15 January~~ 2013).

[28] Office for National Statistics (2011). *Super Output Areas (SOAs)*.

<http://www.ons.gov.uk/ons/guide-method/geography/beginner-s-guide/census/super-output-areas--soas-/index.html> (accessed ~~28 February 15 January~~ 2013).

Formatted: Font: 12 pt

[29] Townsend P, Phillimore P, Beattie A. *Health and deprivation: inequality and the North*. London: Routledge, 1988.

[30] Agresti A. *An introduction to categorical data analysis*. 2<sup>nd</sup> ed. Hoboken, New Jersey: John Wiley & Sons, Inc 2007.

[31] White IR, Royston P, Wood AM. Multiple imputation using chained equations: Issues and guidance for practice. *Stat Med* 2010;**30**:377-99.

[32] van Buuren S, Groothuis-Oudshoorn K. mice: Multivariate Imputation by Chained Equations in R. *Journal of Statistical Software* 2011;**45**:1-67.

[33] Boardman JD, Finch BK, Ellison CG, et al. Neighborhood disadvantage, stress, and drug use among adults. *J Health Soc Behav* 2001;**42**:151-65.

Formatted: Font: Italic

Formatted: Font: Bold

[34] Hill TD, Ross CE, Angel RJ. Neighborhood disorder, psychophysiological distress, and health. *J Health Soc Behav* 2005;**46**:170-86.

[35] Elliott M. The stress process in neighbourhood context. *Health Place* 2000;**6**:287-99.

Formatted: Font: Italic

Formatted: Font: Bold

1  
2  
3  
4  
5  
6  
7  
8  
9  
10  
11  
12  
13  
14  
15  
16  
17  
18  
19  
20  
21  
22  
23  
24  
25  
26  
27  
28  
29  
30  
31  
32  
33  
34  
35  
36  
37  
38  
39  
40  
41  
42  
43  
44  
45  
46  
47  
48  
49  
50  
51  
52  
53  
54  
55  
56  
57  
58  
59  
60

[36] Morland K, Wing S, Diez Roux A, et al. Neighborhood characteristics associated with the location of food stores and food service places. *Am J Prev Med* 2002;**22**:23-9.

Formatted: Font: Italic

Formatted: Font: Bold

[337] Popova S, Giesbrecht N, Bekmuradov D, et al. Hours and days of sale and density of alcohol outlets: Impacts on alcohol consumption and damage: A systematic review. *Alcohol* 2009;**44**:500-16.

Formatted: English (U.K.)

[384] Huckle T, Huakau J, Sweetsur P, et al. Density of alcohol outlets and teenage drinking: Living in an alcogenic environment is associated with higher consumption in a metropolitan setting. *Addiction* 2008;**103**:1614-21.

[395] Ellaway A, Macdonald L, Forsyth A, et al. The socio-spatial distribution of alcohol outlets in Glasgow city. *Health Place* 2010;**16**:167-72.

[4036] Embree BG, Whitehead PC. Validity and reliability of self-reported drinking behavior: dealing with the problem of response bias. *J Stud Alcohol* 1993;**54**:334-44.

[4137] Stockwell T, Donath S, Cooper-Stanbury M, et al. Under-reporting of alcohol consumption in household surveys: a comparison of quantity-frequency, graduated-frequency and recent recall. *Addiction* 2004;**99**:1024-33.

[4238] Blakely TA, Woodward AJ. Ecological effects in multi-level studies. *J Epidemiol Community Health* 2000;**54**:367-74.



1  
2  
3  
4  
5  
6  
7  
8  
9  
10  
11  
12  
13  
14  
15  
16  
17  
18  
19  
20  
21  
22  
23  
24  
25  
26  
27  
28  
29  
30  
31  
32  
33  
34  
35  
36  
37  
38  
39  
40  
41  
42  
43  
44  
45  
46  
47  
48  
49  
50  
51  
52  
53  
54  
55  
56  
57  
58  
59  
60

[4339] Stafford M, Duke-Williams O, Shelton N. Small area inequalities in health: Are we underestimating them? *Soc Sci Med* 2008;**67**:891-9.

[440] Fone DL, Dunstan FD, Webster C, et al. Change in alcohol outlet density and alcohol-related harm to population health (CHALICE). *BMC Public Health* 2012;**12**:428

1  
2  
3  
4  
5  
6  
7 **LIST OF TITLES FOR FIGURES**  
8  
9

10 Figure 1 Estimated probabilities of excess alcohol consumption by age group and gender  
11 within neighbourhood deprivation quintiles  
12 |  
13

14  
15  
16 Figure 2 Estimated probabilities of binge drinking by age group and gender within  
17 | neighbourhood deprivation quintiles  
18 |  
19

1  
2  
3  
4  
5  
6  
7  
8  
9  
10  
11  
12  
13  
14  
15  
16  
17  
18  
19  
20  
21  
22  
23  
24  
25  
26  
27  
28  
29  
30  
31  
32  
33  
34  
35  
36  
37  
38  
39  
40  
41  
42  
43  
44  
45  
46  
47  
48  
49  
50  
51  
52  
53  
54  
55  
56  
57  
58  
59  
60

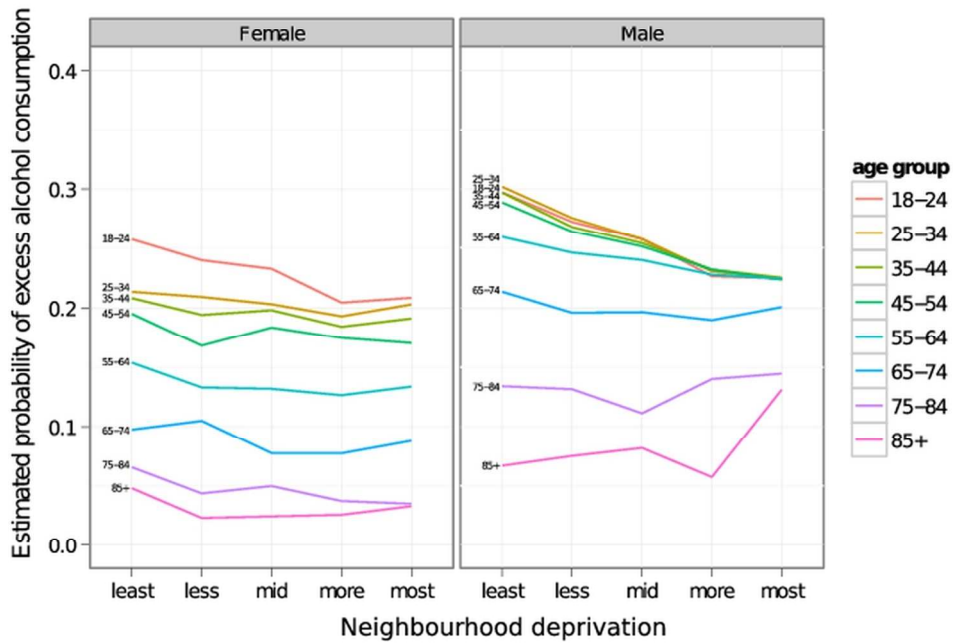

Estimated probabilities of excess alcohol consumption by age group and gender within neighbourhood deprivation quintiles  
125x90mm (300 x 300 DPI)

ew only

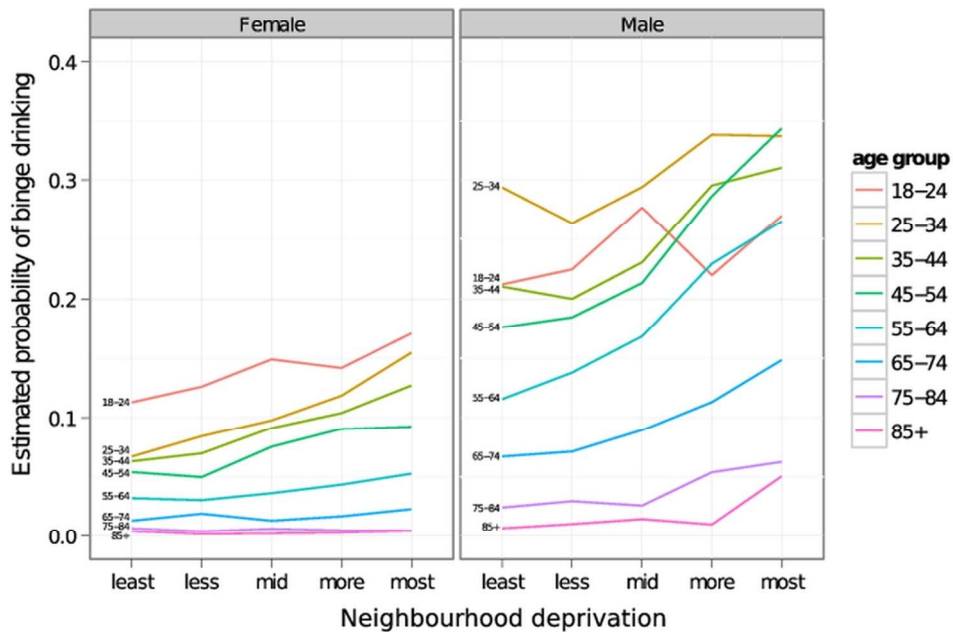

Estimated probabilities of binge drinking by age group and gender within neighbourhood deprivation quintiles  
125x90mm (300 x 300 DPI)

Review only

STROBE Statement—Checklist of items that should be included in reports of *cross-sectional studies*

|                              | DONE?            | Item No | Recommendation                                                                                                                                                                                    |
|------------------------------|------------------|---------|---------------------------------------------------------------------------------------------------------------------------------------------------------------------------------------------------|
| <b>Title and abstract</b>    | √                | 1       | (a) Indicate the study's design with a commonly used term in the title or the abstract                                                                                                            |
|                              | √                |         | (b) Provide in the abstract an informative and balanced summary of what was done and what was found                                                                                               |
| <b>Introduction</b>          |                  |         |                                                                                                                                                                                                   |
| Background/rationale         | √                | 2       | Explain the scientific background and rationale for the investigation being reported                                                                                                              |
| Objectives                   | √                | 3       | State specific objectives, including any prespecified hypotheses                                                                                                                                  |
| <b>Methods</b>               |                  |         |                                                                                                                                                                                                   |
| Study design                 | √                | 4       | Present key elements of study design early in the paper                                                                                                                                           |
| Setting                      | √                | 5       | Describe the setting, locations, and relevant dates, including periods of recruitment, exposure, follow-up, and data collection                                                                   |
| Participants                 | √                | 6       | (a) Give the eligibility criteria, and the sources and methods of selection of participants                                                                                                       |
| Variables                    | √                | 7       | Clearly define all outcomes, exposures, predictors, potential confounders, and effect modifiers. Give diagnostic criteria, if applicable                                                          |
| Data sources/<br>measurement | √                | 8*      | For each variable of interest, give sources of data and details of methods of assessment (measurement). Describe comparability of assessment methods if there is more than one group              |
| Bias                         | √                | 9       | Describe any efforts to address potential sources of bias                                                                                                                                         |
| Study size                   | √                | 10      | Explain how the study size was arrived at                                                                                                                                                         |
| Quantitative variables       | √                | 11      | Explain how quantitative variables were handled in the analyses. If applicable, describe which groupings were chosen and why                                                                      |
| Statistical methods          | √                | 12      | (a) Describe all statistical methods, including those used to control for confounding                                                                                                             |
|                              | √                |         | (b) Describe any methods used to examine subgroups and interactions                                                                                                                               |
|                              | √                |         | (c) Explain how missing data were addressed                                                                                                                                                       |
|                              | √                |         | (d) If applicable, describe analytical methods taking account of sampling strategy                                                                                                                |
|                              | √                |         | (e) Describe any sensitivity analyses                                                                                                                                                             |
| <b>Results</b>               |                  |         |                                                                                                                                                                                                   |
| Participants                 | √                | 13*     | (a) Report numbers of individuals at each stage of study—eg numbers potentially eligible, examined for eligibility, confirmed eligible, included in the study, completing follow-up, and analysed |
|                              | N/known          |         | (b) Give reasons for non-participation at each stage                                                                                                                                              |
|                              | Would add little |         | (c) Consider use of a flow diagram                                                                                                                                                                |
| Descriptive data             | √                | 14*     | (a) Give characteristics of study participants (eg demographic,                                                                                                                                   |

|                          |                                                  |     |                                                                                                                                                                                                              |
|--------------------------|--------------------------------------------------|-----|--------------------------------------------------------------------------------------------------------------------------------------------------------------------------------------------------------------|
|                          |                                                  |     | clinical, social) and information on exposures and potential confounders                                                                                                                                     |
|                          | √                                                |     | (b) Indicate number of participants with missing data for each variable of interest                                                                                                                          |
| Outcome data             | √                                                | 15* | Report numbers of outcome events or summary measures                                                                                                                                                         |
| Main results             | √                                                | 16  | (a) Give unadjusted estimates and, if applicable, confounder-adjusted estimates and their precision (eg, 95% confidence interval). Make clear which confounders were adjusted for and why they were included |
|                          | √ (equal count method for small-area boundaries) |     | (b) Report category boundaries when continuous variables were categorized                                                                                                                                    |
|                          | N/A                                              |     | (c) If relevant, consider translating estimates of relative risk into absolute risk for a meaningful time period                                                                                             |
| Other analyses           | √                                                | 17  | Report other analyses done—eg analyses of subgroups and interactions, and sensitivity analyses                                                                                                               |
| <b>Discussion</b>        |                                                  |     |                                                                                                                                                                                                              |
| Key results              | √                                                | 18  | Summarise key results with reference to study objectives                                                                                                                                                     |
| Limitations              | √                                                | 19  | Discuss limitations of the study, taking into account sources of potential bias or imprecision. Discuss both direction and magnitude of any potential bias                                                   |
| Interpretation           | √                                                | 20  | Give a cautious overall interpretation of results considering objectives, limitations, multiplicity of analyses, results from similar studies, and other relevant evidence                                   |
| Generalisability         | √                                                | 21  | Discuss the generalisability (external validity) of the study results                                                                                                                                        |
| <b>Other information</b> |                                                  |     |                                                                                                                                                                                                              |
| Funding                  | √                                                | 22  | Give the source of funding and the role of the funders for the present study and, if applicable, for the original study on which the present article is based                                                |

\*Give information separately for exposed and unexposed groups.

**Note:** An Explanation and Elaboration article discusses each checklist item and gives methodological background and published examples of transparent reporting. The STROBE checklist is best used in conjunction with this article (freely available on the Web sites of PLoS Medicine at <http://www.plosmedicine.org/>, Annals of Internal Medicine at <http://www.annals.org/>, and Epidemiology at <http://www.epidem.com/>). Information on the STROBE Initiative is available at [www.strobe-statement.org](http://www.strobe-statement.org).
